# Supplementary material
Source: publisher figshare collection journal article supplement (https://acs.figshare.com/ndownloader/files/5840544)

## Supporting Information

### Doyle-Kirmse Reaction of Allylic Sulfides with Diazoalkane-Free (2-Furyl)carbenoid Transfer

Yumiko Kato, Koji Miki, Fumiaki Nishino, Kouichi Ohe\*, and Sakae Uemura\*

*Department of Energy and Hydrocarbon Chemistry, Graduate School of Engineering,  
Kyoto University, Sakyo-ku, Kyoto 606-8501, Japan*

**General Procedures.** Analytical thin-layer chromatographies (TLC) were performed with silica gel 60 Merck F-254 plates. Column chromatographies were performed with Merck silica gel 60. NMR spectra were measured for solutions in CDCl<sub>3</sub> with Me<sub>4</sub>Si as an internal standard or CD<sub>2</sub>Cl<sub>2</sub> (<sup>1</sup>H and <sup>13</sup>C): the following abbreviations are used; s: singlet, d: doublet, t: triplet, q: quartet, m: multiplet. IR spectra were recorded with an FT-IR spectrometer. Melting points are uncorrected. High-resolution mass spectra (FAB HRMS) and low-resolution mass spectra (FAB LRMS) were obtained with JEOL JMX-SX 102A spectrometer. Elemental analyses were performed at Microanalytical Center of Kyoto University. All new compounds prepared were fully characterized. Tetrahydrofuran (THF) was distilled from sodium benzophenone ketyl under argon, and other solvents were dried by the usual methods and distilled before use.

#### Synthesis of Substrates.

The substrates were prepared by following procedures (Scheme 1). 2-Bromo-1-cyclohexenecarboxaldehyde (**13**)<sup>1,2</sup> and the substrate **1a**<sup>2b</sup> were prepared by reported method.

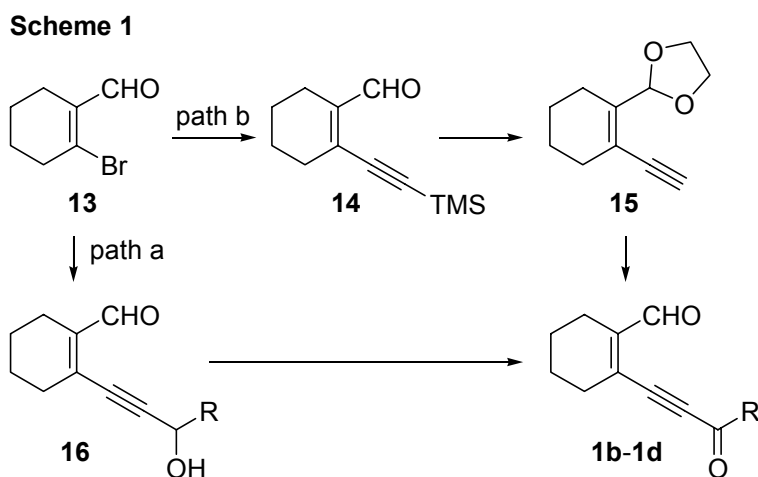

### Ene-yne-carbonyl compound **14**

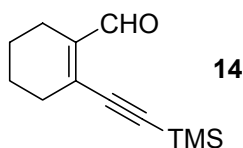

To a solution of trimethylsilylacetylene (2.4 mL, 18 mmol), **13** (2.8 g, 15 mmol), and triethylamine (10 mL, 75 mmol) in benzene (15 mL) were added CuI (0.21 g, 7.5 mol%) and Pd(PPh<sub>3</sub>)<sub>4</sub> (0.43 g, 2.5 mol%) at 0 °C under N<sub>2</sub>. After stirring at room temperature for 10 min, the resulting black solution was washed with saturated aqueous NH<sub>4</sub>Cl solution (30 mL) and the aqueous phase was extracted with AcOEt (10 mL x 3). The organic phase was dried over MgSO<sub>4</sub>. The organic solvents were removed under reduced pressure, and the residue was subjected to column chromatography on SiO<sub>2</sub> with hexane/AcOEt (v/v = 20/1) as an eluent to afford ene-yne-carbonyl compound **14** (3.0 g, 15 mmol, 98% yield) as a pale yellow oil; IR (neat) 675, 760, 844, 878, 894, 1146, 1226, 1250, 1363, 1599, 1677 (C=O), 2140 (C≡C), 2834, 2862, 2939 cm<sup>-1</sup>; <sup>1</sup>H NMR (300 MHz, CDCl<sub>3</sub>, 25 °C) δ 0.19 (s, 9H), 1.60–1.63 (m, 4H), 2.22–2.24 (m, 2H), 2.35–2.38 (m, 2H), 10.2 (s, 1H); <sup>13</sup>C NMR (75 MHz, CDCl<sub>3</sub>, 25 °C) δ 0.4, 21.7, 22.4, 22.6, 32.9, 102.1, 105.3, 140.4, 144.3, 193.7. HRMS (FAB): calcd for C<sub>12</sub>H<sub>19</sub>OSi (M+H<sup>+</sup>), 207.1205; found, 207.1207.

### Ene-yne compound **15**.

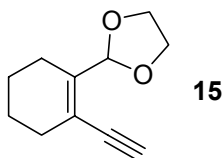

To a solution of **14** (3.0 g, 15 mmol) and ethyleneglycol (2.5 mL, 45 mmol) in benzene (10 mL) was added *p*-toluenesulfonic acid mono hydrate (43 mg, 5 mol%) at room temperature. After stirring for 2 h at reflux temperature using Dean-Stark apparatus, the solution was washed with saturated aqueous NaHCO<sub>3</sub> solution and the aqueous phase was extracted with Et<sub>2</sub>O (10 mL x 3). The combined organic phase was dried over MgSO<sub>4</sub>. The organic solvent was removed under reduced pressure. To a solution of the residue in DMSO (20 mL) was added KF (1.28 g, 22 mmol) at room temperature. After stirring for 1 h, the resulting brown solution was poured into water/Et<sub>2</sub>O mixture (50 mL, v/v = 1/1). The aqueous phase was extracted with

Et<sub>2</sub>O (10 mL x 3) and the combined organic phase was dried over MgSO<sub>4</sub>. The organic solvent was removed under reduced pressure, and the residue was subjected to column chromatography on SiO<sub>2</sub> with hexane/AcOEt (v/v = 15/1) to afford ene-yne compound **15** (1.8 g, 10 mmol, 67% yield for 2 steps) as a white solid (gradually decomposed at room temperature); mp. 32.0–32.3 °C; IR (KBr) 659, 949, 987, 1070, 1075, 1101, 1142, 1227, 1387, 2080 (C≡C), 2892, 2935, 3258 (≡C-H) cm<sup>-1</sup>; <sup>1</sup>H NMR (270 MHz, CDCl<sub>3</sub>, 25 °C) δ 1.58–1.65 (m, 4H), 2.08–2.18 (m, 2H), 2.18–2.26 (m, 2H), 3.12 (s, 1H), 3.90–4.05 (m, 4H), 5.88 (s, 1H); <sup>13</sup>C NMR (67.5 MHz, CDCl<sub>3</sub>, 25 °C) δ 21.6, 21.9, 22.1, 30.5, 65.6, 81.2, 82.0, 102.8, 121.0, 142.3. HRMS (FAB): calcd for C<sub>11</sub>H<sub>15</sub>O<sub>2</sub> (M+H<sup>+</sup>), 179.1072; found, 179.1074.

**Ene-yne-carbonyl compound 1b (path a).**

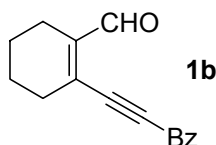

To a solution of 1-phenyl-2-propyn-1-ol (2.5 mL, 10 mmol), **13** (2.5 g, 13 mmol), and triethylamine (7.0 mL, 50 mmol) in benzene (10 mL) were added CuI (0.15 g, 7.5 mol%) and Pd(PPh<sub>3</sub>)<sub>4</sub> (0.29 g, 2.5 mol%) at 0 °C under N<sub>2</sub>. After stirring at room temperature for 1 h, the resulting black solution was washed with saturated aqueous NH<sub>4</sub>Cl solution (20 mL) and the aqueous phase was extracted with AcOEt (20 mL x 3). The organic phase was dried over MgSO<sub>4</sub>. The organic solvents were removed under reduced pressure, and the residue was subjected to short column chromatography on SiO<sub>2</sub> with hexane/AcOEt (v/v = 40/1) as an eluent to afford crude propargylic alcohol as a pale brown oil. This crude alcohol was oxidized by Swern method to give ene-yne-carbonyl compound **1b** (0.8 g, 3.4 mmol, 34% yield for 2 steps) as a colorless solid; mp. 82.8–84.6 °C; IR (KBr) 638, 707, 993, 1003, 1159, 1219, 1265, 1283, 1311, 1448, 1578, 1595, 1639 (C=O), 1675 (C=O), 2184 (C≡C), 2859, 2913, 2936, 2958 cm<sup>-1</sup>; <sup>1</sup>H NMR (400 MHz, CDCl<sub>3</sub>, 25 °C) δ 1.70–1.79 (m, 4H), 2.33–2.39 (m, 2H), 2.54–2.60 (m, 2H), 7.52 (dd, *J* = 7.2, 7.2 Hz, 2H), 7.65 (dd, *J* = 7.2, 7.2 Hz, 1H), 8.12 (d, *J* = 7.2 Hz, 2H), 10.29 (s, 1H); <sup>13</sup>C NMR (100 MHz, CDCl<sub>3</sub>, 25 °C) δ 20.7, 21.7, 22.4, 31.6, 88.2, 94.1, 128.7, 129.3, 134.4, 136.3, 136.4,

147.3, 177.1, 191.2. Anal. Calcd for C<sub>16</sub>H<sub>14</sub>O<sub>2</sub>: C, 80.65; H, 5.92. Found: C, 80.36; H, 5.92.

**Ene-yne-carbonyl compound 1c (path a).**

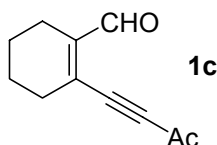

Ene-yne-carbonyl compound **1c** was obtained by the same procedure for the synthesis of **1b**; A yellow oil (34% yield for 2 steps); IR (neat) 608, 706, 1214, 1246, 1364, 1428, 1680 (C=O), 2183 (C≡C), 2860, 2934 cm<sup>-1</sup>; <sup>1</sup>H NMR (270 MHz, CDCl<sub>3</sub>, 25 °C) δ 1.65–1.71 (m, 4H), 2.28–2.35 (m, 2H), 2.42 (s, 3H), 2.45–2.50 (m, 2H), 10.2 (s, 1H); <sup>13</sup>C NMR (67.5 MHz, CDCl<sub>3</sub>, 25 °C) δ 20.7, 21.9, 22.4, 31.5, 32.8, 85.6, 95.2, 136.0, 147.2, 183.5, 191.3. HRMS (FAB): calcd for C<sub>11</sub>H<sub>13</sub>O<sub>2</sub> (M+H<sup>+</sup>), 177.0916; found, 177.0916.

**Ene-yne-carbonyl compound 1d (path b).**

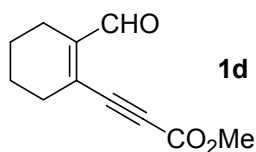

To a solution of *i*-Pr<sub>2</sub>NH (0.64 mL, 4.5 mmol) in THF (50 mL) was slowly added *n*-BuLi (2.8 mL, 4.5 mmol, 1.6 M in hexane) at -78 °C under N<sub>2</sub>. After stirring at -78 °C for 10 min, to this pale yellow solution was added dropwise **15** (0.53 g, 3.0 mmol) in THF (5 mL) at -78 °C. After stirring for 30 min at -78 °C, to this pale yellow solution was added dropwise chloroformate (0.70 mL, 9.0 mmol) at -78 °C, and then the resulting solution was gradually warmed up to room temperature. After an additional stirring for 30 min, the solution was washed with saturated aqueous NH<sub>4</sub>Cl solution (50 mL), and the aqueous phase was extracted with AcOEt (20 mL x 3). The combined organic phase was dried over MgSO<sub>4</sub>. The organic solvent was removed under reduced pressure, and the residue was subjected to column chromatography on SiO<sub>2</sub> with hexane/AcOEt (v/v = 10/1) as an eluent to afford ene-yne-carbonyl compound **1d** (0.41 g, 2.1 mmol, 71% yield) as a colorless oil; IR (neat) 733, 747, 1147, 1221, 1261, 1281, 1433, 1681 (C=O), 1716 (C=O), 2210

(C≡C), 2863, 2943  $\text{cm}^{-1}$ ;  $^1\text{H}$  NMR (270 MHz,  $\text{CDCl}_3$ , 25  $^\circ\text{C}$ )  $\delta$  1.63–1.75 (m, 4H), 2.29–2.33 (m, 2H), 2.42–2.48 (m, 2H), 3.83 (s, 3H), 10.1 (s, 1H);  $^{13}\text{C}$  NMR (67.5 MHz,  $\text{CDCl}_3$ , 25  $^\circ\text{C}$ )  $\delta$  20.7, 21.7, 22.4, 31.3, 53.0, 82.2, 87.9, 135.5, 147.7, 153.6, 191.3. HRMS (FAB): calcd for  $\text{C}_{11}\text{H}_{13}\text{O}_3$  ( $\text{M}+\text{H}^+$ ), 193.0865; found, 193.0865.

### Typical Procedure for Catalytic Carbene Transfer Reaction with **1**.

To a solution of **1** (0.25 mmol) and sulfide (10 equiv) placed in the flame dried Schlenk flask and dissolved in dry and deoxygenated  $\text{CH}_2\text{Cl}_2$  or  $\text{ClCH}_2\text{CH}_2\text{Cl}$  (1.0 mL) was added  $[\text{Rh}(\text{OAc})_2]_2$  (2.7 mg, 0.006 mmol) at room temperature. After the reaction was complete, the organic solvent was removed under reduced pressure, and the residue was subjected to column chromatography on  $\text{SiO}_2$  with hexane/ $\text{AcOEt}$  ( $v/v = 20/1$ ) as an eluent to afford the corresponding product **4**, **7**, **9**, **10**, and **12**.

#### Sulfide **4b**.

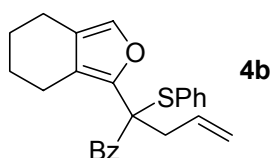

A colorless oil (98% yield); IR (neat) 693, 749, 919, 1123, 1182, 1213, 1229, 1255, 1439, 1446, 1473, 1579, 1595, 1679 ( $\text{C}=\text{O}$ ), 2855, 2931, 3073  $\text{cm}^{-1}$ ;  $^1\text{H}$  NMR (400 MHz,  $\text{CDCl}_3$ , 25  $^\circ\text{C}$ )  $\delta$  1.49–1.60 (m, 4H), 1.80–1.89 (m, 1H), 2.34–2.43 (m, 1H), 2.45–2.53 (m, 2H), 2.90 (d,  $J = 6.8$  Hz, 2H), 4.78 (d,  $J = 17.2$  Hz, 1H), 5.03 (d,  $J = 10.0$  Hz, 1H), 5.94 (tdd,  $J = 6.8, 10.0, 17.2$  Hz, 1H), 7.09 (s, 1H), 7.13 (d,  $J = 7.2$  Hz, 2H), 7.22 (dd,  $J = 7.2, 7.2$  Hz, 2H), 7.28–7.36 (m, 3H), 7.45 (dd,  $J = 7.2, 7.2$  Hz, 1H), 7.58 (d,  $J = 7.2$  Hz, 2H);  $^{13}\text{C}$  NMR (100 MHz,  $\text{CDCl}_3$ , 25  $^\circ\text{C}$ )  $\delta$  20.4, 21.1, 22.9, 23.0, 38.6, 67.0, 118.7, 120.4, 123.3, 128.1, 128.3, 129.1, 129.1, 130.7, 132.2, 132.3, 135.5, 136.1, 137.5, 143.7, 194.7. HRMS (FAB): calcd for  $\text{C}_{25}\text{H}_{25}\text{O}_2\text{S}$  ( $\text{M}+\text{H}^+$ ), 389.1575; found, 389.1570.

#### Sulfide **4c**.

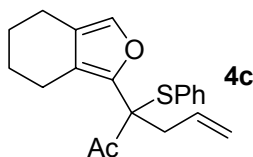

A colorless oil (94% yield); IR (neat) 693, 748, 917, 1180, 1350, 1440, 1715 (C=O), 2935  $\text{cm}^{-1}$ ;  $^1\text{H}$  NMR (300 MHz,  $\text{CDCl}_3$ , 25  $^\circ\text{C}$ )  $\delta$  1.58–1.65 (m, 4H), 1.99–2.08 (m, 1H), 2.17 (s, 3H), 2.40–2.48 (m, 1H), 2.48–2.56 (m, 2H), 2.74 (d,  $J$  = 6.9 Hz, 2H), 5.09 (d,  $J$  = 17.1 Hz, 1H), 5.13 (d,  $J$  = 9.6 Hz, 1H), 5.93 (tdd,  $J$  = 6.9, 9.6, 17.1 Hz, 1H), 7.08 (s, 1H), 7.15 (d,  $J$  = 7.8 Hz, 2H), 7.23 (dd,  $J$  = 7.8, 7.8 Hz, 2H), 7.33 (dd,  $J$  = 7.8, 7.8 Hz, 1H);  $^{13}\text{C}$  NMR (75 MHz,  $\text{CDCl}_3$ , 25  $^\circ\text{C}$ )  $\delta$  20.3, 21.4, 22.7, 23.1, 26.4, 37.0, 68.1, 118.5, 120.8, 123.0, 128.5, 129.2, 130.5, 132.8, 136.5, 137.1, 143.5, 202.3. HRMS (FAB): calcd for  $\text{C}_{20}\text{H}_{22}\text{O}_2\text{S}$  ( $\text{M}+\text{H}^+$ ), 327.1419; found, 327.1418.

#### Sulfide 4d.

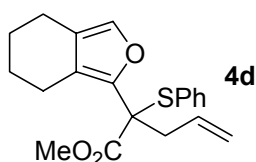

A colorless oil (83% yield); IR (neat) 692, 730, 953, 990, 1053, 1216, 1315, 1437, 1612, 1705 (C=O), 2941, 3431  $\text{cm}^{-1}$ ;  $^1\text{H}$  NMR (300 MHz,  $\text{CD}_2\text{Cl}_2$ , 25  $^\circ\text{C}$ )  $\delta$  1.40–1.63 (m, 4H), 1.78 (td,  $J$  = 6.6, 16.2 Hz, 1H), 2.20 (td,  $J$  = 6.6, 16.2 Hz, 1H), 2.45–2.47 (m, 2H), 2.83–2.92 (m, 2H), 3.72, (s, 3H), 5.15 (d,  $J$  = 16.8 Hz, 1H), 5.16 (d,  $J$  = 10.2 Hz, 1H), 5.98 (tdd,  $J$  = 6.6, 10.2, 16.8 Hz, 1H), 7.04 (s, 1H), 7.12 (d,  $J$  = 7.2 Hz, 2H), 7.22 (dd,  $J$  = 7.2, 7.2 Hz, 2H), 7.34 (dd,  $J$  = 7.2, 7.2 Hz, 1H);  $^{13}\text{C}$  NMR (75 MHz,  $\text{CD}_2\text{Cl}_2$ , 25  $^\circ\text{C}$ )  $\delta$  20.6, 21.3, 23.0, 23.4, 39.7, 53.1, 63.0, 119.1, 120.8, 123.2, 128.7, 129.6, 131.1, 133.3, 136.1, 137.9, 144.5, 170.6. HRMS (FAB): calcd for  $\text{C}_{20}\text{H}_{22}\text{O}_3\text{S}$  ( $\text{M}^+$ ), 342.1290; found, 342.1288.

#### Sulfide 5d.

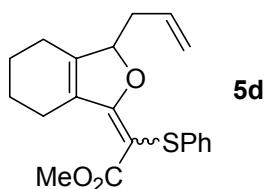

A colorless oil (85% yield); IR (neat) 690, 739, 1024, 1024, 1255, 1438, 1478, 1741 (C=O), 2934  $\text{cm}^{-1}$ ;  $^1\text{H}$  NMR (270 MHz,  $\text{CD}_2\text{Cl}_2$ , 25  $^\circ\text{C}$ )  $\delta$  1.52–1.68 (m, 4H), 2.30–2.47 (m, 4H), 2.49–2.73 (m, 2H), 3.57, (s, 3H), 3.67 (t,  $J$  = 6.8 Hz, 1H), 4.90 (d,  $J$  = 10.0 Hz, 1H), 4.96 (d,  $J$  = 17.0 Hz, 1H), 5.62 (tdd,  $J$  = 6.8, 10.0, 17.0 Hz, 1H), 6.95 (d,

$J = 7.3$  Hz, 2H), 7.04 (dd,  $J = 7.3$ , 7.3 Hz, 1H), 7.14 (dd,  $J = 7.3$ , 7.3 Hz, 2H);  $^{13}\text{C}$  NMR (67.5 MHz,  $\text{CD}_2\text{Cl}_2$ , 25 °C)  $\delta$  20.7, 21.6, 23.1, 23.3, 34.4, 44.4, 52.4, 117.1, 121.0, 125.9, 126.6, 126.7, 129.1, 132.2, 135.1, 137.5, 148.8, 171.3. HRMS (FAB): calcd for  $\text{C}_{20}\text{H}_{22}\text{O}_3\text{S}$  ( $\text{M}^+$ ), 342.1290; found, 342.1292.

#### Sulfide 7a.

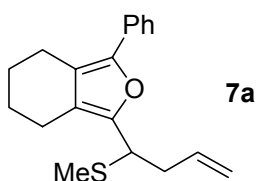

A yellow oil [purified by column chromatography on  $\text{SiO}_2$  with hexane/AcOEt (v/v = 300/1), 60% yield]; IR (neat) 691, 763, 912, 1067, 1440, 1495, 1596, 2935, 3403  $\text{cm}^{-1}$ ;  $^1\text{H}$  NMR (300 MHz,  $\text{CD}_2\text{Cl}_2$ , 25 °C)  $\delta$  1.66–1.73 (m, 4H), 1.99 (s, 3H), 2.48–2.50 (m, 2H), 2.60–2.85 (m, 4H), 3.87 (dd,  $J = 6.8$ , 8.6 Hz, 1H), 4.98 (d,  $J = 10.3$  Hz, 1H), 5.07 (d,  $J = 17.0$  Hz, 1H), 5.78 (tdd,  $J = 6.8$ , 10.3, 17.0 Hz, 1H), 7.16 (dd,  $J = 7.6$ , 7.6 Hz, 1H), 7.34 (dd,  $J = 7.6$ , 7.6 Hz, 2H), 7.56 (d,  $J = 7.6$  Hz, 2H);  $^{13}\text{C}$  NMR (75 MHz,  $\text{CD}_2\text{Cl}_2$ , 25 °C)  $\delta$  14.2, 21.1, 23.2, 23.3, 23.8, 37.7, 42.5, 116.8, 119.5, 121.0, 124.4, 126.4, 128.9, 132.4, 136.0, 145.7, 146.8. HRMS (FAB): calcd for  $\text{C}_{19}\text{H}_{22}\text{OS}$  ( $\text{M}^+$ ), 298.1391; found, 298.1389.

#### Sulfide 7b.

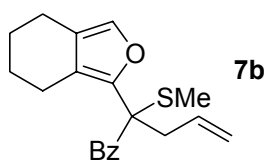

A colorless oil (77% yield); IR (neat) 695, 915, 1231, 1446, 1595, 1681 ( $\text{C}=\text{O}$ ), 1769, 2937, 3071, 3470  $\text{cm}^{-1}$ ;  $^1\text{H}$  NMR (400 MHz,  $\text{CDCl}_3$ , 25 °C)  $\delta$  1.45–1.56 (m, 4H), 1.86 (s, 3H), 2.30–2.35 (m, 2H), 2.35–2.48 (m, 2H), 2.98 (d,  $J = 6.6$  Hz, 2H), 4.96 (d,  $J = 17.3$  Hz, 1H), 5.02 (d,  $J = 10.0$  Hz, 1H), 5.76 (tdd,  $J = 6.6$ , 10.0, 17.3 Hz, 1H), 7.12 (s, 1H), 7.26 (dd,  $J = 7.2$ , 7.2 Hz, 2H), 7.42 (dd,  $J = 7.2$ , 7.2 Hz, 1H), 7.64 (d,  $J = 7.2$  Hz, 2H);  $^{13}\text{C}$  NMR (67.5 MHz,  $\text{CD}_2\text{Cl}_2$ , 25 °C)  $\delta$  11.4, 20.6, 21.7, 23.3, 23.5, 37.9, 61.1, 118.0, 119.7, 123.7, 128.1, 129.3, 132.3, 133.0, 135.8, 136.3, 144.3, 194.1. HRMS (FAB): calcd for  $\text{C}_{20}\text{H}_{23}\text{O}_2\text{S}$  ( $\text{M}+\text{H}^+$ ), 327.1419; found, 327.1418.

**Sulfide 7c.**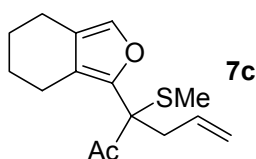

A colorless oil (72% yield); IR (neat) 914, 1129, 1352, 1437, 1597, 1702 (C=O), 1769, 2937, 3380  $\text{cm}^{-1}$ ;  $^1\text{H}$  NMR (270 MHz,  $\text{CD}_2\text{Cl}_2$ , 25  $^\circ\text{C}$ )  $\delta$  1.63–1.69 (m, 4H), 1.80 (s, 3H), 2.06 (s, 3H), 2.45–2.52 (m, 4H), 2.78 (d,  $J$  = 7.0 Hz, 2H), 5.04 (d,  $J$  = 17.0 Hz, 1H), 5.06 (d,  $J$  = 10.0 Hz, 1H), 5.68 (tdd,  $J$  = 7.0, 10.0, 17.0 Hz, 1H), 7.10 (s, 1H);  $^{13}\text{C}$  NMR (67.5 MHz,  $\text{CD}_2\text{Cl}_2$ , 25  $^\circ\text{C}$ )  $\delta$  11.4, 20.7, 22.1, 23.3, 23.7, 25.7, 36.2, 62.6, 117.7, 120.1, 123.3, 133.5, 136.6, 143.9, 201.1. HRMS (FAB): calcd for  $\text{C}_{15}\text{H}_{21}\text{O}_2\text{S}$  ( $\text{M}+\text{H}^+$ ), 265.1262; found, 265.1263.

**Sulfide 7d.**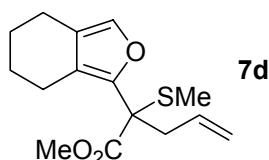

A colorless oil (91% yield); IR (neat) 609, 755, 917, 1128, 1211, 1435, 1737 (C=O), 2930, 3450  $\text{cm}^{-1}$ ;  $^1\text{H}$  NMR (400 MHz,  $\text{CD}_2\text{Cl}_2$ , 25  $^\circ\text{C}$ )  $\delta$  1.49–1.58 (m, 4H), 1.81 (s, 3H), 2.27–2.31 (m, 1H), 2.40–2.43 (m, 3H), 2.86 (d,  $J$  = 7.2 Hz, 2H), 3.65 (s, 3H), 4.97 (d,  $J$  = 10.0 Hz, 1H), 5.01 (d,  $J$  = 16.8 Hz, 1H), 5.69 (tdd,  $J$  = 7.2, 10.0, 16.8 Hz, 1H), 7.00 (s, 1H);  $^{13}\text{C}$  NMR (100 MHz,  $\text{CD}_2\text{Cl}_2$ , 25  $^\circ\text{C}$ )  $\delta$  12.9, 20.6, 21.7, 23.2, 23.6, 39.9, 52.9, 57.4, 118.5, 119.4, 123.1, 133.2, 136.1, 144.6, 170.8. HRMS (FAB): calcd for  $\text{C}_{15}\text{H}_{20}\text{O}_3\text{S}$  ( $\text{M}^+$ ), 280.1133; found, 280.1136.

**Sulfide 9a.**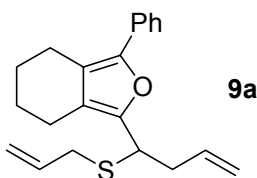

A yellow oil [purified by column chromatography on  $\text{SiO}_2$  with hexane/AcOEt (v/v = 300/1), 43% yield]; IR (neat) 692, 762, 916, 989, 1070, 1438, 1492, 1600, 2360, 2925, 3077  $\text{cm}^{-1}$ ;  $^1\text{H}$  NMR (400 MHz,  $d_8$ -THF, 25  $^\circ\text{C}$ )  $\delta$  1.66–1.75 (m, 4H), 2.47 (dd,  $J$  =



6.0, 6.0 Hz, 2H), 2.54–2.59 (m, 1H), 2.72–2.76 (m, 3H), 3.06 (dd,  $J = 6.0, 6.0$  Hz, 2H), 3.93 (dd,  $J = 6.8, 9.2$  Hz, 1H), 4.96–5.10 (m, 4H), 5.72–5.81 (m, 2H), 7.10 (dd,  $J = 7.6, 7.6$  Hz, 1H), 7.28 (dd,  $J = 7.6, 7.6$  Hz, 2H), 7.53 (d,  $J = 7.6$  Hz, 2H);  $^{13}\text{C}$  NMR (100 MHz,  $d_8$ -THF, 25 °C)  $\delta$  20.9, 20.9, 22.9, 23.5, 33.9, 37.9, 40.4, 115.8, 116.0, 118.8, 120.2, 123.8, 125.7, 128.2, 132.1, 135.0, 135.4, 145.4, 146.6. HRMS (FAB): calcd for  $\text{C}_{21}\text{H}_{25}\text{OS}$  ( $\text{M}+\text{H}^+$ ), 325.1626; found, 325.1629.

#### Sulfide 9b.

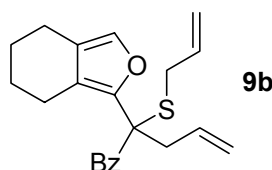

A colorless oil [purified by column chromatography on  $\text{SiO}_2$  with hexane/AcOEt ( $v/v = 30/1$  to  $20/1$ ), 32% yield]; IR (neat) 696, 919, 1020, 1230, 1260, 1446, 1673 ( $\text{C}=\text{O}$ ), 1769, 2934, 3075, 3435  $\text{cm}^{-1}$ ;  $^1\text{H}$  NMR (300 MHz,  $\text{CD}_2\text{Cl}_2$ , 25 °C)  $\delta$  1.31–1.67 (m, 4H), 2.29–2.48 (m, 4H), 2.97 (d,  $J = 6.9$  Hz, 2H), 3.04 (d,  $J = 6.9$  Hz, 2H), 4.88–5.13 (m, 4H), 5.62–5.83 (m, 2H), 7.14 (s, 1H), 7.29 (dd,  $J = 7.5, 7.5$  Hz, 2H), 7.45 (dd,  $J = 7.5, 7.5$  Hz, 1H), 7.60 (d,  $J = 7.5$  Hz, 2H);  $^{13}\text{C}$  NMR (75 MHz,  $\text{CD}_2\text{Cl}_2$ , 25 °C)  $\delta$  20.5, 21.7, 23.2, 23.4, 31.9, 39.2, 62.5, 117.8, 118.4, 120.1, 123.9, 128.3, 129.4, 132.5, 133.1, 133.9, 135.9, 136.4, 144.4, 194.8. HRMS (FAB): calcd for  $\text{C}_{22}\text{H}_{24}\text{O}_2\text{S}$  ( $\text{M}^+$ ), 352.1497; found, 352.1495.

#### Sulfide 10b.

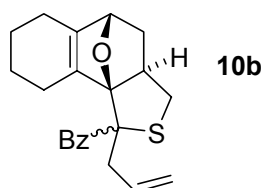

After the reaction of **1b** at 80 °C was complete, **10b** was obtained as a mixture of diastereoisomers (92% yield, d.r. = 79:21). These isomers could be separated by column chromatography on  $\text{SiO}_2$  with hexane/AcOEt ( $v/v = 20/1$  to  $4/1$ ) as an eluent.

**10b** (major); a colorless oil; IR (neat) 646, 697, 767, 923, 1000, 1294, 1443, 1669 ( $\text{C}=\text{O}$ ), 2359, 2932, 3507  $\text{cm}^{-1}$ ;  $^1\text{H}$  NMR (300 MHz,  $\text{CD}_2\text{Cl}_2$ , 25 °C)  $\delta$  1.30–1.49 (m, 2H), 1.58–1.69 (m, 2H), 1.71–2.12 (m, 5H), 2.21–2.28 (m, 1H), 2.68 (dd,  $J = 5.4$ ,

10.8 Hz, 1H), 2.84–3.02 (m, 3H), 3.14 (dd,  $J = 9.5, 10.8$  Hz, 1H), 4.36 (d,  $J = 17.0$  Hz, 1H), 4.73 (s, 1H), 4.75 (d,  $J = 10.3$  Hz, 1H), 5.55 (tdd,  $J = 7.6, 10.3, 17.0$  Hz, 1H), 7.40 (dd,  $J = 7.5, 7.5$  Hz, 2H), 7.50 (dd,  $J = 7.5, 7.5$  Hz, 1H), 7.82 (d,  $J = 7.5$  Hz, 2H);  $^{13}\text{C}$  NMR (75 MHz,  $\text{CD}_2\text{Cl}_2$ , 25 °C)  $\delta$  22.5, 22.8, 23.2, 25.3, 36.2, 38.3, 38.9, 49.7, 64.1, 78.8, 103.7, 118.5, 128.2, 128.9, 131.5, 133.1, 138.6, 139.8, 143.4, 198.3. HRMS (FAB): calcd for  $\text{C}_{22}\text{H}_{25}\text{O}_2\text{S}$  ( $\text{M}+\text{H}^+$ ), 353.1575; found, 353.1575.

**10b** (minor); a yellow oil; IR (neat) 639, 696, 921, 1003, 1230, 1445, 1597, 1667 ( $\text{C}=\text{O}$ ), 2923, 3422  $\text{cm}^{-1}$ ;  $^1\text{H}$  NMR (300 MHz,  $\text{CD}_2\text{Cl}_2$ , 25 °C)  $\delta$  1.48–1.64 (m, 4H), 1.74–1.77 (m, 2H), 1.87–2.00 (m, 1H), 2.17–2.31 (m, 2H), 2.48–2.55 (m, 2H), 2.66–2.76 (m, 2H), 3.14 (dd,  $J = 8.4, 10.8$  Hz, 1H), 3.45 (dd,  $J = 7.2, 13.2$  Hz, 1H), 4.69 (d,  $J = 3.9$  Hz, 1H), 5.03 (d,  $J = 17.1$  Hz, 1H), 5.07 (d,  $J = 10.2$  Hz, 1H), 5.76 (tdd,  $J = 6.9, 10.2, 17.1$  Hz, 1H), 7.34 (dd,  $J = 7.2, 7.2$  Hz, 2H), 7.43 (dd,  $J = 7.2, 7.2$  Hz, 1H), 7.66 (d,  $J = 7.2$  Hz, 2H);  $^{13}\text{C}$  NMR (75 MHz,  $\text{CD}_2\text{Cl}_2$ , 25 °C)  $\delta$  22.3, 22.9, 23.6, 24.4, 36.2, 37.7, 43.2, 49.6, 71.8, 80.8, 104.6, 119.3, 127.7, 128.6, 131.1, 133.8, 138.5, 140.1, 144.5, 201.7. HRMS (FAB): calcd for  $\text{C}_{22}\text{H}_{25}\text{O}_2\text{S}$  ( $\text{M}+\text{H}^+$ ), 353.1575; found, 353.1573.

### Sulfide **10c**.

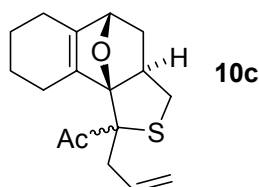

After the reaction of **1c** at 80 °C was complete, **10c** was obtained as a mixture of diastereoisomers (80% yield, d.r. = 67:33). These isomers could be separated by column chromatography on  $\text{SiO}_2$  with hexane/ $\text{AcOEt}$  ( $v/v = 20/1$  to  $4/1$ ) as an eluent.

**10c** (major); A yellow oil; IR (neat) 843, 920, 1185, 1360, 1440, 1675, 1690 ( $\text{C}=\text{O}$ ), 2856, 2925, 3414  $\text{cm}^{-1}$ ;  $^1\text{H}$  NMR (300 MHz,  $\text{CD}_2\text{Cl}_2$ , 25 °C)  $\delta$  1.33–1.48 (m, 2H), 1.62–1.70 (m, 2H), 1.73–1.78 (m, 2H), 1.81–1.88 (m, 2H), 1.93–1.98 (m, 1H), 2.15–2.28 (m, 1H), 2.32 (s, 3H), 2.64–2.72 (m, 2H), 2.78 (tdd,  $J = 5.4, 6.9, 9.3$  Hz, 1H), 2.93 (dd,  $J = 5.4, 14.4$  Hz, 1H), 3.11 (dd,  $J = 9.3, 10.2$  Hz, 1H), 4.67 (d,  $J = 4.5$  Hz, 1H), 5.06 (d,  $J = 10.2$  Hz, 1H), 5.16 (d,  $J = 17.1$  Hz, 1H), 5.78 (tdd,  $J = 7.2, 10.2, 17.1$  Hz, 1H);  $^{13}\text{C}$  NMR (75 MHz,  $\text{CD}_2\text{Cl}_2$ , 25 °C)  $\delta$  22.4, 22.8, 23.1, 25.1, 25.8, 35.8,

37.3, 39.1, 49.5, 65.8, 78.7, 102.4, 118.4, 134.3, 139.3, 143.8, 202.0. HRMS (FAB): calcd for C<sub>17</sub>H<sub>22</sub>O<sub>2</sub>S (M<sup>+</sup>), 290.1341; found, 290.1339.

**10c** (minor); A white solid; mp. 87.2-89.0 °C; IR (KBr) 649, 668, 678, 871, 924, 1071, 1123, 1450, 1535, 1635 (C=O), 2341, 2360, 2929, 3443 cm<sup>-1</sup>; <sup>1</sup>H NMR (300 MHz, CD<sub>2</sub>Cl<sub>2</sub>, 25 °C)  $\delta$  1.41–1.62 (m, 4H), 1.71–1.76 (m, 3H), 1.86–1.90 (m, 1H), 2.11–2.16 (m, 1H), 2.23 (s, 3H), 2.42–2.55 (m, 3H), 2.70 (dd, *J* = 7.5, 10.8 Hz, 1H), 3.16 (dd, *J* = 8.4, 10.8 Hz, 1H), 3.29 (dd, *J* = 6.9, 13.5 Hz, 1H), 4.66 (d, *J* = 3.6 Hz, 1H), 5.09 (d, *J* = 10.5 Hz, 1H), 5.13 (d, *J* = 17.1 Hz, 1H), 5.75 (tdd, *J* = 6.9, 10.5, 17.1 Hz, 1H); <sup>13</sup>C NMR (75 MHz, CD<sub>2</sub>Cl<sub>2</sub>, 25 °C)  $\delta$  22.2, 22.8, 23.5, 24.4, 29.7, 35.6, 38.1, 41.7, 48.6, 72.0, 80.4, 104.0, 118.8, 134.0, 137.6, 145.4, 206.0. HRMS (FAB): calcd for C<sub>17</sub>H<sub>22</sub>O<sub>2</sub>S (M<sup>+</sup>), 290.1341; found, 290.1340.

#### Sulfide **10d**.

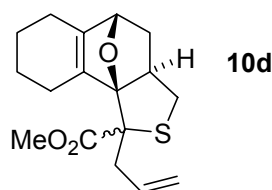

After the reaction of **1d** at reflux temperature of CH<sub>2</sub>Cl<sub>2</sub> was complete, **10d** was obtained as a mixture of diastereoisomers (90% yield, d.r. = 73:27). These isomers could be separated by column chromatography on SiO<sub>2</sub> with hexane/AcOEt (v/v = 10/1 to 4/1) as an eluent.

**10d**(major); a colorless oil; IR (neat) 698, 917, 976, 1003, 1130, 1219, 1436, 1731 (C=O), 2938, 3443 cm<sup>-1</sup>; <sup>1</sup>H NMR (400 MHz, CD<sub>2</sub>Cl<sub>2</sub>, 25 °C)  $\delta$  1.37–1.53 (m, 2H), 1.59–1.99 (m, 7H), 2.17–2.28 (m, 1H), 2.70–2.75 (m, 3H), 2.83–2.91 (m, 1H), 3.31 (dd, *J* = 9.6, 9.6 Hz, 1H), 3.73 (s, 3H), 4.71 (d, *J* = 4.5 Hz, 1H), 5.00 (d, *J* = 10.2 Hz, 1H), 5.12 (d, *J* = 17.1 Hz, 1H), 5.87 (tdd, *J* = 7.2, 10.2, 17.1 Hz, 1H); <sup>13</sup>C NMR (100 MHz, CD<sub>2</sub>Cl<sub>2</sub>, 25 °C)  $\delta$  22.3, 22.6, 22.9, 23.1, 36.6, 37.4, 38.7, 50.0, 52.3, 59.7, 79.4, 102.6, 118.2, 134.8, 138.3, 144.3, 173.2. HRMS (FAB): calcd for C<sub>17</sub>H<sub>22</sub>O<sub>3</sub>S (M<sup>+</sup>), 306.1290; found, 306.1290.

**10d**(minor); a yellow oil; IR (neat) 917, 992, 1126, 1226, 1267, 1433, 1731 (C=O), 2934, 3478 cm<sup>-1</sup>; <sup>1</sup>H NMR (300 MHz, CD<sub>2</sub>Cl<sub>2</sub>, 25 °C)  $\delta$  1.43–1.77 (m, 7H), 2.03–2.16 (m, 1H), 2.18–2.29 (m, 1H), 2.37–2.48 (m, 1H), 2.52 (dd, *J* = 6.3, 13.2 Hz, 2H),

2.66 (dd,  $J = 6.3, 11.1$  Hz, 1H), 3.15 (dd,  $J = 9.0, 11.1$  Hz, 1H), 3.23 (dd,  $J = 7.5, 13.2$  Hz, 1H), 3.65 (s, 3H), 4.65 (d,  $J = 4.2$  Hz, 1H), 5.12 (d,  $J = 10.2$  Hz, 1H), 5.15 (d,  $J = 17.1$  Hz, 1H), 5.87 (tdd,  $J = 6.3, 10.2, 17.1$  Hz, 1H);  $^{13}\text{C}$  NMR (75 MHz,  $\text{CD}_2\text{Cl}_2$ , 25 °C)  $\delta$  22.3, 22.7, 23.4, 24.1, 34.7, 38.8, 41.9, 47.7, 52.7, 67.2, 80.0, 103.6, 118.8, 133.9, 138.1, 144.4, 171.1. HRMS (FAB): calcd for  $\text{C}_{17}\text{H}_{22}\text{O}_3\text{S}$  ( $\text{M}^+$ ), 306.1290; found, 306.1293.

#### Sulfide 12b.

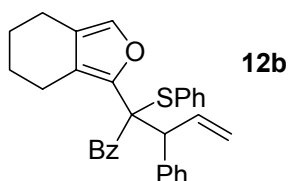

A colorless oil [purified by column chromatography on  $\text{SiO}_2$  with hexane/ $\text{AcOEt}$  ( $v/v = 30/1$ ), 99% yield]; IR (neat) 700, 747, 918, 971, 1024, 1182, 1226, 1446, 1595, 1673 ( $\text{C}=\text{O}$ ), 2853, 2934, 3052  $\text{cm}^{-1}$ ;  $^1\text{H}$  NMR (300 MHz,  $d_8$ -THF, 25 °C)  $\delta$  1.14–1.23 (m, 1H), 1.38–1.51 (m, 3H), 1.76–1.83 (m, 1H), 2.24–2.33 (m, 1H), 2.45–2.53 (m, 2H), 4.47 (d,  $J = 7.2$  Hz, 1H), 4.80 (d,  $J = 16.8$  Hz, 1H), 4.92 (d,  $J = 10.2$  Hz, 1H), 6.16 (ddd,  $J = 7.2, 10.2, 16.8$  Hz, 1H), 6.97 (s, 1H), 7.16–7.38 (m, 13H), 7.72 (d,  $J = 7.5$  Hz, 2H);  $^{13}\text{C}$  NMR (75 MHz,  $d_8$ -THF, 25 °C)  $\delta$  19.3, 21.8, 22.1, 22.3, 55.1, 64.6, 115.5, 120.9, 122.3, 125.7, 126.5, 126.7, 127.6, 128.4, 128.8, 130.1, 130.3, 130.8, 135.7, 135.9, 136.5, 138.8, 139.3, 142.7, 190.7. HRMS (FAB): calcd for  $\text{C}_{31}\text{H}_{29}\text{O}_2\text{S}$  ( $\text{M}+\text{H}^+$ ), 465.1888; found, 465.1887.

#### Sulfide 12d.

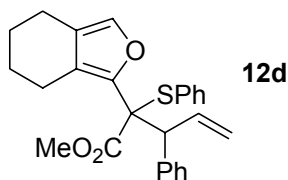

A colorless oil [purified by column chromatography on  $\text{SiO}_2$  with hexane/ $\text{AcOEt}$  ( $v/v = 25/1$ ), 93% yield]; IR (neat) 700, 753, 919, 1025, 1065, 1233, 1437, 1600, 1731 ( $\text{C}=\text{O}$ ), 2926, 3076  $\text{cm}^{-1}$ ;  $^1\text{H}$  NMR (270 MHz,  $\text{CD}_2\text{Cl}_2$ , 25 °C)  $\delta$  1.19–1.38 (m, 2H), 1.40–1.49 (m, 2H), 1.56–1.67 (m, 1H), 1.86–1.94 (m, 1H), 2.38–2.42 (m, 2H), 3.36 (s, 3H), 4.35 (d,  $J = 8.9$  Hz, 1H), 5.07 (d,  $J = 18.1$  Hz, 1H), 5.09 (d,  $J = 10.0$  Hz, 1H),

6.35 (ddd,  $J = 8.9, 10.0, 18.1$  Hz, 1H), 6.90 (s, 1H), 7.07–7.23 (m, 10H);  $^{13}\text{C}$  NMR (75 MHz,  $\text{CD}_2\text{Cl}_2$ , 25 °C)  $\delta$  20.7, 22.7, 23.1, 23.6, 52.2, 57.9, 65.5, 118.0, 122.6, 123.2, 127.2, 127.8, 128.5, 129.2, 130.0, 132.1, 135.7, 136.5, 137.9, 139.8, 143.1, 169.1. HRMS (FAB): calcd for  $\text{C}_{26}\text{H}_{27}\text{O}_3\text{S}$  ( $\text{M}+\text{H}^+$ ), 419.1681; found, 419.1676.

## References

- Pajamannar, T.; Balasubramanian, K. K. *Tetrahedron Lett.* **1988**, 29, 5789.
- (a) Ohe, K.; Miki, K.; Yokoi, T.; Nishino, F.; Uemura, S. *Organometallics* **2000**, 19, 5525. (b) Miki, K.; Yokoi, T.; Nishino, F.; Ohe, K.; Uemura, S. *J. Organomet. Chem.* **2002**, 645, 228. Also see: (c) Herndon, J. W.; Wang, H. *J. Org. Chem.* **1998**, 63, 4564.

C:\WINNR98\COMMON\\_DEFAULT.ALS  
TMS-ald

MENUF NON  
OBNUC 1H  
OFR  
OBSET  
OBFIN  
PW1  
DEADT  
PREDL  
TWT  
POINT  
SFO  
TIMES  
SCANS  
DUMMY  
FREQU  
FLT  
DELAY  
ACQTM  
PD  
ADBIT  
RGAIN  
BF  
T1  
T2  
T3  
T4  
EXMOD  
EXPCM  
IRNUC  
IRFR  
IRSET  
IRFIN  
IRRPW  
IRATN  
DFILE  
SF  
LKSET  
LKFIN  
LKLEV  
LGAIN  
LKPHS  
LKSIG  
CSPED  
FILDC  
FILDF

300.40 MHz  
130.00 KHz  
1150.0 Hz  
5.6 us  
97.2 us  
0.2000 ms  
1.0 sec  
32768  
32768  
16  
16  
1  
6013.2 Hz  
3000 Hz  
66.7 us  
5.449 sec  
1.551 sec  
16.00  
14  
0.10 Hz  
0.00  
0.00  
90.00  
100.00

NON  
NON:Single.coupled:PW1\_ACQTM\_PD:1H

C:\WINNR98\COMMON\\_DEFAULT.ALS  
THS

25.60 KHz  
52.0 Hz  
200  
21  
83  
681  
10 Hz

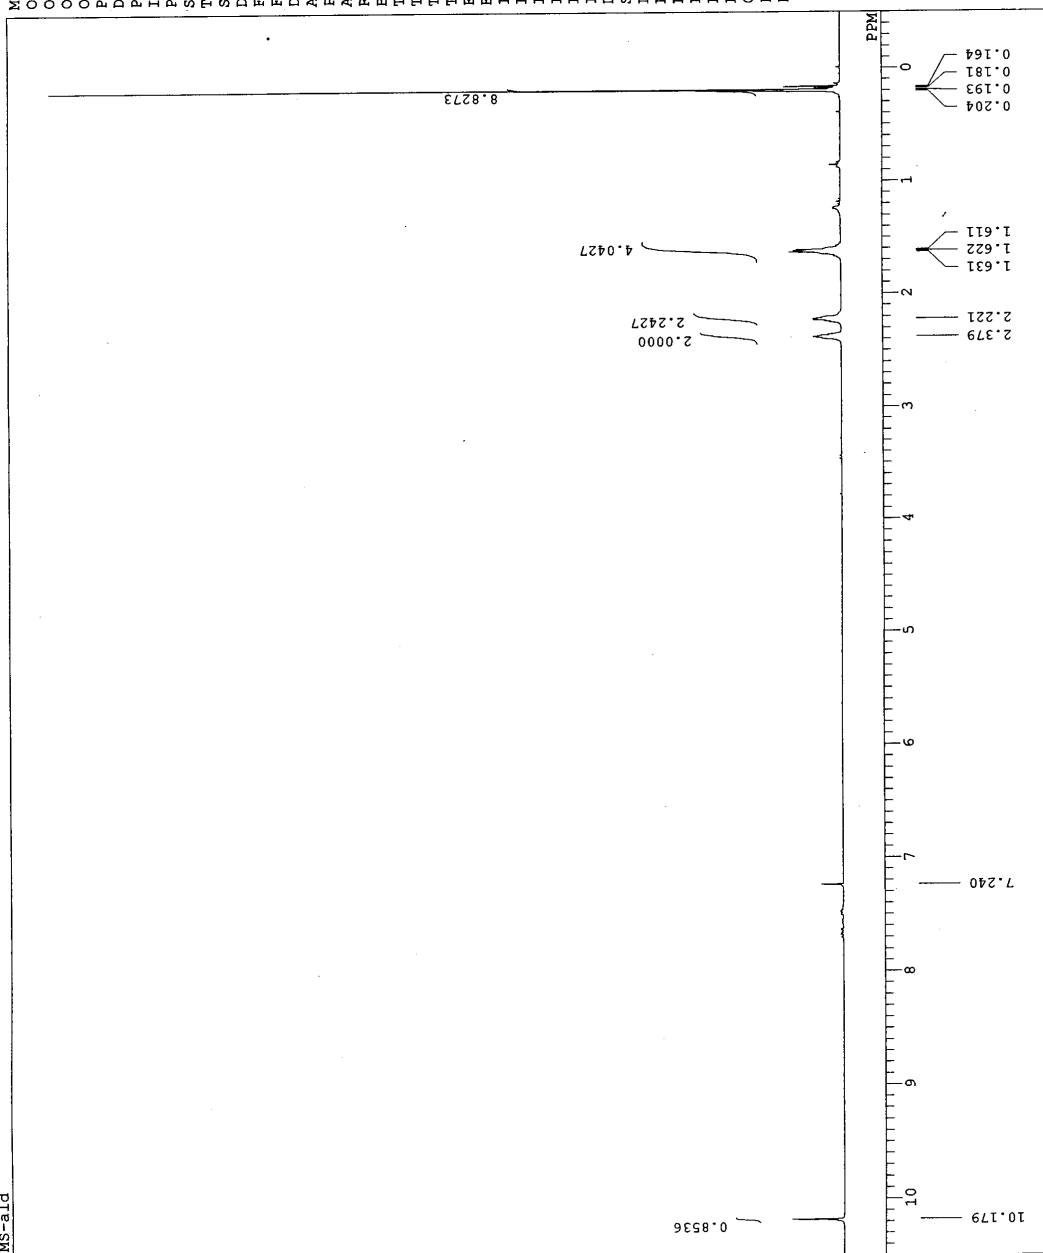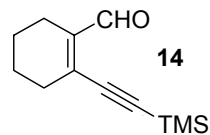

C:\WINNR98\COMMON\\_DEFAULT.ALS  
TMS-ald

MENUF BCM  
OBNUC 13C

75.45 MHz  
124.00 KHz  
1840.0 Hz  
4.5 us  
27.2 us  
0.2000 ms  
1.0 sec

POINT 32768  
SPO 32768  
TIMES 5000  
SCANS 331  
DUMMY 1

20408.1 Hz  
FREQ 10200 Hz  
FLT 19.6 us  
DELAY 1.606 sec  
AGOTM 1.394 sec  
PD 16.00  
ADBIT 24  
RGAIN 0.10 Hz

BF 0.00  
T1 0.00  
T2 0.00  
T3 90.00  
T4 100.00

BCM  
EXPCM  
Bilvel.complete.decoupling: Set\_IR  
1H

IRNUC 300.40 MHz  
IFR 130.00 KHz  
IRSET 1150.0 Hz  
IRPIN 45 us  
IRAPW 511

C:\WINNR98\COMMON\\_DEFAULT.ALS  
TH5

25.60 KHz  
52.0 Hz  
200  
21  
83  
685  
10 Hz

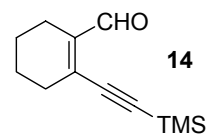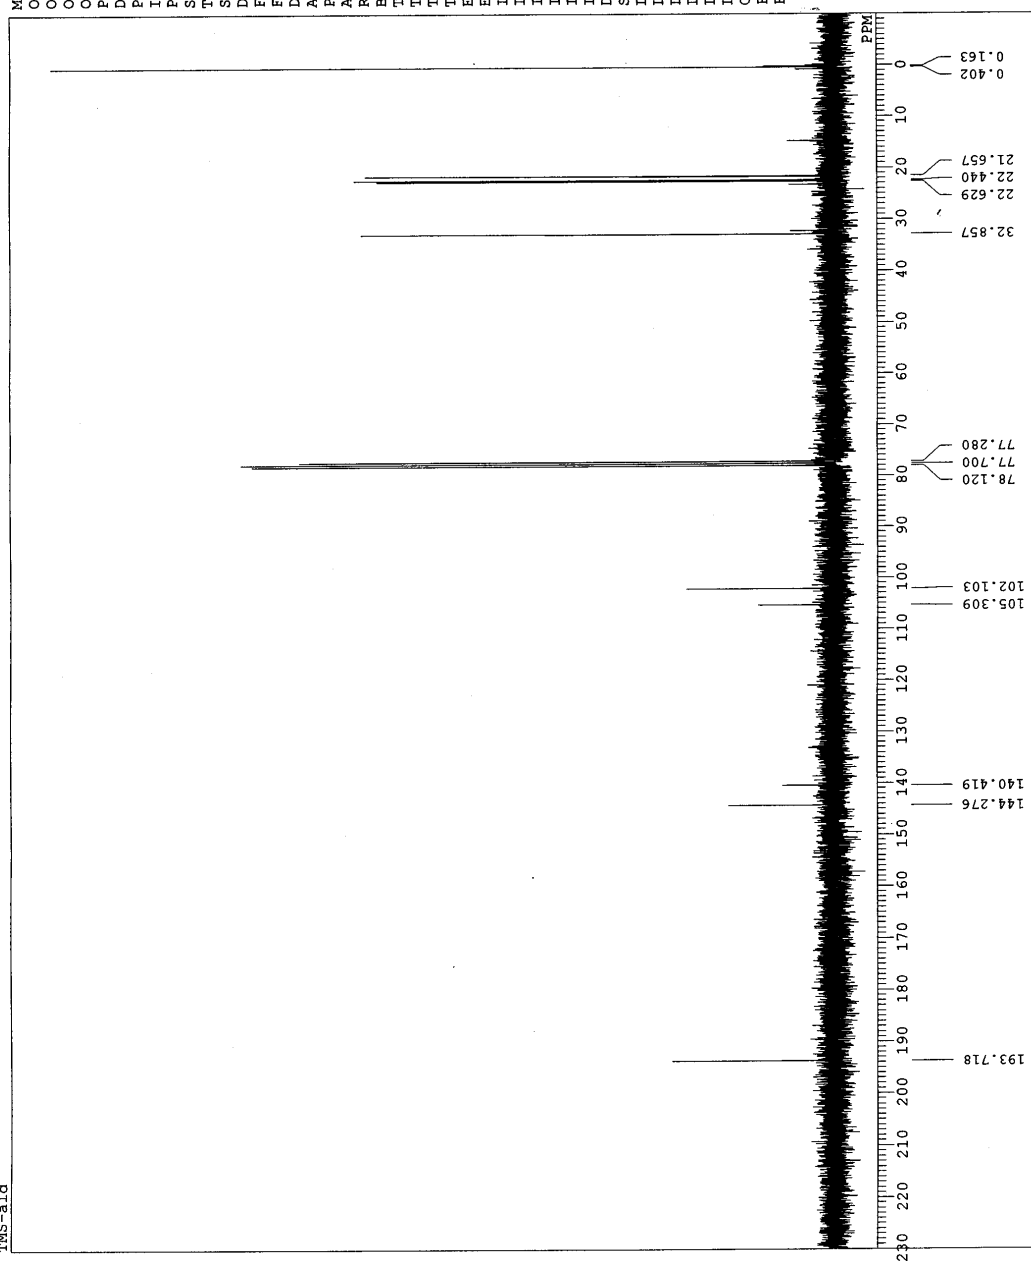

C:\WINNMR98\COMMON\\_DEFAULT.ALS  
KM-595

FILE C:\WINNMR98\COMMON\\_DEFAULT.ALS

COMNT KM-595  
DATIM Tue Jan 14 15:15:14 2003

OBNUC 1H  
EXMOD NON  
OBFREQ 270.05 MHz  
OBSET 112.00 KHz  
OBFIN 5800.0 Hz  
POINT 16384  
FREQU 5402.4 Hz  
SCANS 8  
ACQTM 3.033 sec  
PD 2.000 sec  
PWI 5.6 us  
IRNUC 1H  
CTEMP 24.7 c  
SOLVT CDCL3  
EXREF 0.00 ppm  
BF 0.12 Hz  
RGAIN 21

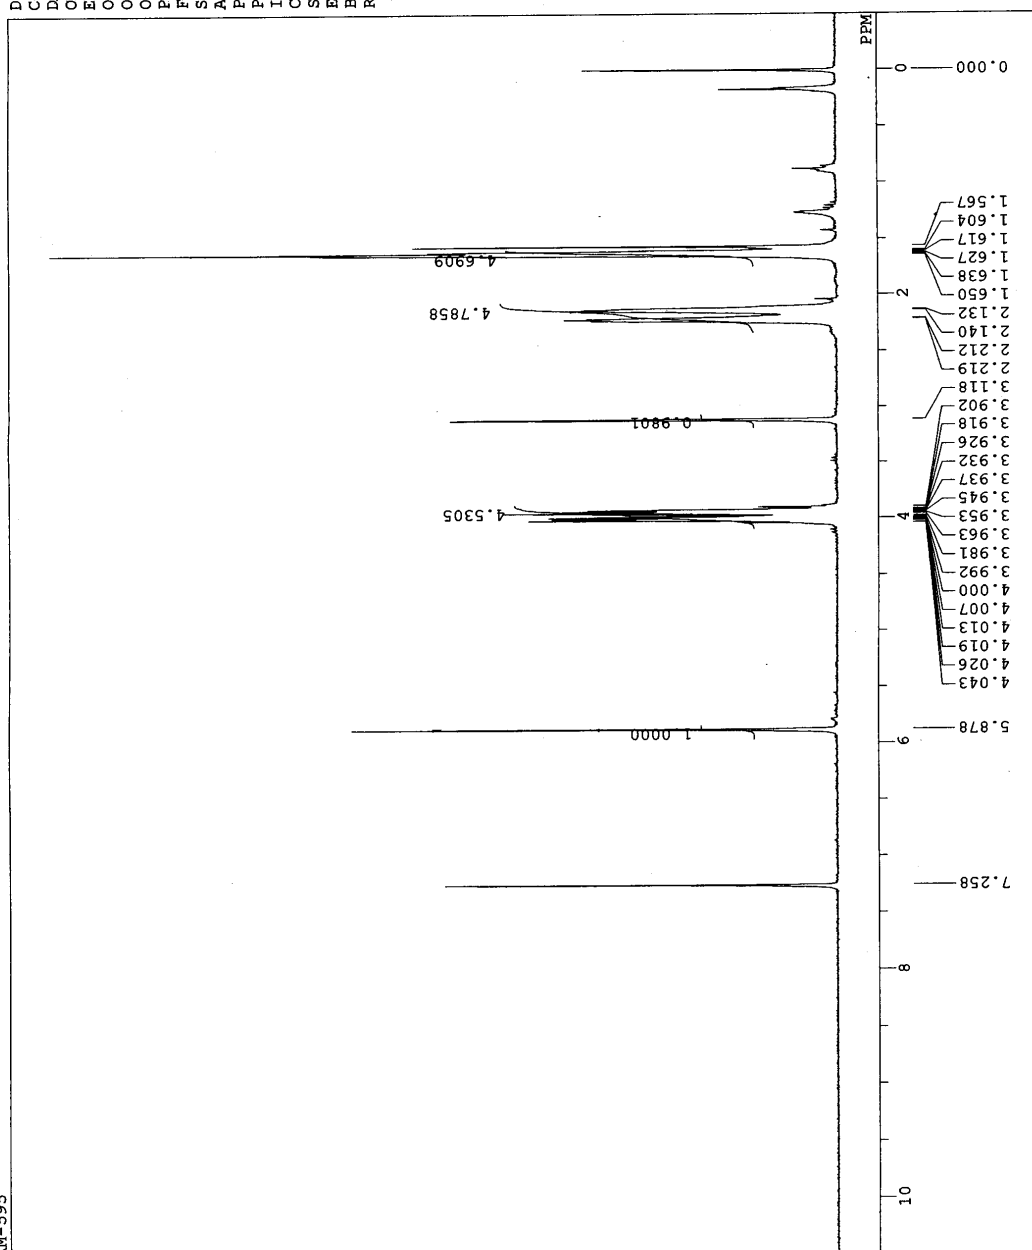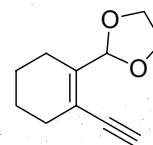

15



C:\WINNMR98\COMMON\DEFAULT.ALS  
KM-595

DEFILE C:\WINNMR98\COMMON\DEFAULT.ALS  
COMNT KM-595  
DATIM Tue Jan 14 15:56:06 2003  
OENUC 13C  
EXMOD BCM  
OBFRQ 67.80 MHz  
OBSET 135.00 KHz  
OBFIN 5200.0 Hz  
POINT 32768  
FREQU 18315.0 Hz  
SCANS 805  
ACQTM 1.789 sec  
PD 1.211 sec  
PW1 4.2 us  
IRNUC 1H  
CTEMP 25.4 C  
SIVNT CDCL3  
EXREF 77.00 ppm  
BF 0.12 Hz  
RGAIN 28

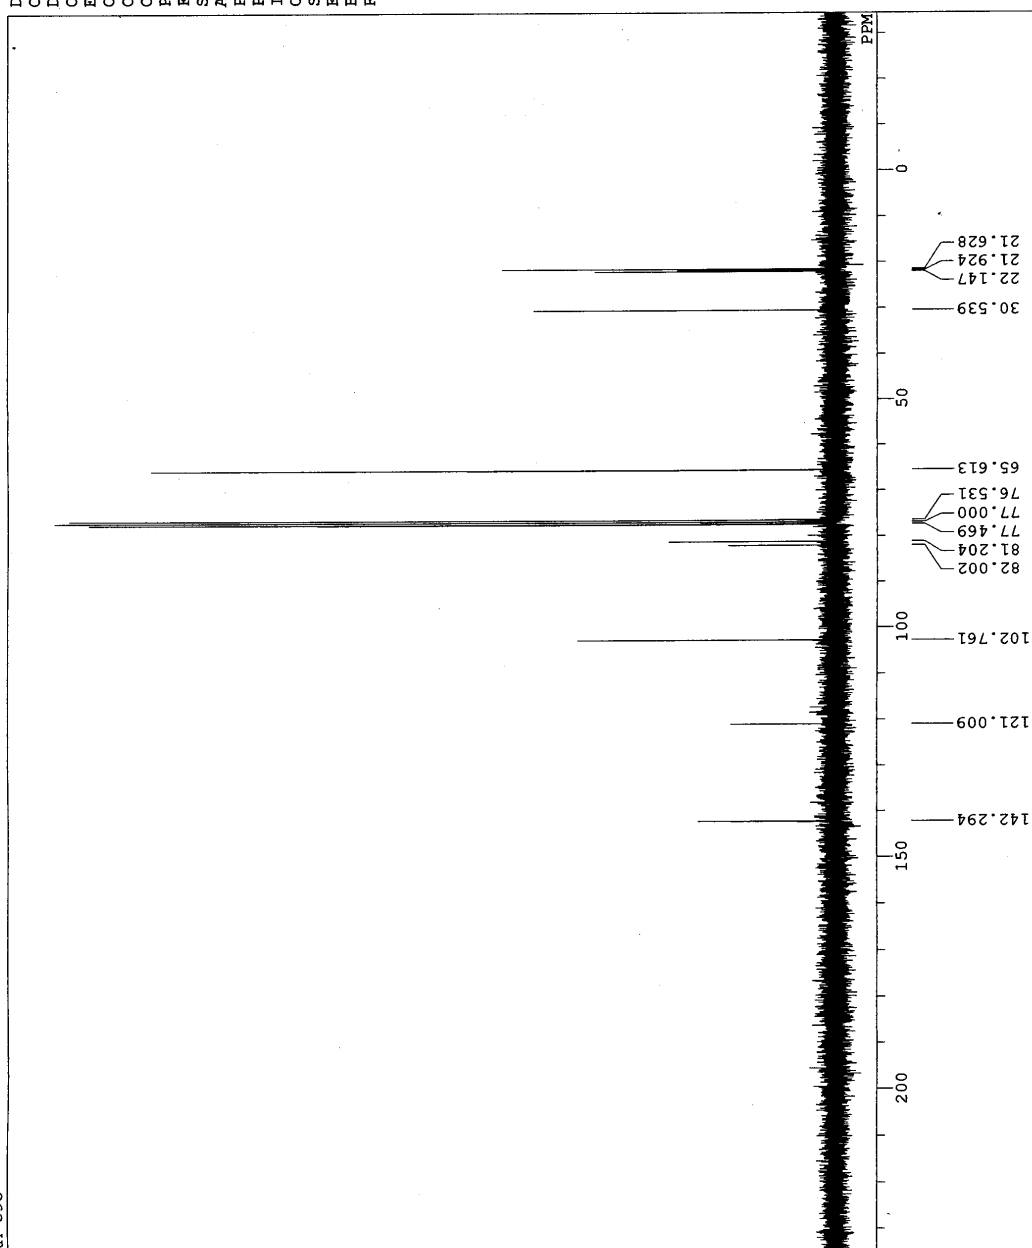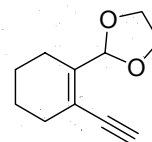

15

DFILE  
COMNT  
DATIM  
OBNUC  
EXMOD  
OBFREQ  
OBSET  
OBFIN  
POINT  
FREQU  
SCANS  
ACQTM  
PD  
PWL  
IRNUC  
CTEMP  
SLVNT  
EXREF  
BF  
RGAIN

C:\WINNR98\COMMON\\_DEFAULT.ALS

Sat Nov 23 00:00:23 2002

1H  
NON  
270.05 MHz  
112.00 KHz  
5800.0 Hz  
16384  
5402.4 Hz  
16  
3.033 sec  
2.000 sec  
5.6 us  
1H  
23.7 c  
CDCL3  
0.00 ppm  
1.20 Hz  
24

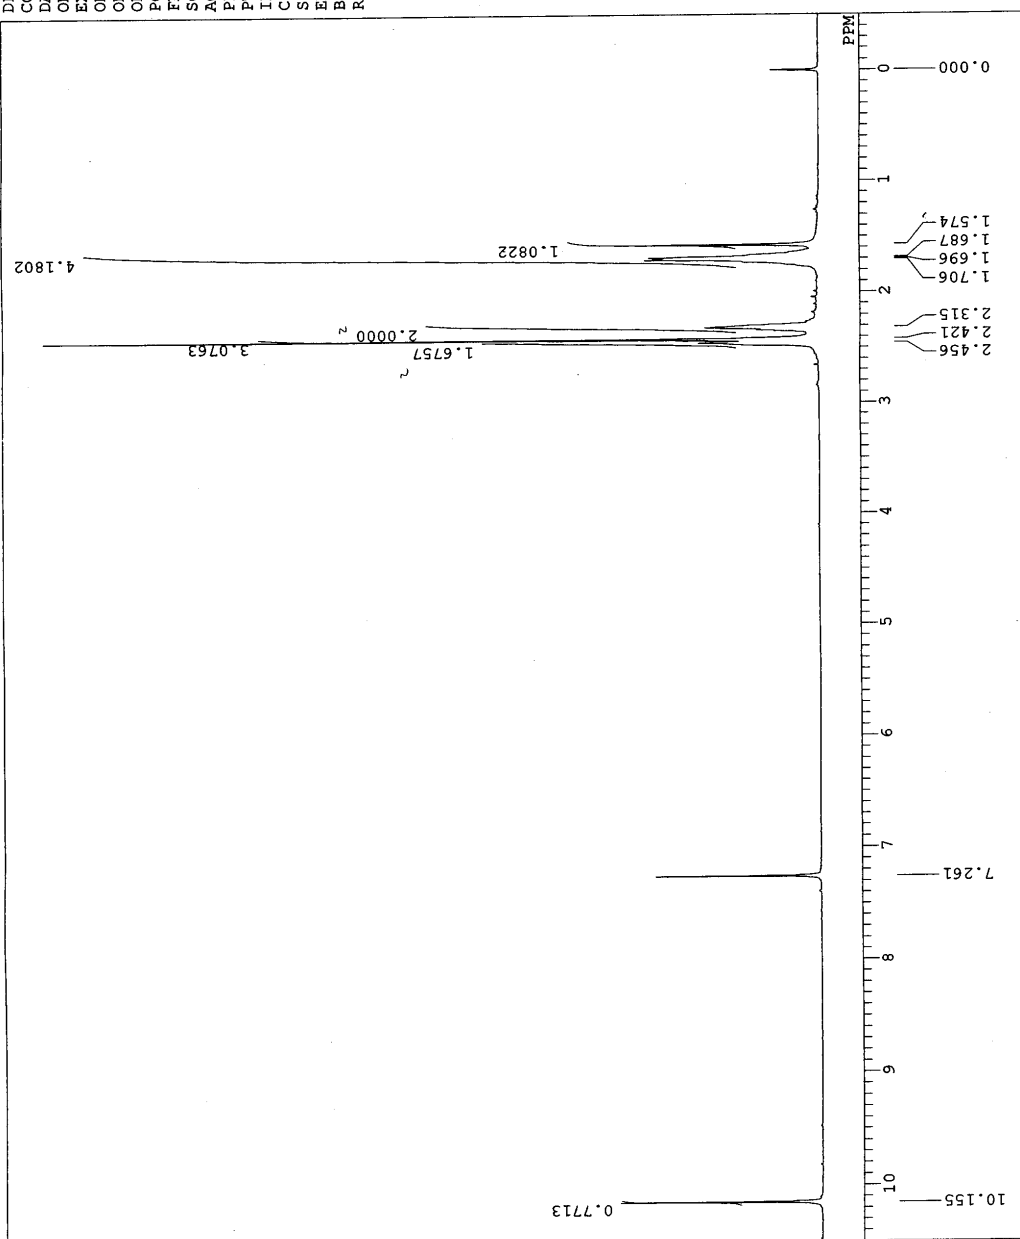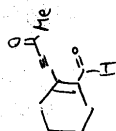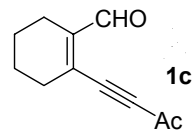

D:\FILE C:\WINNMR98\COMMON\\_DEFAULT.ALS

COMNT  
DATIM Fri Nov 22 23:56:37 2002

OBNUC 13C  
EXMOD BCM  
OBFRQ 67.80 MHz  
OBSET 135.00 KHz  
OBFIN 5200.0 Hz  
POINT 32768  
FREQU 18315.0 Hz  
SCANS 850  
ACQTM 1.789 sec  
PD 1.211 sec  
PW1 4.2 us  
IRNUC 1H  
CTEMP 23.7 c  
SLVNT CDCL3  
EXREF 77.00 ppm  
BF 1.20 Hz  
RGAIN 28

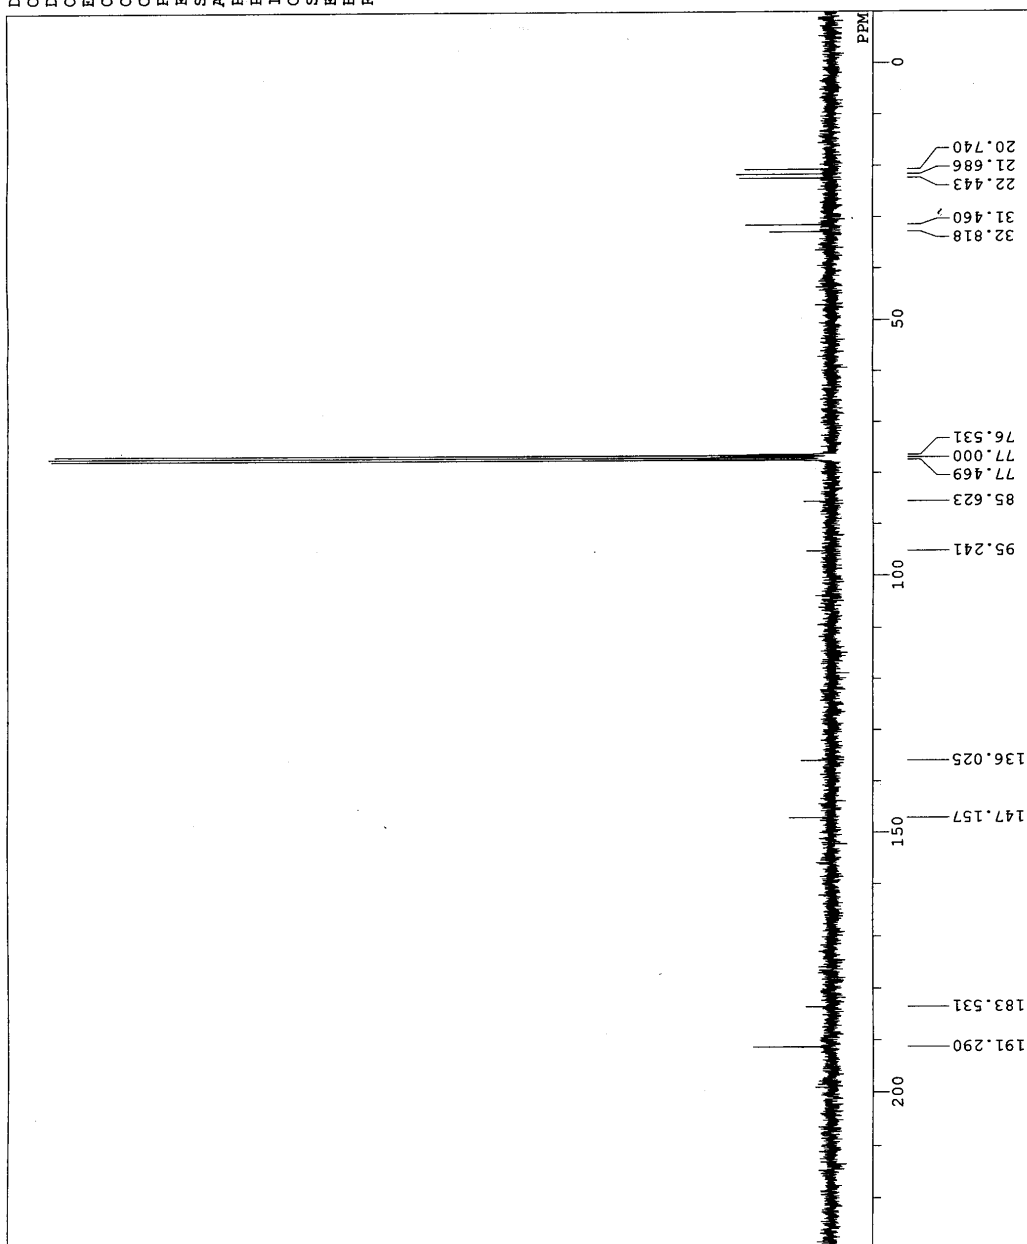

C:\WINNR98\COMMON\DEFAULT.ALS  
KM-597

C:\WINNR98\COMMON\DEFAULT.ALS

COMNT KM-597  
DATIM Wed Jan 15 01:07:43 2003

OBNUC 1H  
EXMOD NON  
270.05 MHz  
OBFREQ 112.00 KHz  
OBFREQ 5800.0 Hz  
OBFREQ 16384  
POINT 5402.4 Hz  
FREQU 8  
SCANS 3.033 sec  
ACQTM 2.000 sec  
PD 5.6 us  
PWL 1H  
IRNUC 1H  
CTEMP 24.6 c  
SLVNT CDCL3  
EXREF 0.00 ppm  
BF 0.12 Hz  
RGAIN 20

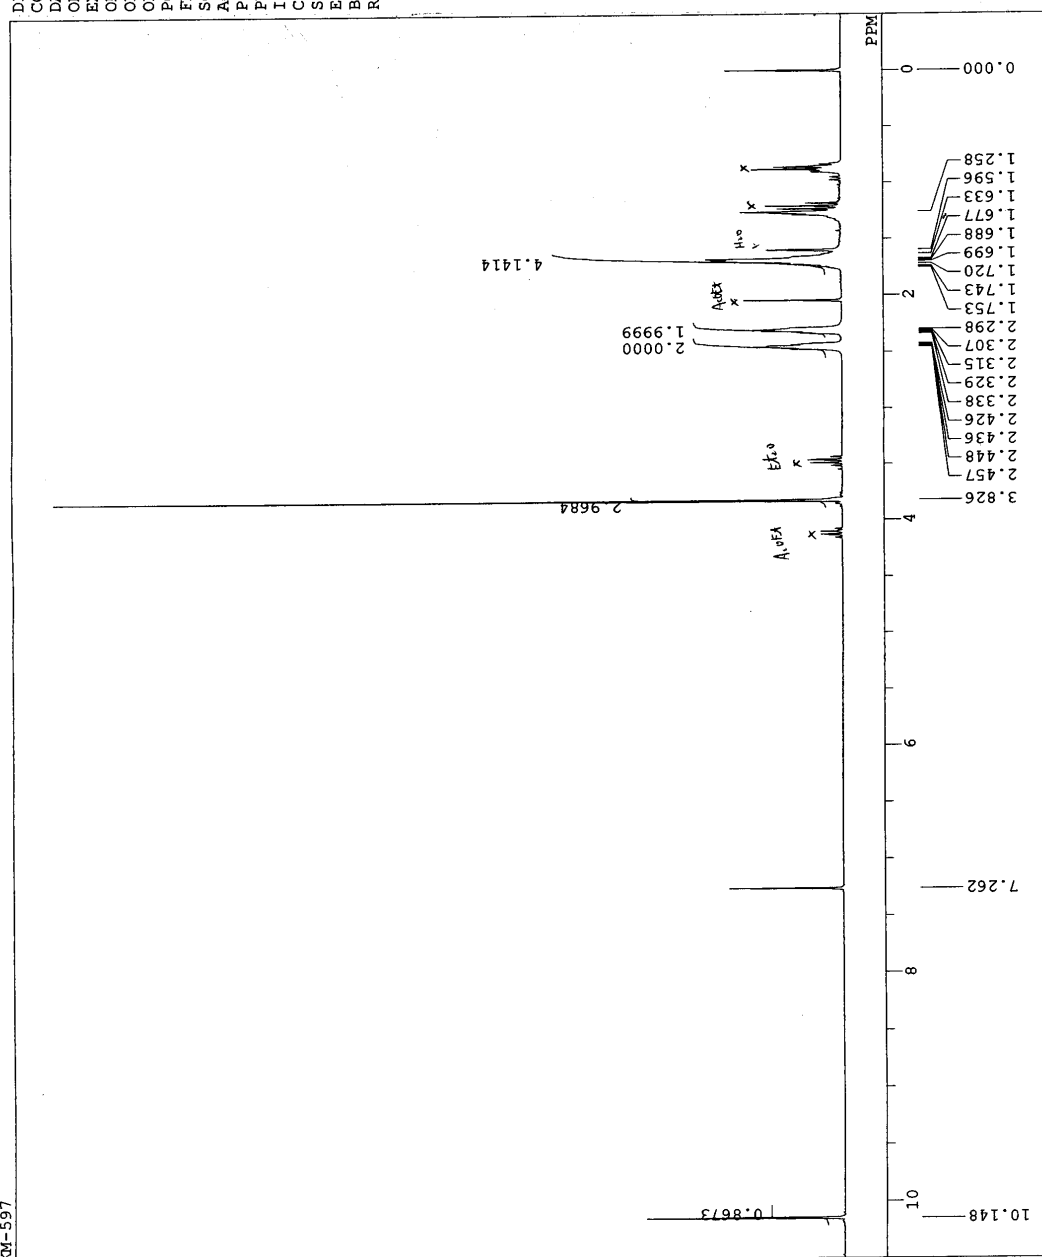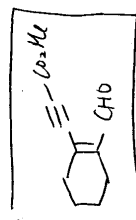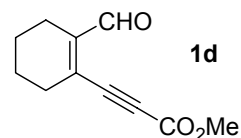

C:\WINNMR98\COMMON\\_DEFAULT.ALS  
KM-597

D:\FILE C:\WINNMR98\COMMON\\_DEFAULT.ALS

COMET KM-597  
DATIM Wed Jan 15 01:59:02 2003

ORNUC 13C  
EXMOD BCM

OBFRQ 67.80 MHz  
OBSET 135.00 KHz

OBFIN 5200.0 Hz  
POINT 32768

FREQ 18315.0 Hz  
SCANS 1015

ACQTM 1.789 sec  
PD 1.211 sec

PW1 4.2 us  
IRNUC 1H

CTEMP 25.2 C  
SLVNT CDCL3

EXREF 77.00 ppm  
BF 0.12 Hz

RGAIN 28

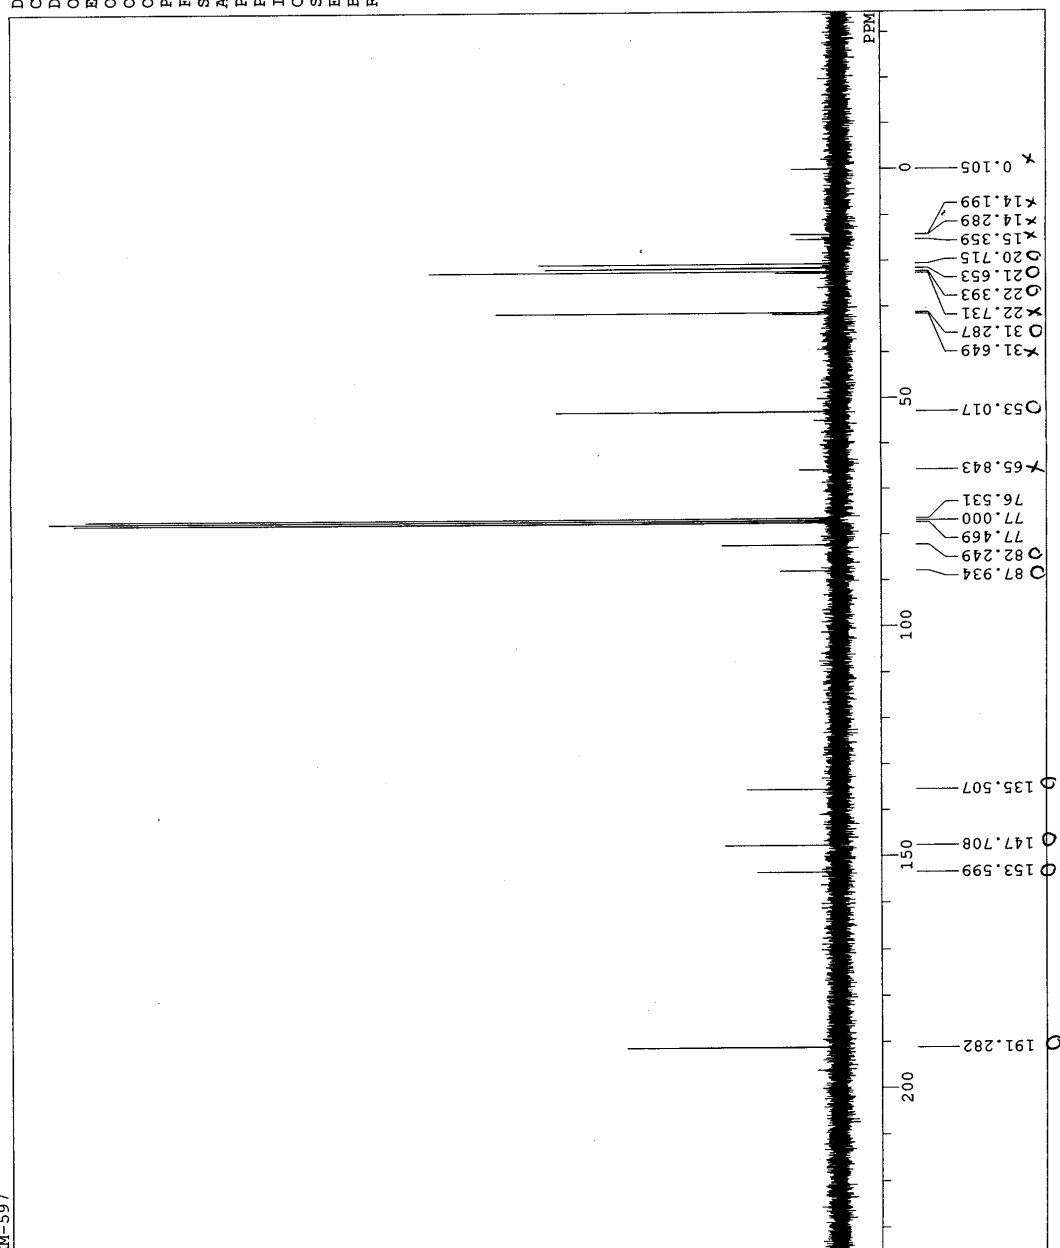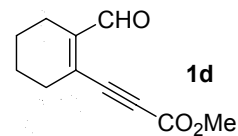

C:\WINNR98\COMMON\\_DEFAULT.ALS  
S-allyl-H-Cr-kato

C:\WINNR98\COMMON\\_DEFAULT.ALS

DEFILE  
COMPT S-allyl-H-Cr-kato  
DATIM Wed Dec 19 01:02:26 2001  
OBNUC 1H  
EXMOD NON  
OBFRQ 399.65 MHz  
OBSET 124.00 KHz  
OBFIN 10500.0 Hz  
POINT 16384  
FREQU 8000.0 Hz  
SCANS 8  
ACQTM 2.048 sec  
PD 2.952 sec  
PWL 8.5 us  
IRNUC 1H  
CTEMP 25.1 c  
SLVNT CDCL3  
EXREF 0.00 ppm  
BF 0.12 Hz  
RGAIN 17

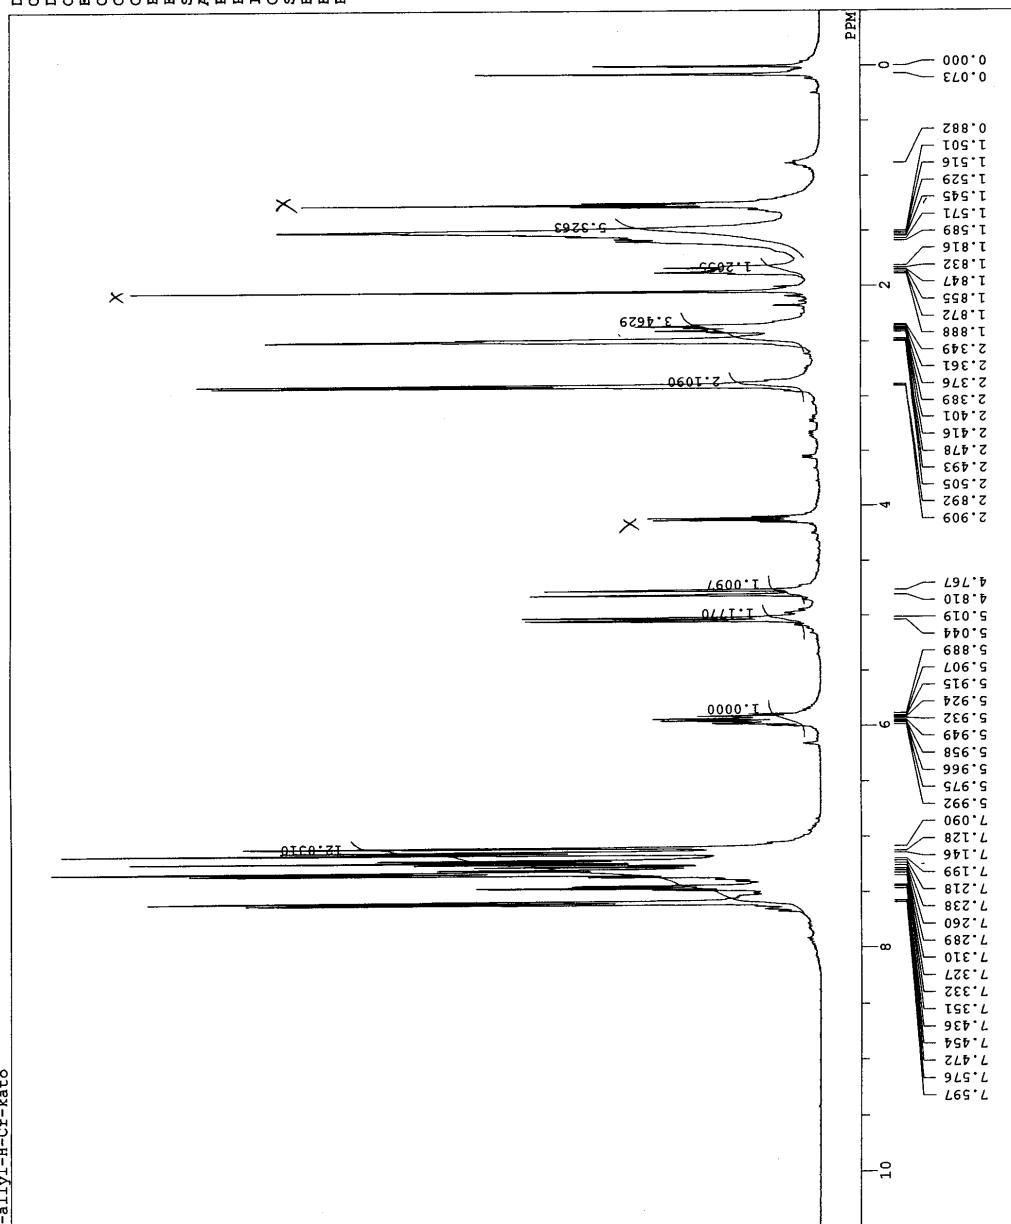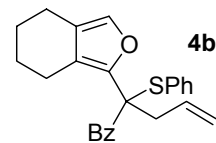

C:\WINMR98\COMMON\\_DEFAULT.ALS  
S-allyl-H-Cr-kato

DFILE C:\WINMR98\COMMON\\_DEFAULT.ALS  
 COMNT S-allyl-H-Cr-kato  
 DATIM Wed Dec 19 01:30:37 2001  
 ORNUC 13C  
 EXMOD ECM  
 OBSFQ 100.40 MHz  
 OBSST 125.00 KHz  
 OBSIN 10500.0 Hz  
 POINT 32768  
 FREQU 27173.9 Hz  
 SCANS 447  
 ACQTM 1.206 sec  
 PD 1.794 sec  
 PW1 5.0 us  
 IRNUC 1H  
 CTEMP 25.3 c  
 SLVNT CDCl3  
 EXREF 77.00 ppm  
 BF 0.12 Hz  
 RGAIN 33

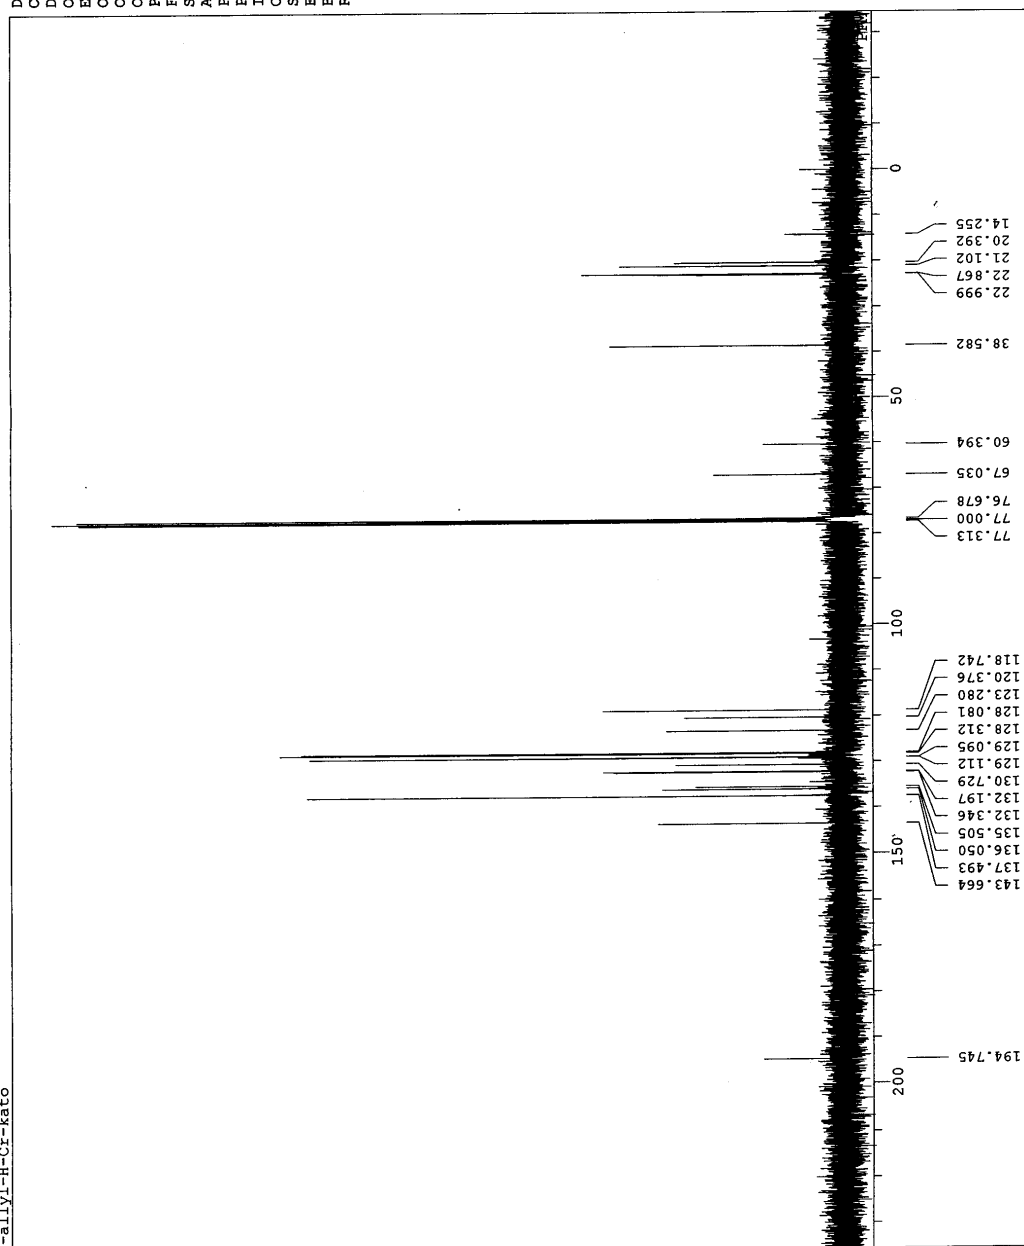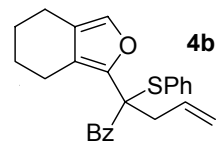

```

DFILE C:\WINMR98\COMMON\DEFAULT.ALS
COMMT 255 Ac-allylPhS-Rh-reflux
DATIM Mon Nov 25 19:55:45 2002

```

DFILE COMNT DATIM OBNUC EXMOD OBFRQ OBSET OBFIN POINT FREQU SCANS ACQTM PD PW1 IRNUC CTEMP SLVNT EXREF BF RGAIN

[illegible]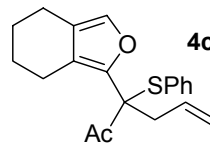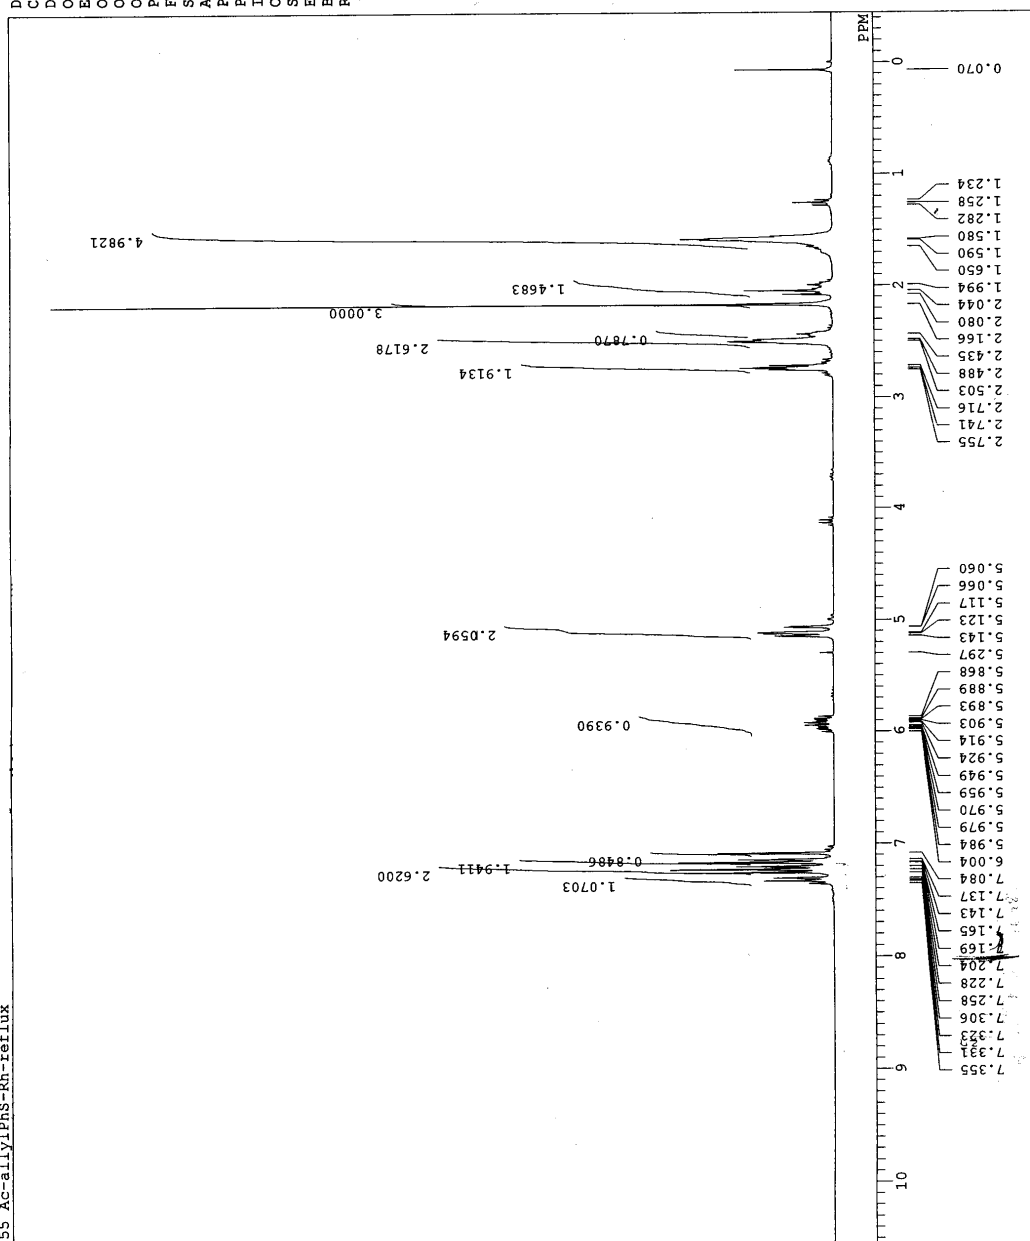



C:\WINNMR98\COMMON\\_DEFAULT.ALS  
255 Ac-allylPhS-Rh-Reflux

DFILE C:\WINNMR98\COMMON\\_DEFAULT.ALS  
COMNT 255 Ac-allylPhS-Rh-Reflux  
DATIM Mon Nov 25 20:22:32 2002

OBNUC 13C  
EXMOD BCM  
OBSFQ 75.45 MHz  
OBSRT 124.00 KHz  
OBSFV 1840.0 Hz  
POINT 32768  
FREQU 20408.1 Hz  
SCANS 400  
ACQTM 1.606 sec  
PD 1.394 sec  
PWL 4.4 us  
IRNUC 1H  
CTEMP 23.5 c  
SLVNT CDCL3  
EXREF 77.00 ppm  
BF 0.12 Hz  
RGAIN 24

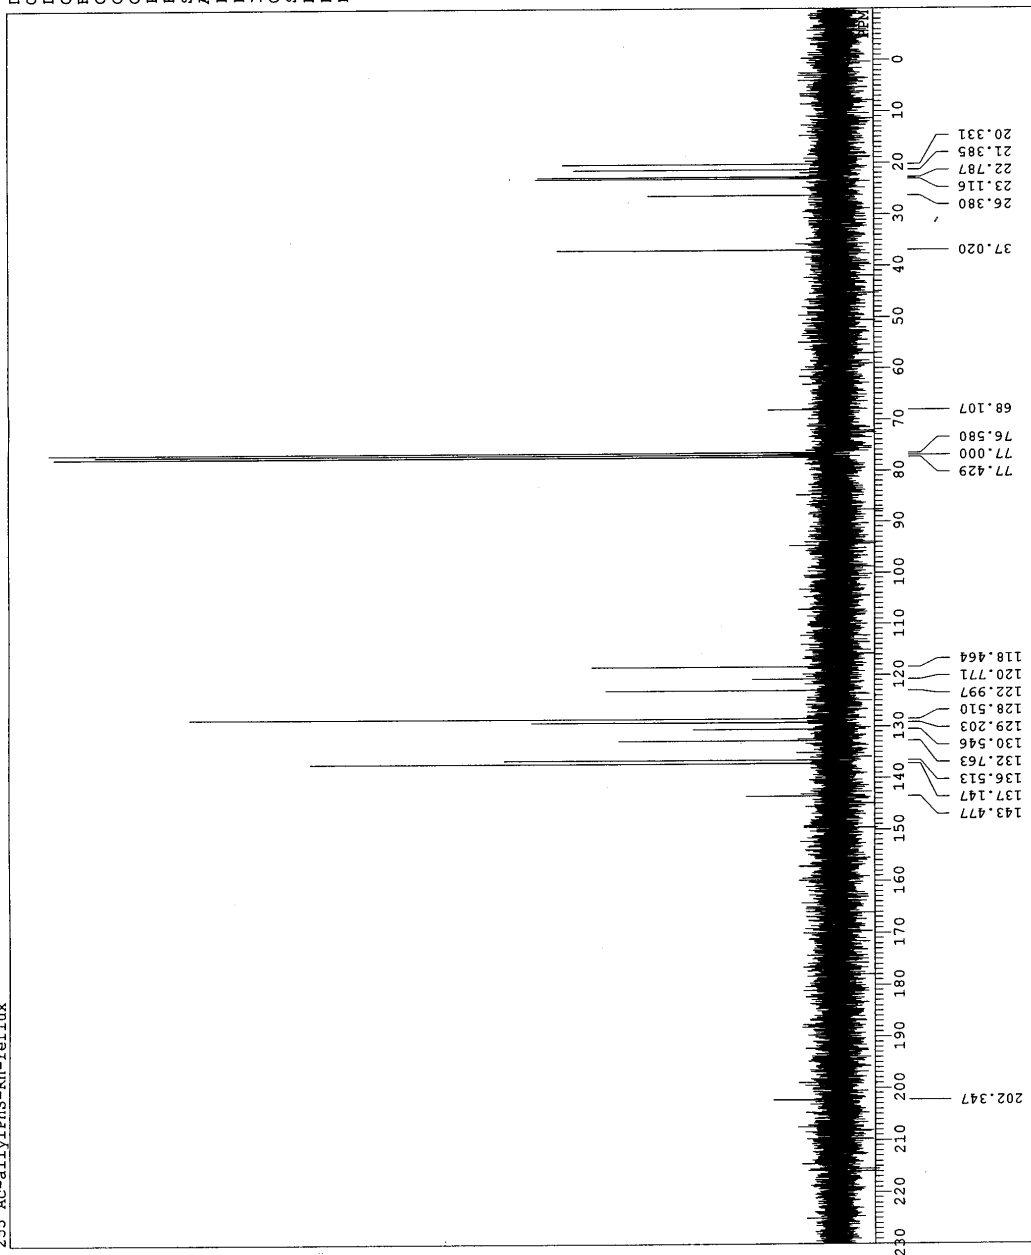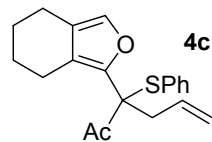

|            |                                    |
|------------|------------------------------------|
| 300.40 MHz | NON                                |
| 130.00 KHz | 1H                                 |
| 1150.0 Hz  |                                    |
| 5.6 us     |                                    |
| 97.2 us    |                                    |
| 0.2000 ms  |                                    |
| 1.0 sec    |                                    |
| 32768      |                                    |
| 32768      |                                    |
| 16         |                                    |
| 16         |                                    |
| 1          |                                    |
| 6013.2 Hz  |                                    |
| 3000 Hz    |                                    |
| 66.7 us    |                                    |
| 5.449 sec  |                                    |
| 1.551 sec  |                                    |
| 16.00      |                                    |
| 13         |                                    |
| 0.12 Hz    |                                    |
| 0.00       |                                    |
| T1         |                                    |
| 0.00       |                                    |
| T2         |                                    |
| 90.00      |                                    |
| T3         |                                    |
| 100.00     |                                    |
| T4         |                                    |
| EXMOD      | NON                                |
| EXPCM      | NON:Single,coupled:PWL_ACQTM_PD:1H |
| IRNUC      | 1H                                 |
| IFR        | 300.40 MHz                         |
| IRSET      | 130.00 KHz                         |
| IRFIN      | 1150.0 Hz                          |
| IRPRP      | 45 us                              |
| IRPN       | 511                                |
| DETL       | C:\WINN98\COMMON\_DEFAULT.ALS      |
| SE         | <del>PHS</del>                     |
| LSSET      | 25.50 KHz                          |
| IRFIN      | 63.0 Hz                            |
| LRLEV      | 180                                |
| LGAIN      | 18                                 |
| LRPHS      | 83                                 |
| LRSIG      | 563                                |
| CSFED      | 8 Hz                               |
| FILDF      |                                    |

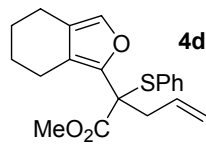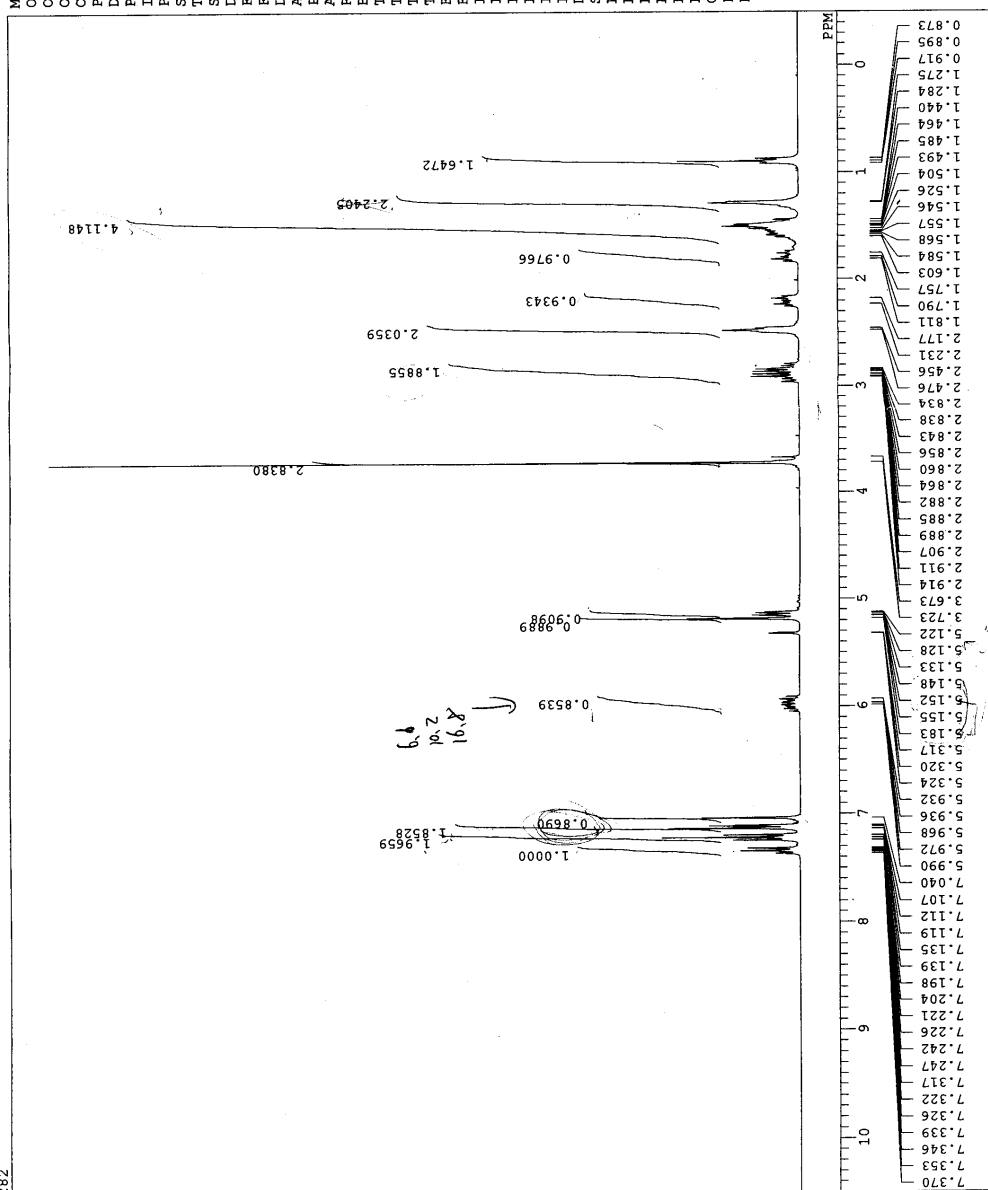

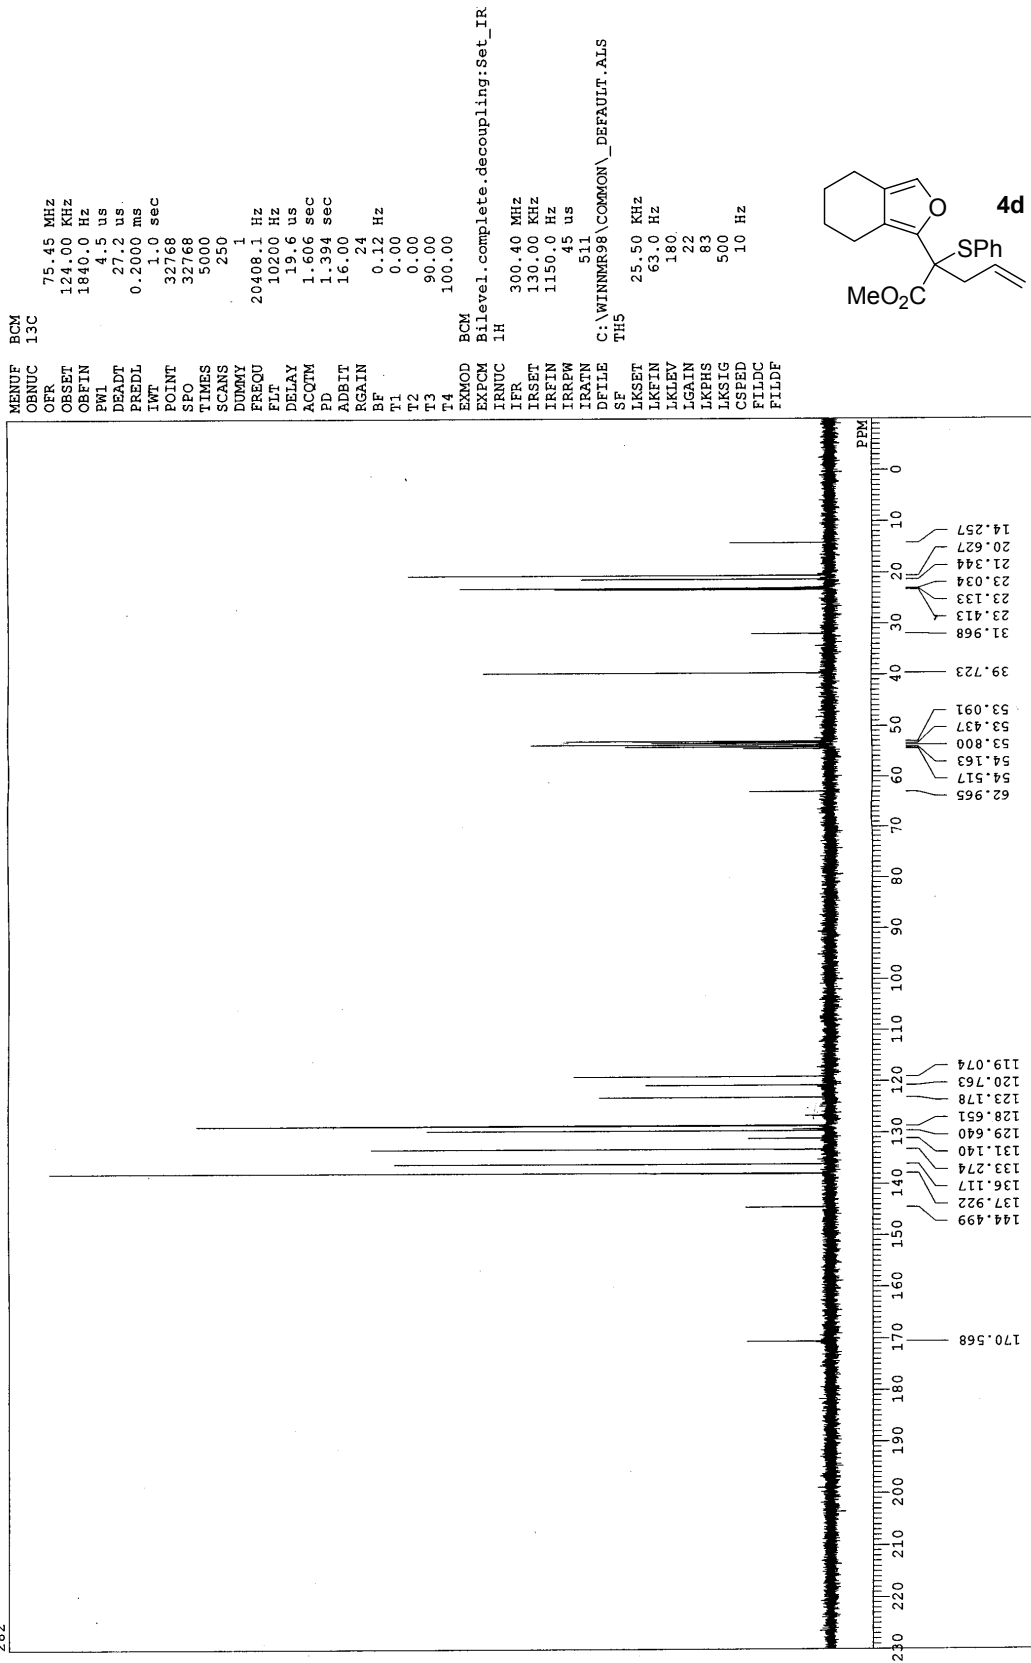

C:\WINNR98\COMMON\\_DEFAULT.ALS  
269

113

17.4 Hz

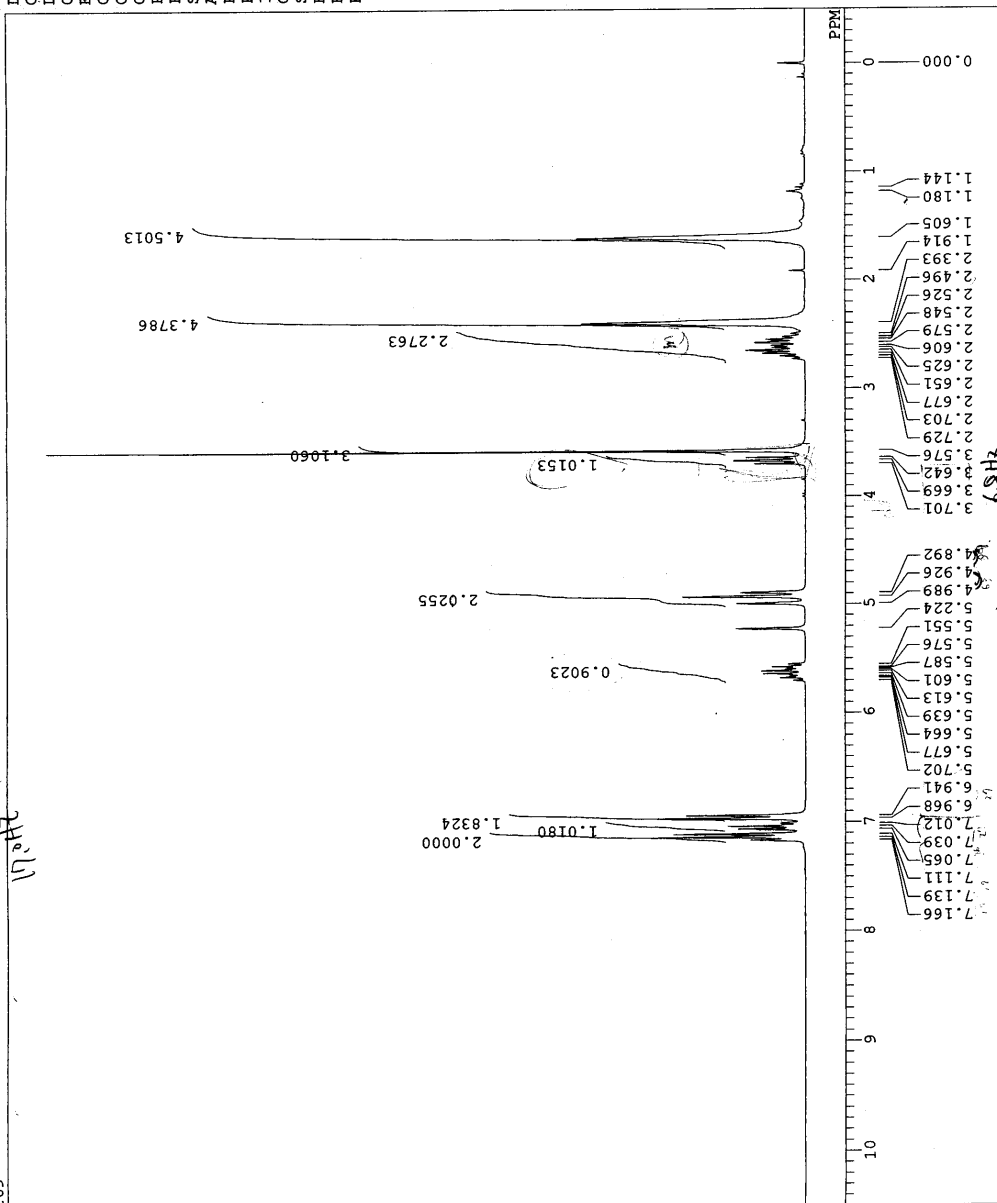

DFILE C:\WINNR98\COMMON\\_DEFAULT.ALS  
COMNT 269  
DATIM Tue Jan 21 22:10:31 2003  
OBNUC 1H  
EXMOD NON  
OBFRQ 270.05 MHz  
OBSET 112.00 KHz  
OBFIN 5800.0 Hz  
POINT 16384  
FREQU 5402.4 Hz  
SCANS 16  
ACQTM 3.033 sec  
PD 2.000 sec  
PWI 5.6 us  
IRNUC 1H  
CTEMP 25.3 C  
SLVNT CD2CL  
EXREF 0.00 ppm  
BF 1.20 Hz  
RGAIN 19

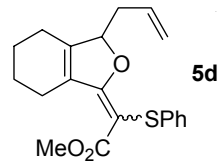

DFILE COMNT DATIM OBNUC EXMOD OBFRQ OBSET OBFIN POINT FREQU SCANS ACQTM PD PW1 IRNUC CTEMP SLVNT EXREF BF RGAIN

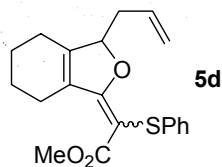

D:\258-terminal-MeS-Rh.als  
258 terminal-MeS-Rh

DETE D:\258-terminal-MeS-Rh.als  
COMPT 258 terminal-MeS-Rh  
DATE Sat Dec 14 22:38:01 2002  
OBNUC 1H  
EXMOD NON  
OBFRQ 300.40 MHz  
OBSET 130.00 KHz  
OBFIN 1150.0 Hz  
POINT 32768  
FREQ 6013.2 Hz  
SCANS 16  
ACQTM 5.449 sec  
PD 1.551 sec  
FWD 5.7 us  
IRNUC 1H  
CTEMP 23.1 c  
SOLVT CD2CL2  
EXREF 5.32 ppm  
BF 0.12 Hz  
RGAIN 15

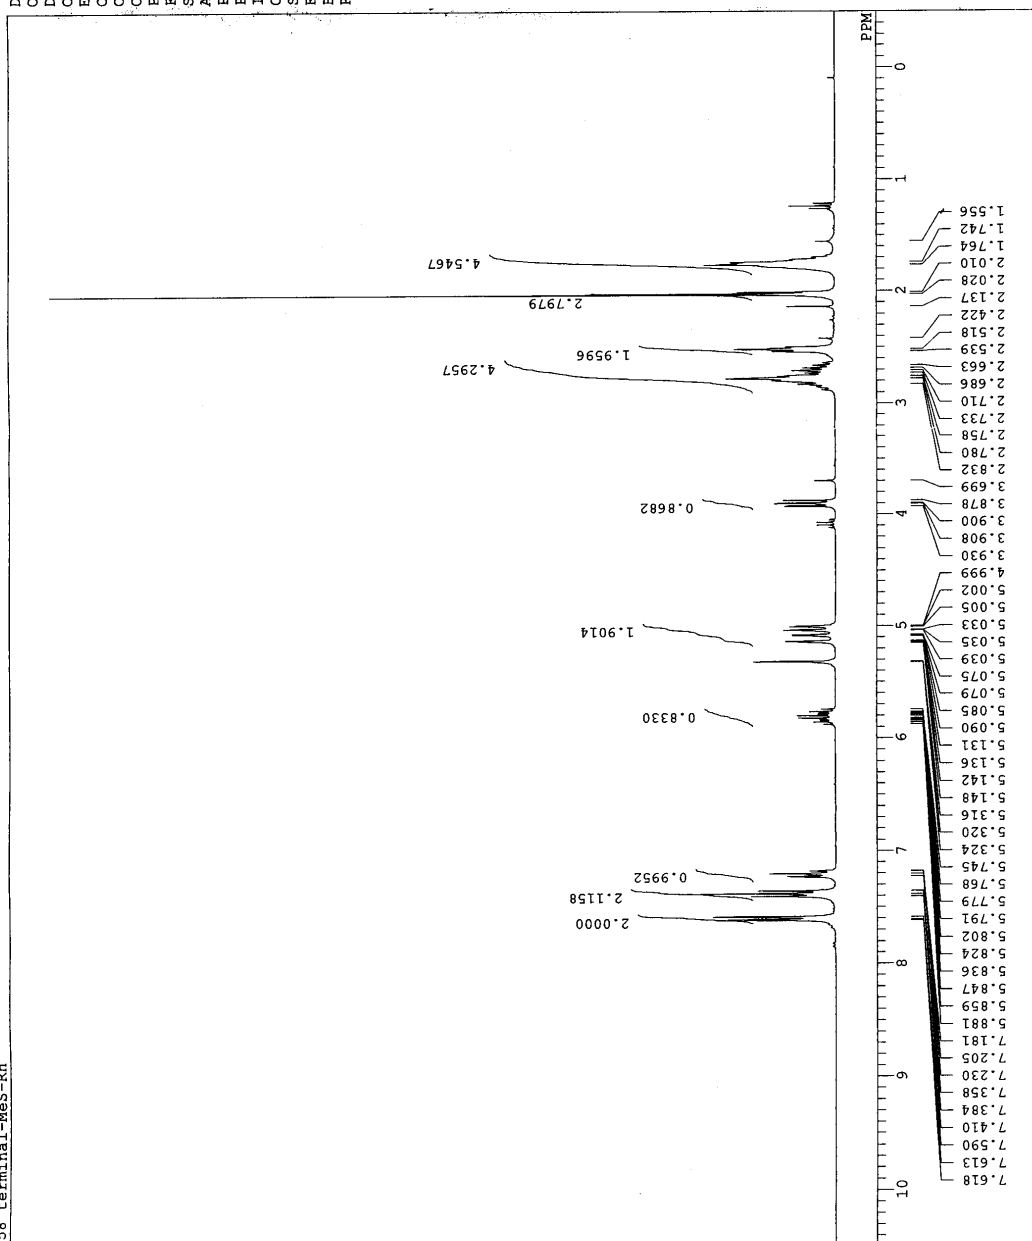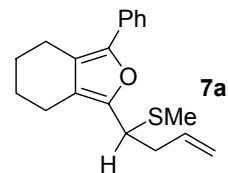

C:\WINNMR98\COMMON\DEFAULT.ALS  
258 terminal-MeS-Rh

C:\WINNMR98\COMMON\DEFAULT.ALS  
COMNT 258 terminal-MeS-Rh  
DATIM Sat Dec 14 22:55:31 2002

ORNUC 13C  
EXMOD BCM  
OBFRQ 75.45 MHz  
OBSET 124.00 KHz  
OBFIN 1840.0 Hz  
POINT 32768  
FREQU 204081.1 Hz  
SCANS 200  
ACQTM 1.606 sec  
PD 1.394 sec  
PWL 4.4 us  
IRNUC 1H  
CTEMP 23.7 C  
SLVNT CD2CL2  
EXREF 53.80 ppm  
BF 0.12 Hz  
RGAIN 24

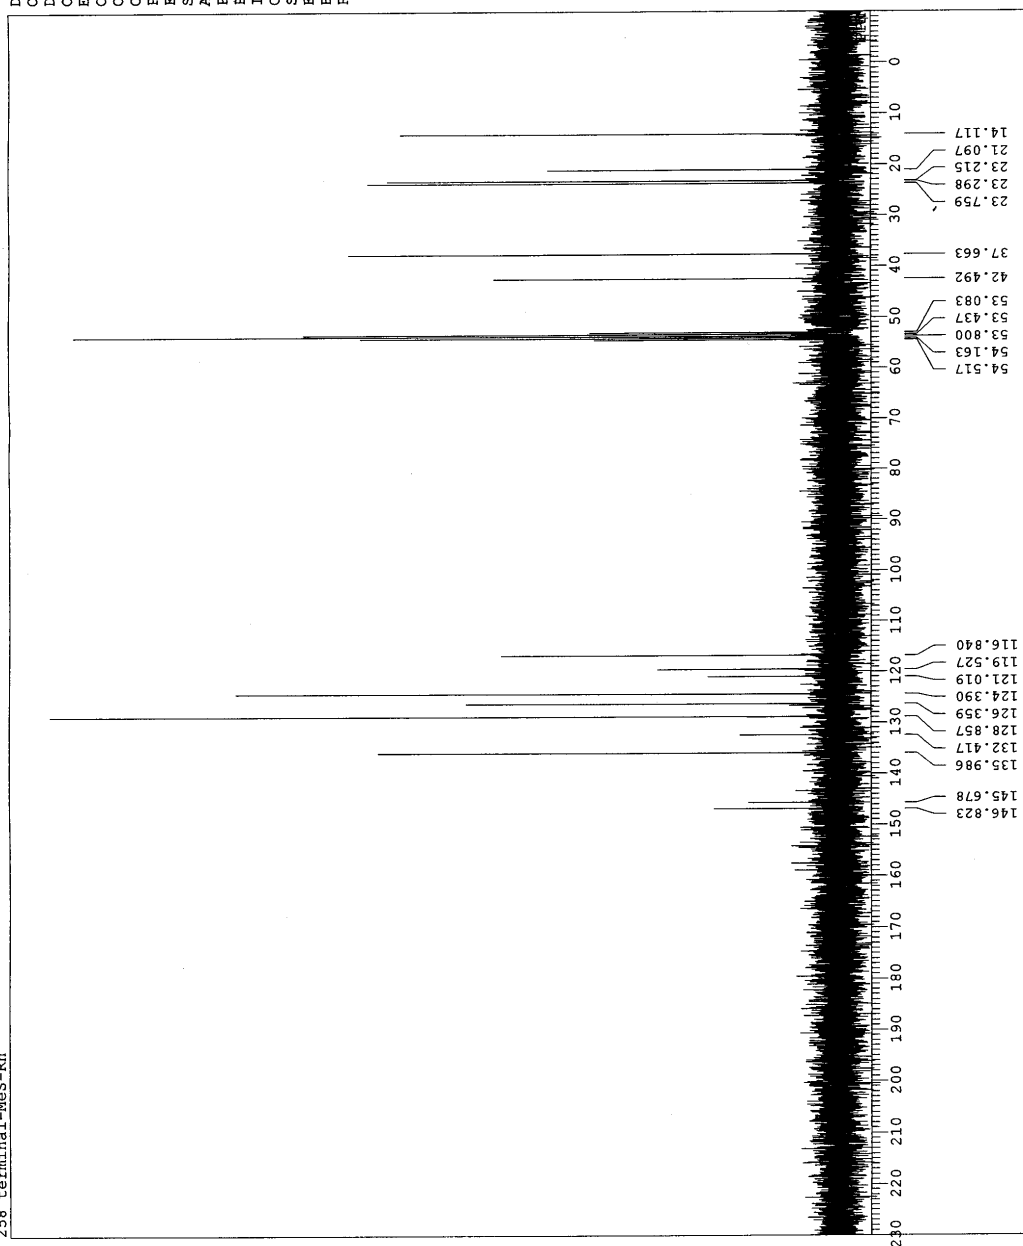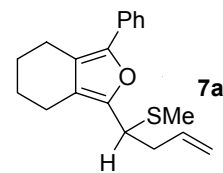

C:\WINNMR98\COMMON\\_DEFAULT.ALS  
250

DFILE 250  
COMNT Tue Nov 19 18:35:49 2002  
OBNUC 1H  
EXMOD NON  
OBFRQ 399.65 MHz  
OBSET 124.00 KHz  
OBFIN 10500.0 Hz  
POINT 16384  
FREQU 8000.0 Hz  
SCANS 8  
ACQTM 2.048 sec  
PD 2.952 sec  
PWL 8.5 us  
IRNUC 1H  
CTEMP 25.8 c  
SIVNT CDCL3  
EXREF 0.00 ppm  
BF 0.10 Hz  
RGAIN 16

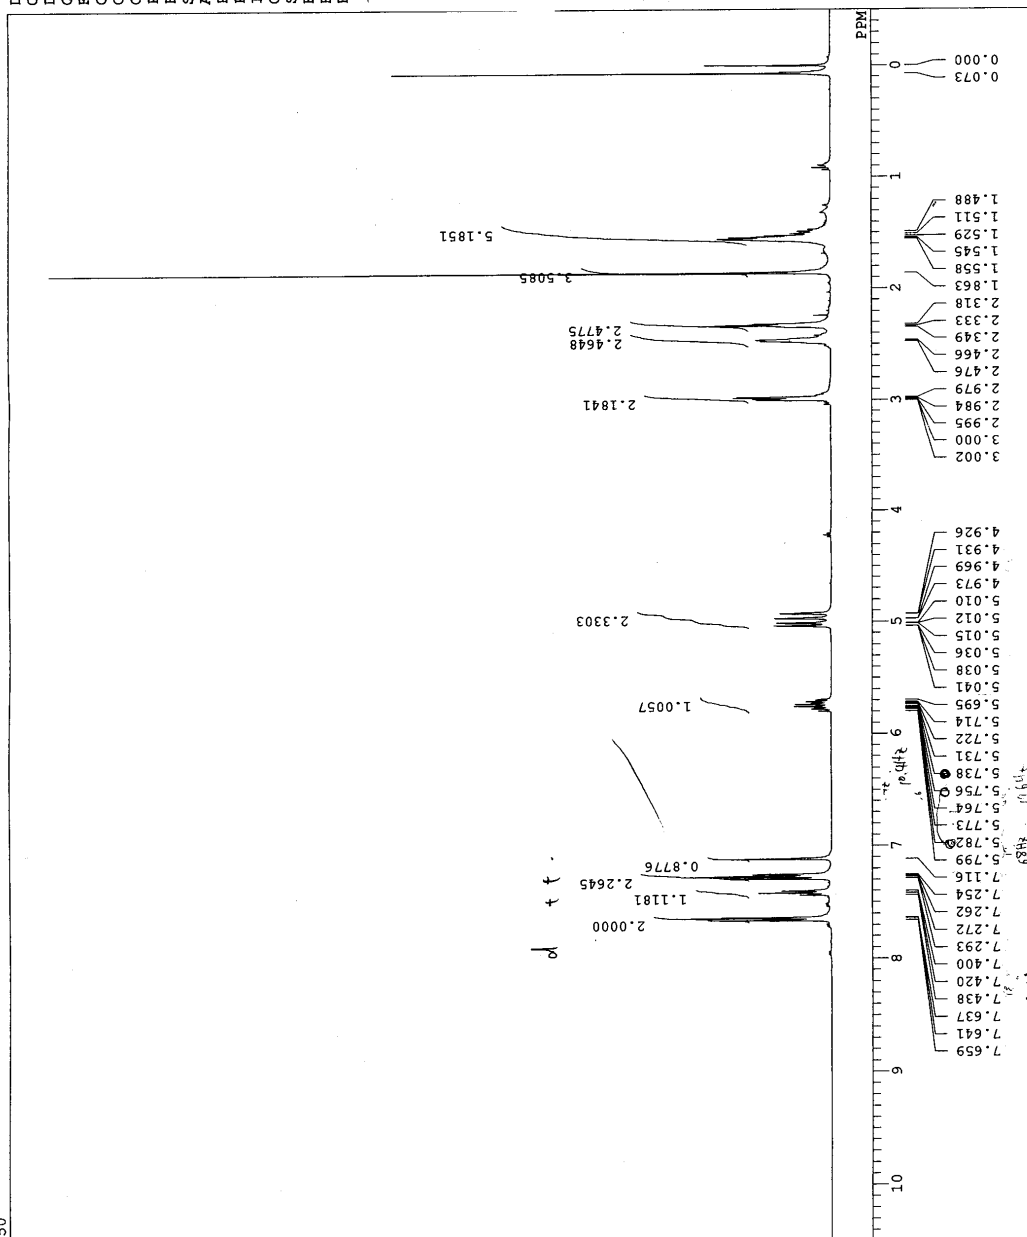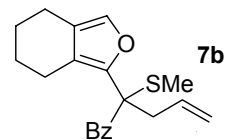



C:\WINNR98\COMMON\_DEFAULT.ALS  
250 bz-allylmethylS-Rh-reflux

DFILE C:\WINNR98\COMMON\_DEFAULT.ALS  
COMNT 250 bz-allylmethylS-Rh-reflux  
DATIM Mon Nov 18 23:01:10 2002

OBNUC 13C  
EXMOD BCM  
OBFREQ 67.80 MHz  
OBSET 135.00 KHz  
OBFIN 5200.0 Hz  
POINT 32768  
FREQU 18315.0 Hz  
SCANS 251  
ACQTM 1.789 sec  
PD 1.211 sec  
PW1 4.2 us  
IRNUC 1H  
CTEMP 24.4 C  
SLVNT CD2CL  
EXREF 53.80 ppm  
BF 0.10 Hz  
RGAIN 28

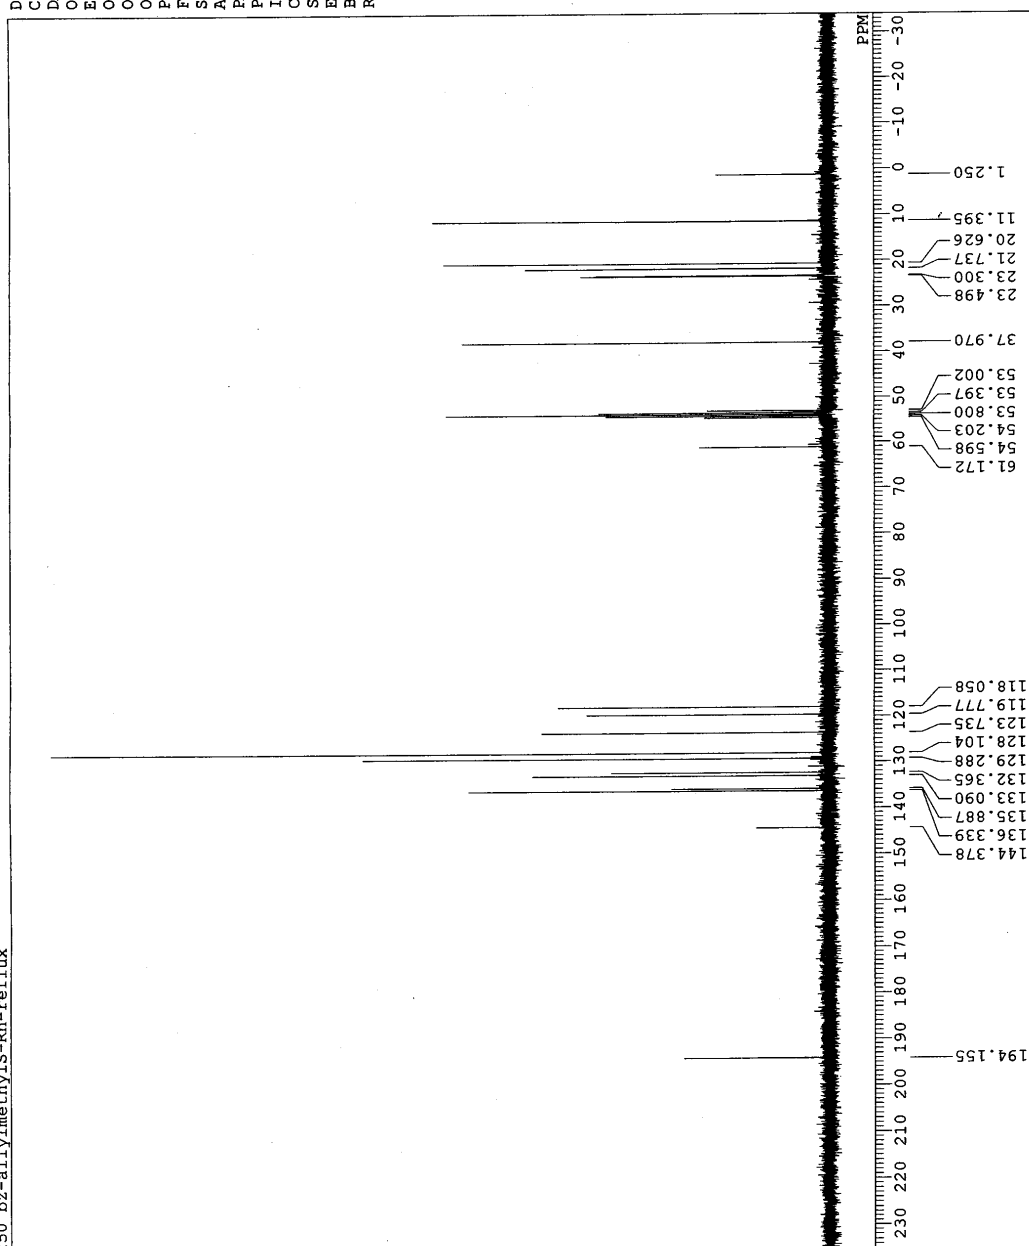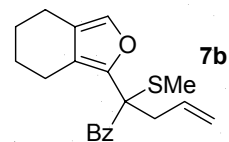

DFILE C:\WINMR98\COMMON\DEFAULT.AL  
 CONNT Wed Jan 15 00:32:19 2003  
 DATIM 1H  
 EXMOD NON  
 OBNUC 270.05 MHz  
 OBFRQ 112.00 KHz  
 OBSET 5800.0 Hz  
 OBFIN 16384  
 POINT 5402.4 Hz  
 FREQU 16  
 SCANS 3.033 sec  
 ACQTM 2.000 sec  
 PD 5.6 us  
 PW1 25.4 C  
 IRNUC 1H  
 CTMP CD2CL  
 SLVNT 0.07 ppm  
 EXREF 0.12 Hz  
 BF 16  
 RGAIN

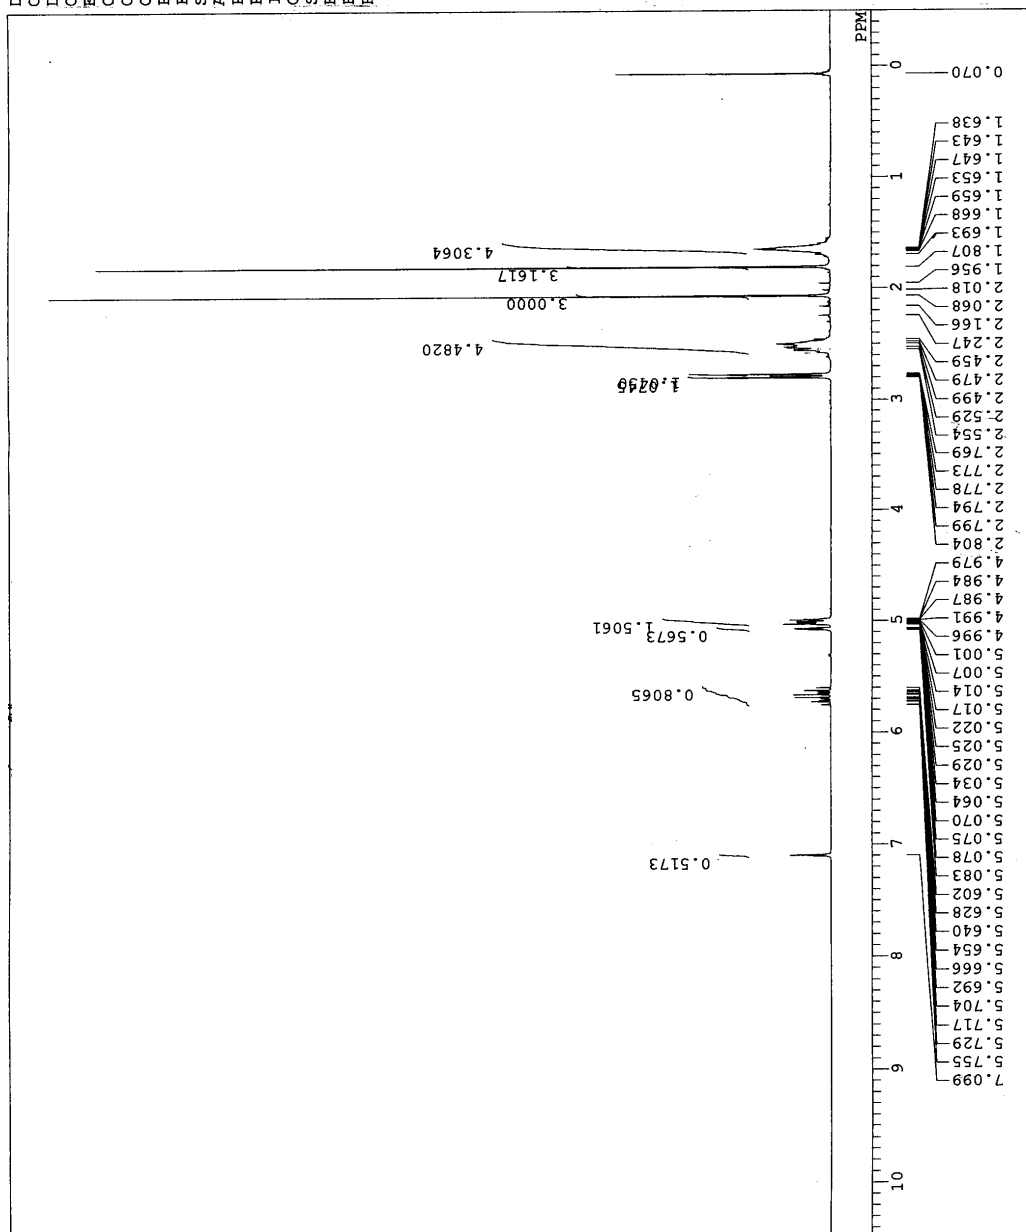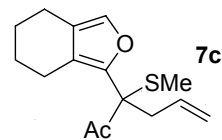

C:\WINMR98\COMMON\\_DEFAULT.ALS

DFILE C:\WINMR98\COMMON\\_DEFAULT.ALS

COMNT  
DATIM Wed Jan 15 00:54:45 2003  
OBNUC 13C  
EXMOD BCM  
OBFFQ 67.80 MHz  
OBSET 135.00 KHz  
OBFIN 5200.0 Hz  
POINT 32768  
FREQU 18315.0 Hz  
SCANS 307  
ACQTM 1.789 sec  
PD 1.211 sec  
PW1 4.2 us  
IRNUC 1H  
CTEMP 26.1 c  
SLVNT CD2CL  
EXREF 53.80 ppm  
BF 0.12 Hz  
RGAIN 28

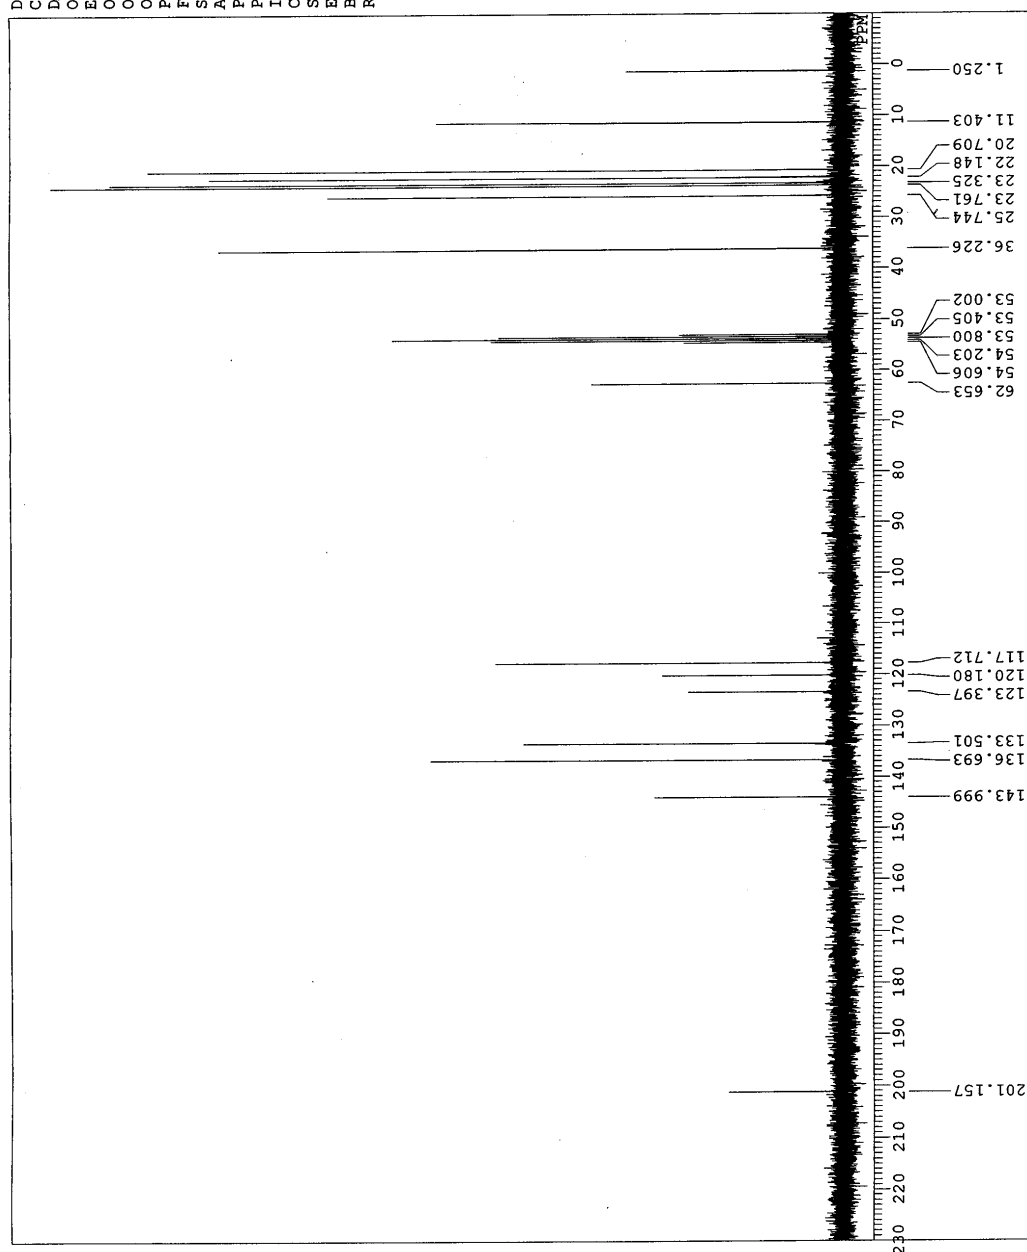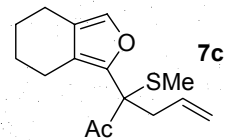

C:\WINNR98\COMMON\DEFAULT.ALS  
274-pure

C:\WINNR98\COMMON\DEFAULT.ALS

DEFILE 274-pure  
COMNT 274-pure  
DATIM Mon Jan 27 23:29:41 2003  
ORNUC 1H  
EXMOD NON  
OBFREQ 399.65 MHz  
OBSEI 124.00 KHz  
OBFIN 10500.0 Hz  
POINT 16384  
FREQU 8000.0 Hz  
SCANS 16  
ACQTM 2.048 sec  
PD 2.952 sec  
PWL 8.5 us  
IRNUC 1H  
CTEMP 25.4 C  
SIVNT CD2CL  
EXREF 0.00 ppm  
BF 1.20 Hz  
RGAIN 13

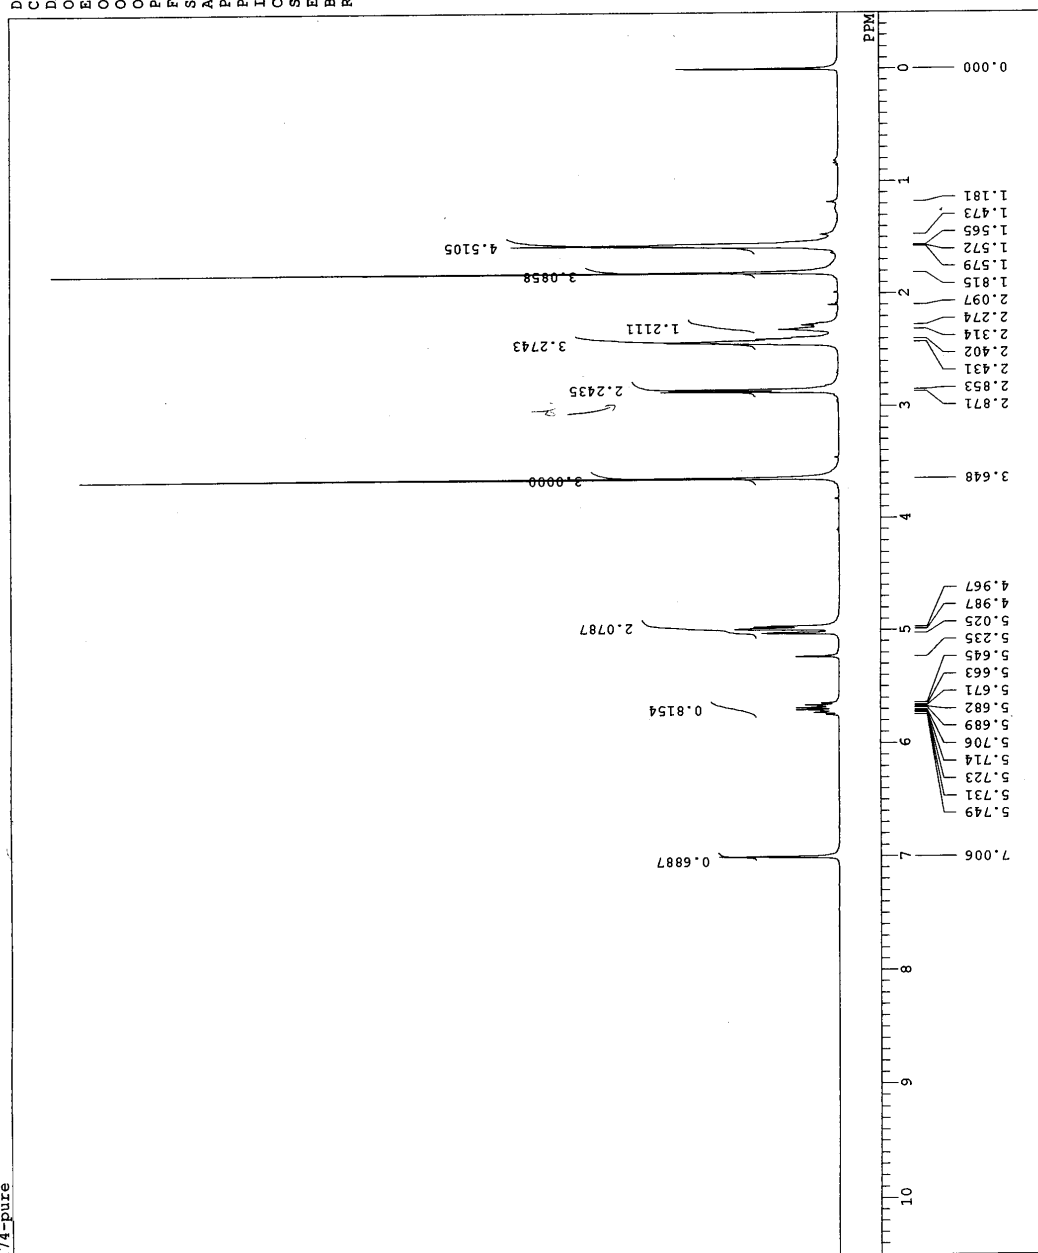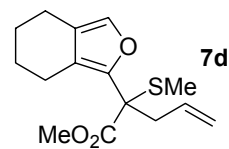

C:\WINNR98\COMMON\\_DEFAULT.ALS  
274-pure

DFILE C:\WINNR98\COMMON\\_DEFAULT.ALS  
COMNT 274-pure  
DATIM Mon Jan 27 23:45:52 2003  
OBNUC 13C  
EXMOD BCM  
OBFRQ 100.40 MHz  
OBSET 125.00 KHz  
OBFIN 10500.0 Hz  
POINT 32768  
FREQU 27173.9 Hz  
SCANS 200  
ACQTM 1.206 sec  
PD 1.794 sec  
PWL 5.0 us  
IRNUC 1H  
CTEMP 26.2 c  
SIVNT CD2CL  
EXREF 53.80 ppm  
BF 1.20 Hz  
RGAIN 32

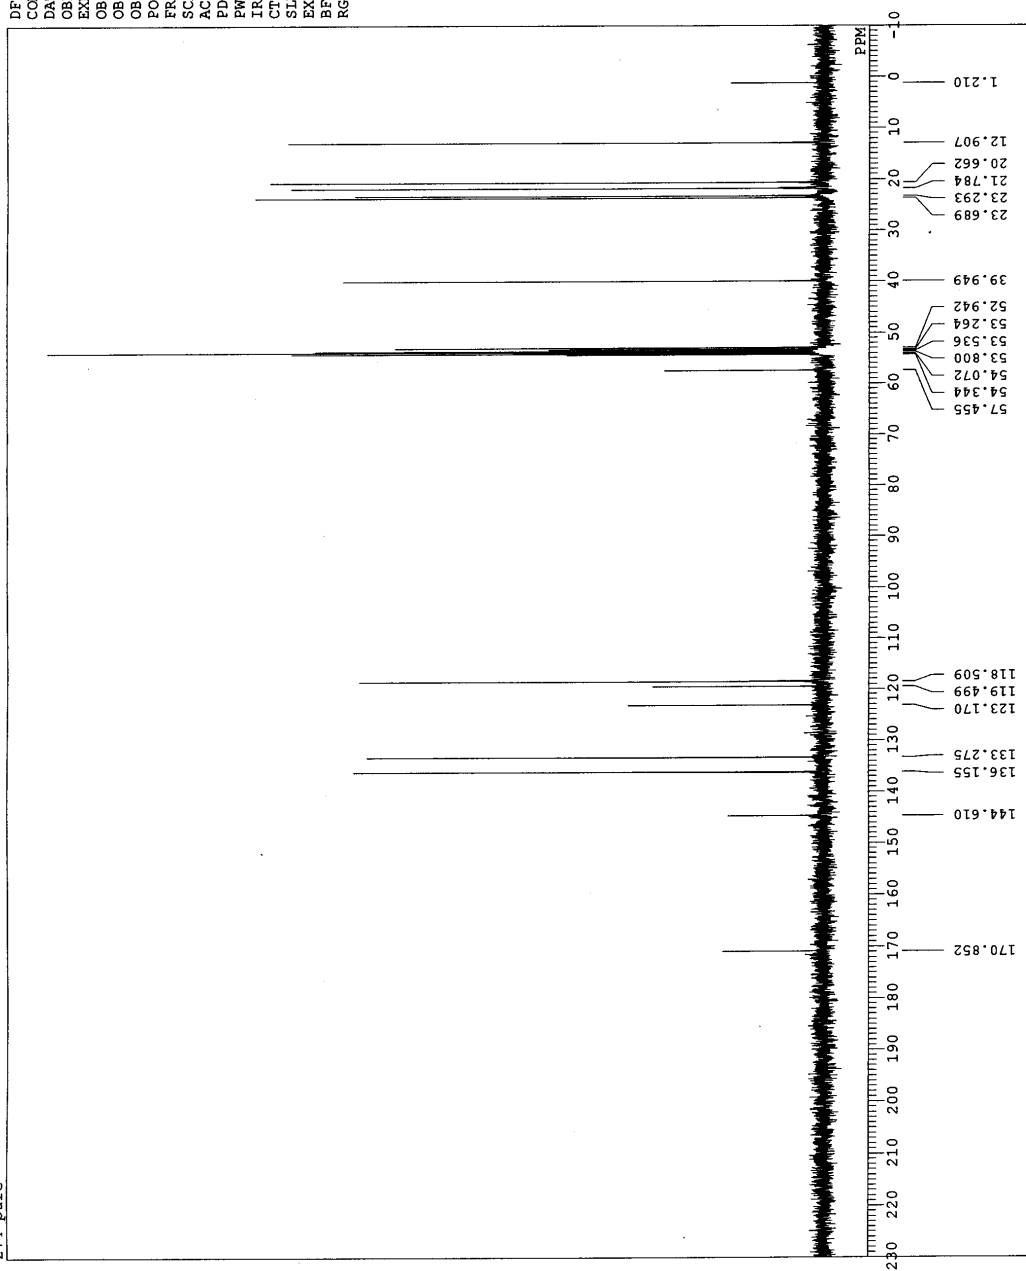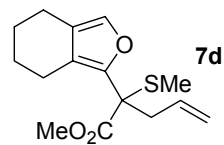

|       |       |            |  |
|-------|-------|------------|--|
| DF    | COMNT | 245-mix    |  |
|       | CONUC | 1H         |  |
| OFR   |       | 399.65 MHz |  |
| OSSET |       | 124.00 KHz |  |
| OSFIN |       | 10500.0 Hz |  |
| PFW1  |       | 8.5 us     |  |
| PM2   |       | 10.0 us    |  |
| PM3   |       | 10.0 us    |  |
| PI1   |       | 1.000 ms   |  |
| PI2   |       | 1.000 ms   |  |
| PI3   |       | 1.00 ms    |  |
| LOOP1 |       | 1          |  |
| POINT |       | 16384      |  |
| SFO   |       | 16384      |  |
| SCANS |       | 16         |  |
| DDMMY |       | 1          |  |
| FREQU |       | 8000.0 Hz  |  |
| AQCTM |       | 2.048 sec  |  |
| PD    |       | 2.952 sec  |  |
|       | RGAIN | 13         |  |
| BF    |       | 0.25 Hz    |  |
| EXMOD | NON   |            |  |
| IRNUC | 1H    |            |  |
| IFR   |       | 399.65 MHz |  |
| IRSET |       | 124.00 KHz |  |
| IRFZN |       | 10500.0 Hz |  |
| IRRPW |       | 50 us      |  |
| IRATN |       | 511        |  |
| CSFED |       | 16 Hz      |  |
| CTEMP |       | 26.9 C     |  |
| XT    |       |            |  |
| XS    |       |            |  |

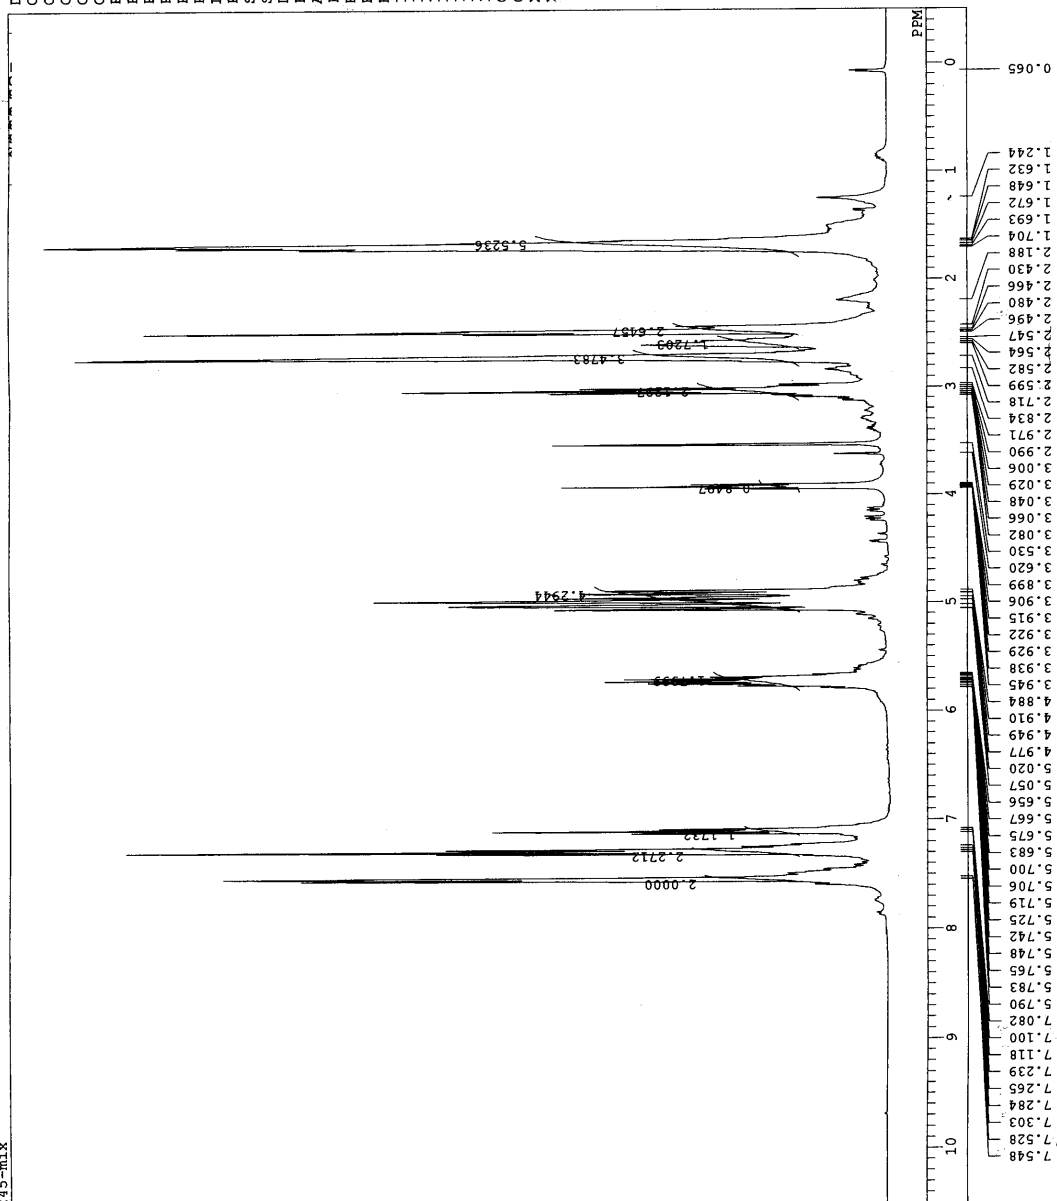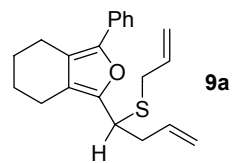

C:\WINMR98\COMMON\\_DEFAULT.ALS  
245-mix

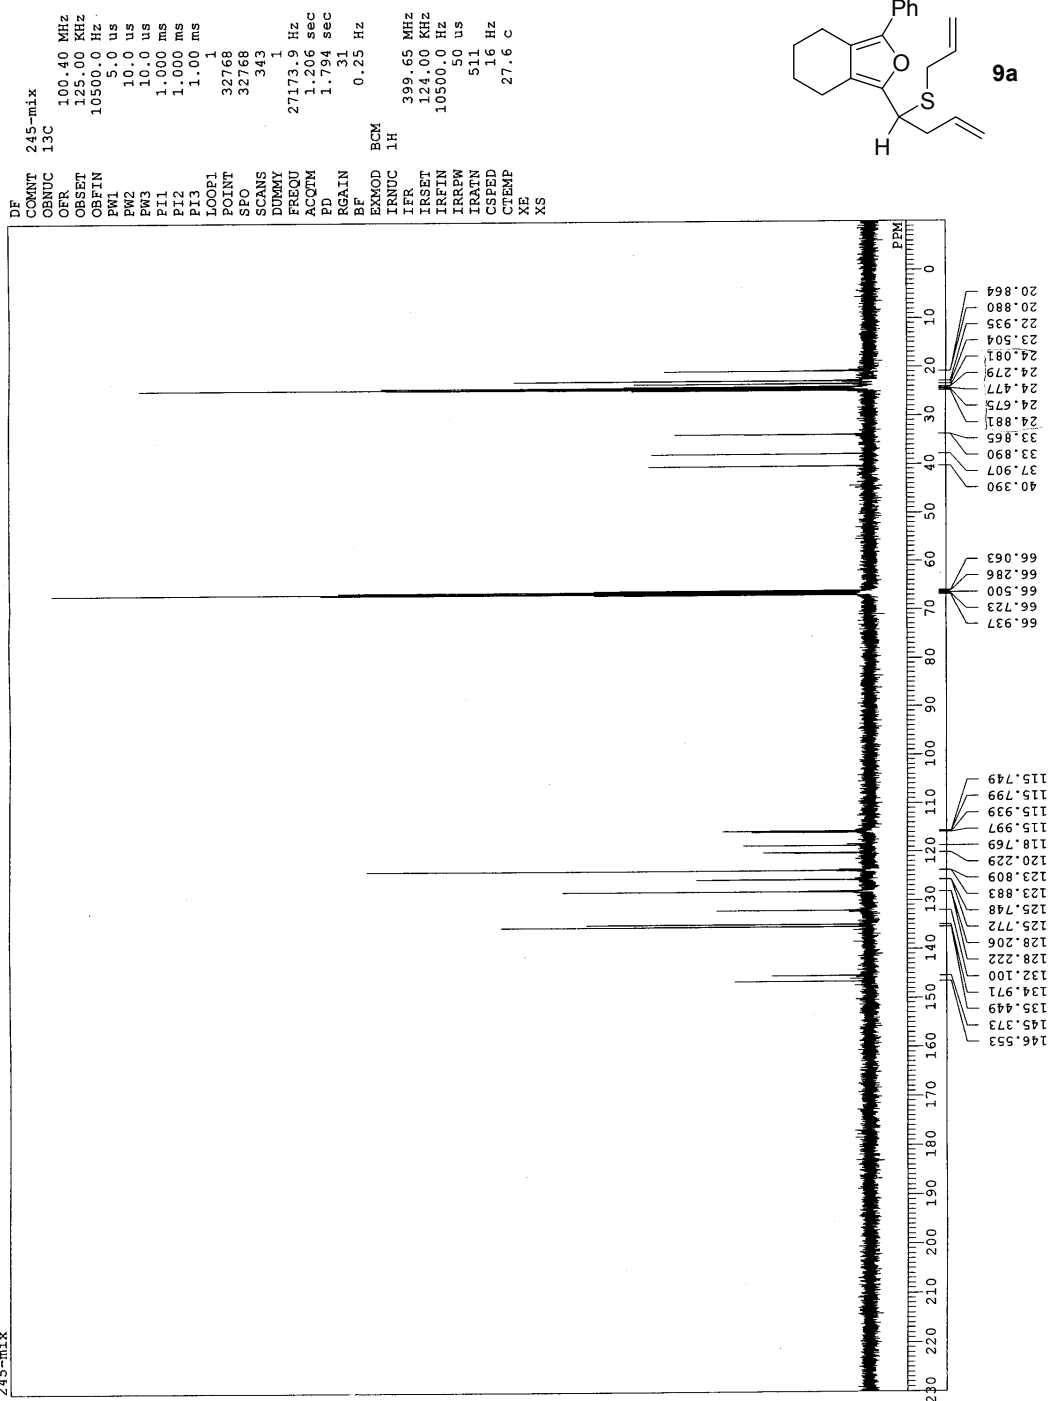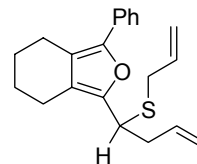

9a

```

DFILE C:\WINMR98\COMMON\DEFAULT.ALS
COMMT 246-1st C6O2  $\Phi$   $\frac{13}{14}$ 
DATIM Thu Nov 07 16:45:14 2002

```

| OSNOC   | IN | NON    | 300.40 MHz |
|---------|----|--------|------------|
| OSBRQ   |    |        | 130.00 KHz |
| OSBET   |    |        | 1150.0 Hz  |
| OSOFIN  |    |        | 32768      |
| POPOINT |    |        | 6013.2 Hz  |
| SCANS   |    | 16     |            |
| ACQTM   |    |        | 5.449 sec  |
| PD      |    |        | 1.551 sec  |
| PR1     | 1H |        | 5.7 us     |
| IRNUC   |    |        | 22.6 c     |
| CTEMP   |    | CD2CL2 |            |
| SIVNT   |    |        | 5.32 ppm   |
| EXREF   |    |        | 0.10 Hz    |
| BF      |    |        |            |
| RGAIN   |    | 13     |            |

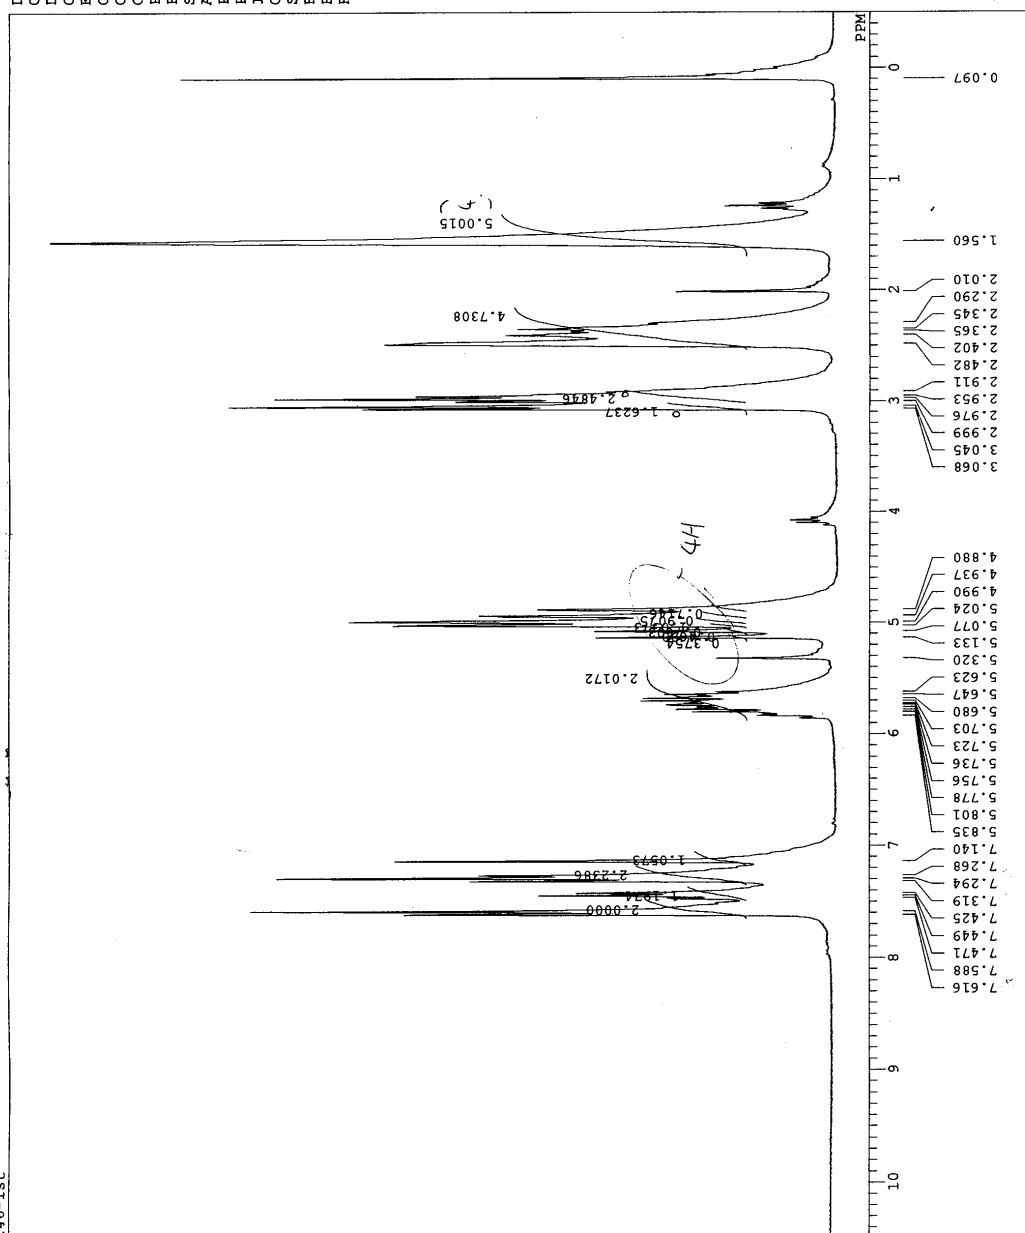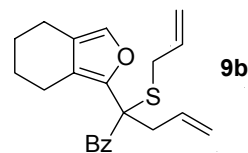



C:\WINNR98\COMMON\\_DEFAULT.ALS  
246-1st

DEFILE C:\WINNR98\COMMON\\_DEFAULT.ALS  
 COMNT 246-1st  
 DATIM Thu Nov 07 17:26:40 2002  
 OBNUC 13C  
 EXMOD BCM  
 OBFRQ 75.45 MHz  
 OBSET 124.00 KHz  
 OBFIN 1840.0 Hz  
 POINT 32768  
 FREQ 20408.1 Hz  
 SCANS 104  
 ACQTM 1.606 sec  
 PD 1.394 sec  
 PW 4.4 us  
 IRNUC 1H  
 CTEMP 23.0 C  
 CD2CL2  
 SLVNT  
 EXREF 53.80 ppm  
 BF 0.10 Hz  
 RGAIN 24

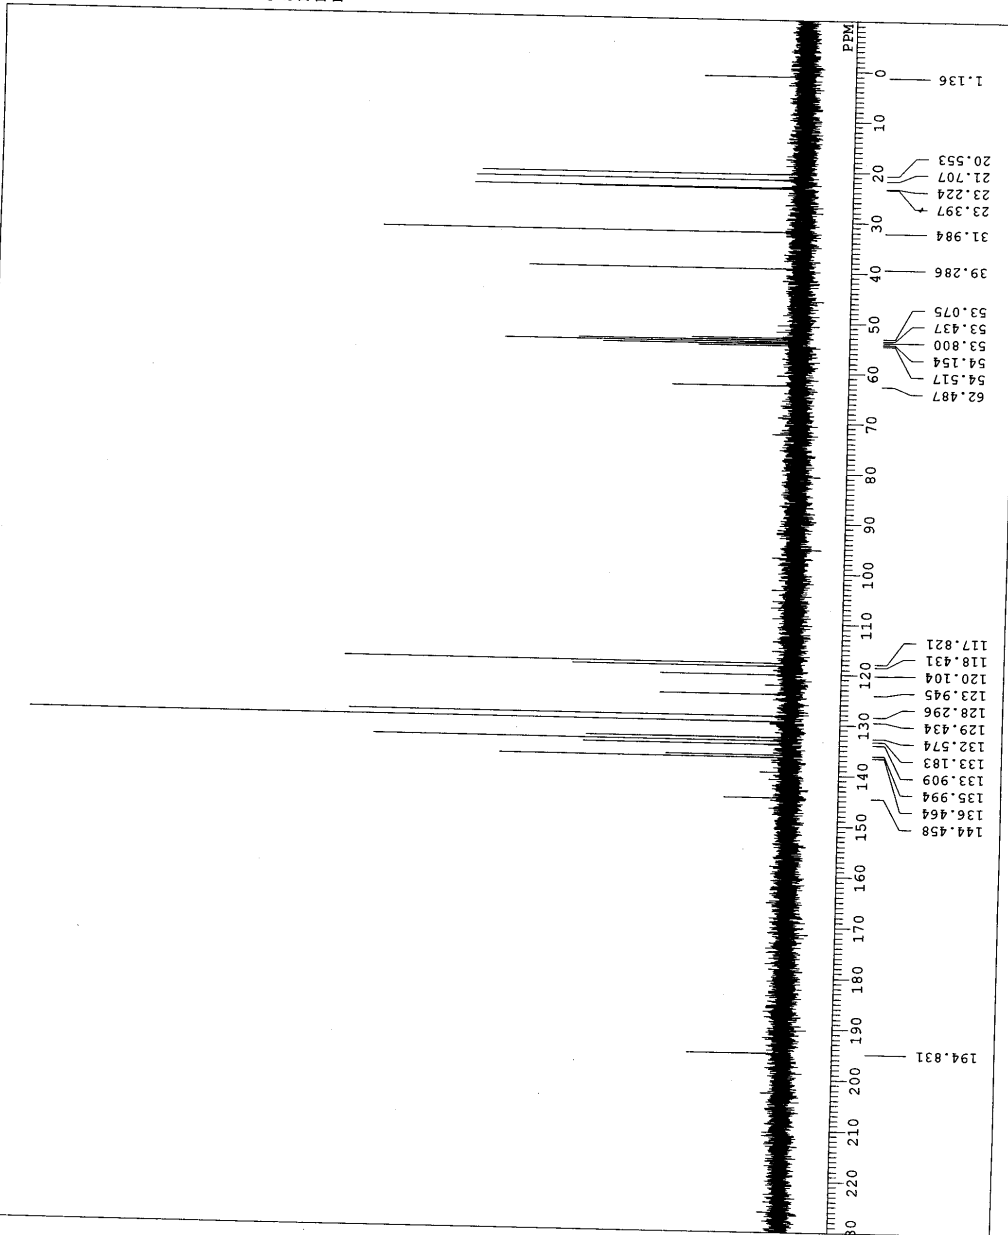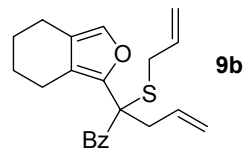

```

C:\WINMR98\COMMON\DEFAULT.ALS
261 Bz-diallyls-Rh-DCE DA up
DATIM Wed Dec 18 16:01:26 2002

```

DFILE  
 COMNT  
 DATIM  
 OBNUC  
 EXMOD  
 OBFRQ  
 OBSET  
 OBFIN  
 POINT  
 FREQU  
 SSCANS  
 ACQTM  
 PD  
 PW1  
 IRNUC  
 CTEMP  
 SLVNT  
 EXREF  
 BF  
 RGAIN

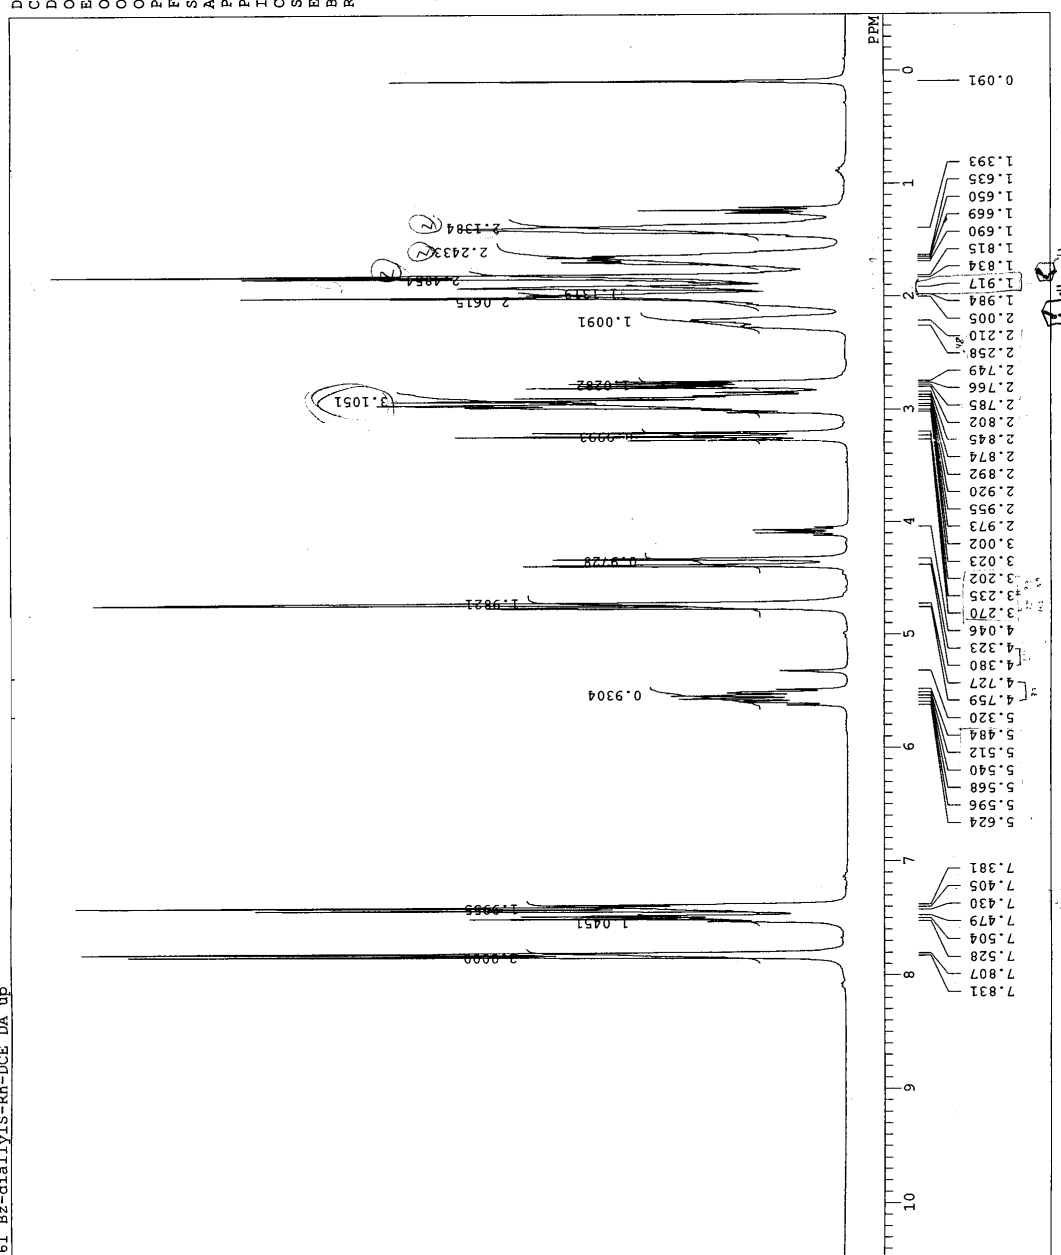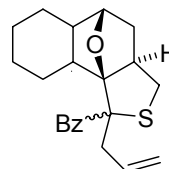

**10b-major**

C:\WINNR98\COMMON\\_DEFAULT.ALS  
246-2nd

DFILE C:\WINNR98\COMMON\\_DEFAULT.ALS  
COMMT 246-2nd  
DATIM Thu Nov 07 17:16:06 2002  
GENUC 13C  
EXMOD BCM  
OBFRQ 75.45 MHz  
OBSET 124.00 KHz  
OBFIN 1840.0 Hz  
POINT 32768  
FREQ 20408.1 Hz  
SCANS 231  
ACQTM 1.606 sec  
PD 1.394 sec  
PW 4.4 us  
IRNUC 1H  
CTEMP 22.9 C  
SIVNT CD2CL2  
EXREF 53.80 ppm  
BF 0.10 Hz  
RGAIN 24

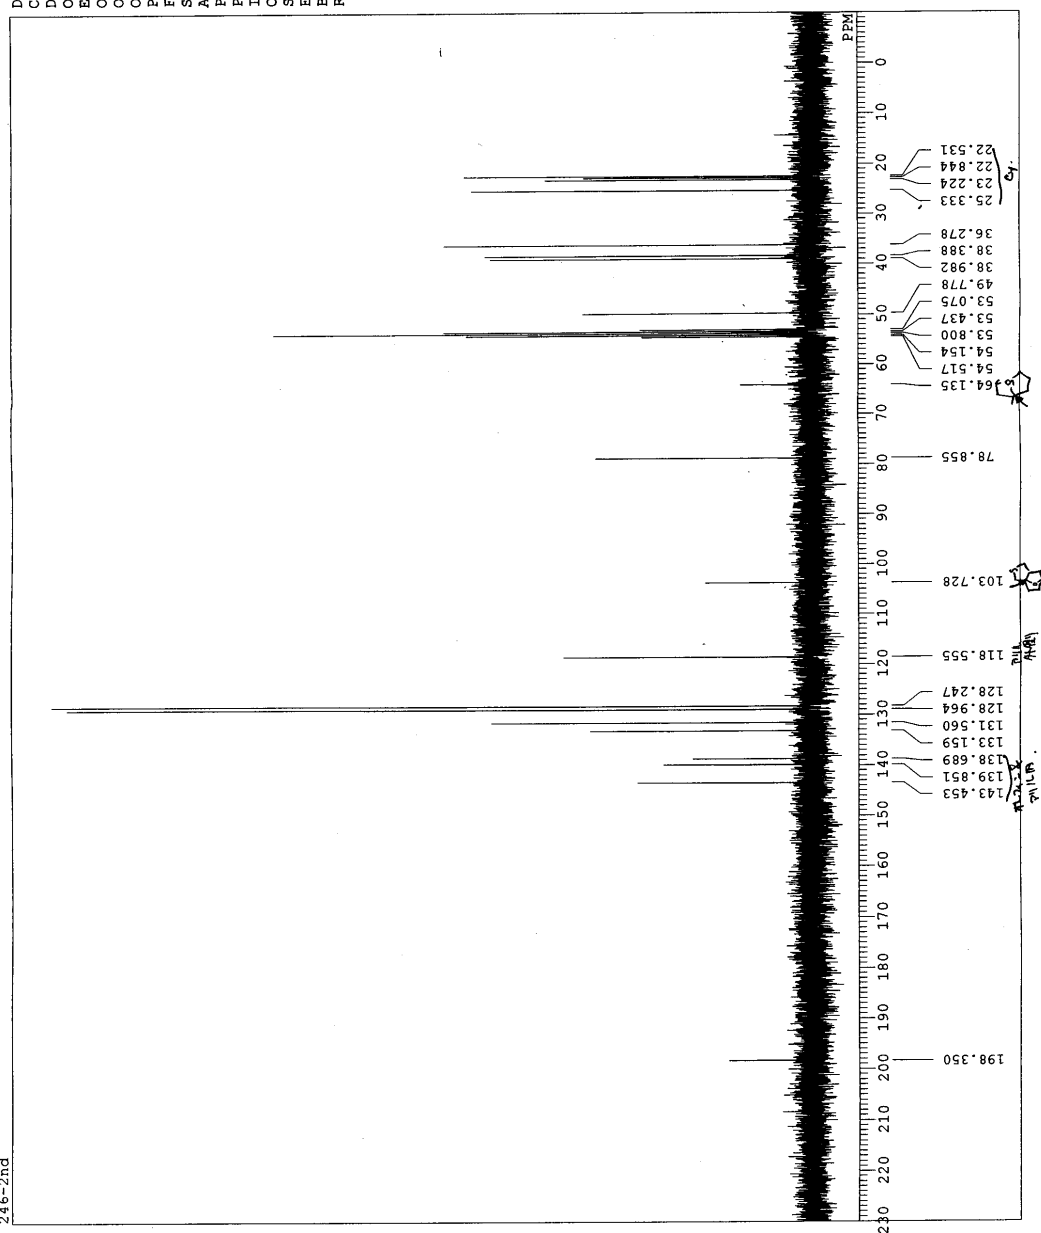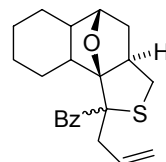

C:\WINNR98\COMMON\DEFAULT.ALS  
261 Bz-diallyls-Rh-DCE DA under

C:\WINNR98\COMMON\DEFAULT.ALS  
261 Bz-diallyls-Rh-DCE DA under  
DATIM Wed Dec 18 16:11:08 2002

OBNUC 1H  
EXMOD NON  
OBFRQ 300.40 MHz  
OBSET 130.00 KHz  
OBFIN 1150.0 Hz  
POINT 32768  
FREQU 6013.2 Hz  
SCANS 16  
ACQTM 5.449 sec  
PD 1.551 sec  
PW1 5.7 us  
IRNUC 1H  
CTEMP 22.3 C  
SOLNT CD2CL2  
EXREF 5.32 ppm  
BF 1.20 Hz  
RGAIN 17

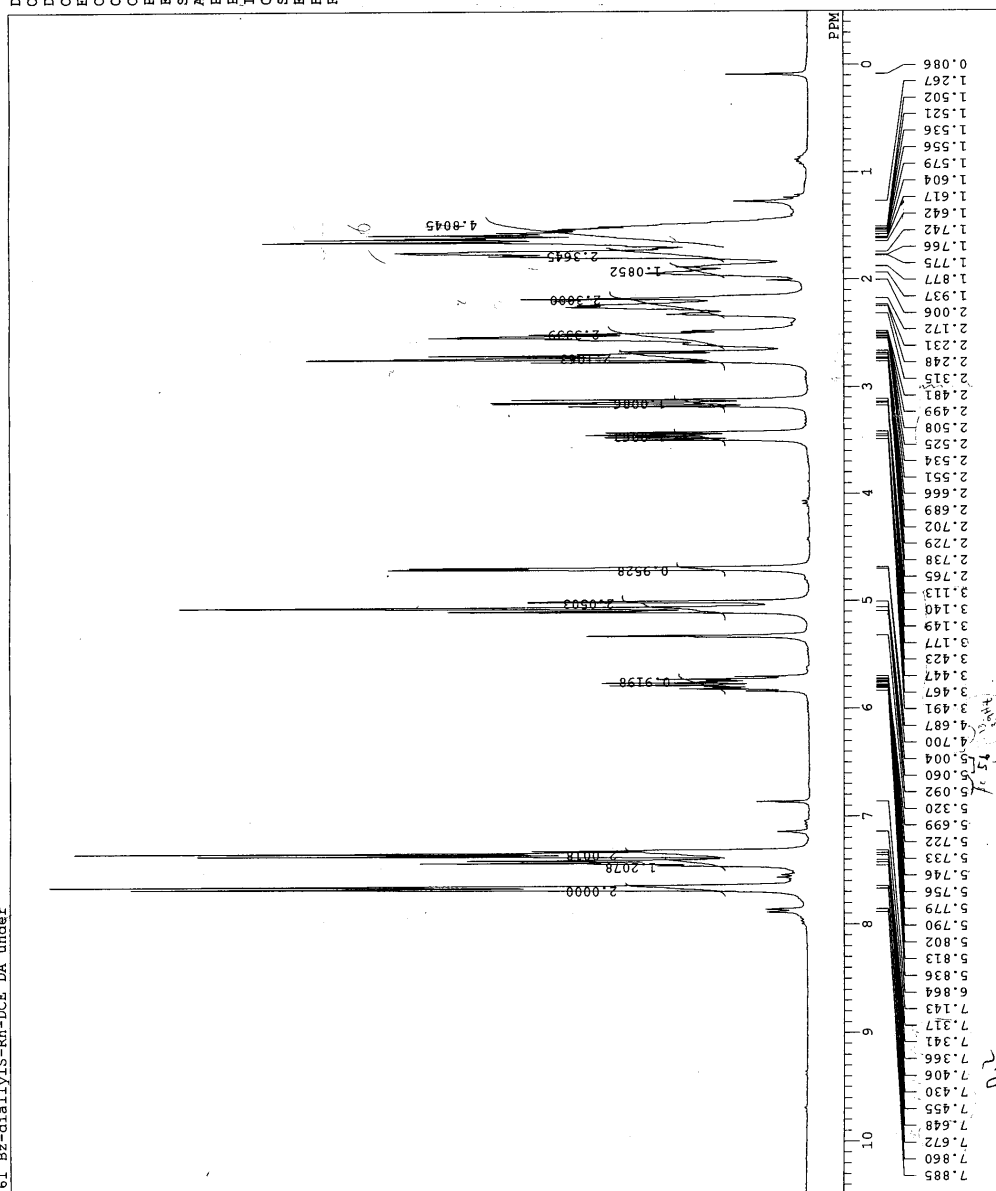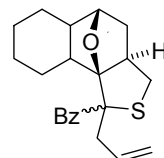

10b-minor

C:\WINNR98\COMMON\DEFAULT.ALS  
261 Bz-diallyls-Rh-DCE DA under

DFILE C:\WINNR98\COMMON\DEFAULT.ALS  
COMNT 261 Bz-diallyls-Rh-DCE DA under  
DATIM Wed Dec 18 16:30:43 2002

OBNUC 13C  
EXMOD BCM  
OBFRQ 75.45 MHz  
OBSET 124.00 KHz  
OBFIN 1840.0 Hz  
POINT 32768  
FREQ 20408.1 Hz  
SCANS 300  
ACQTM 1.606 sec  
PD 1.394 sec  
F1 4.4 us  
IRNUC 1H  
CTEMP 23.3 C  
SIVNT CD2CL2  
EXREF 53.80 ppm  
BF 1.20 Hz  
RGAIN 24

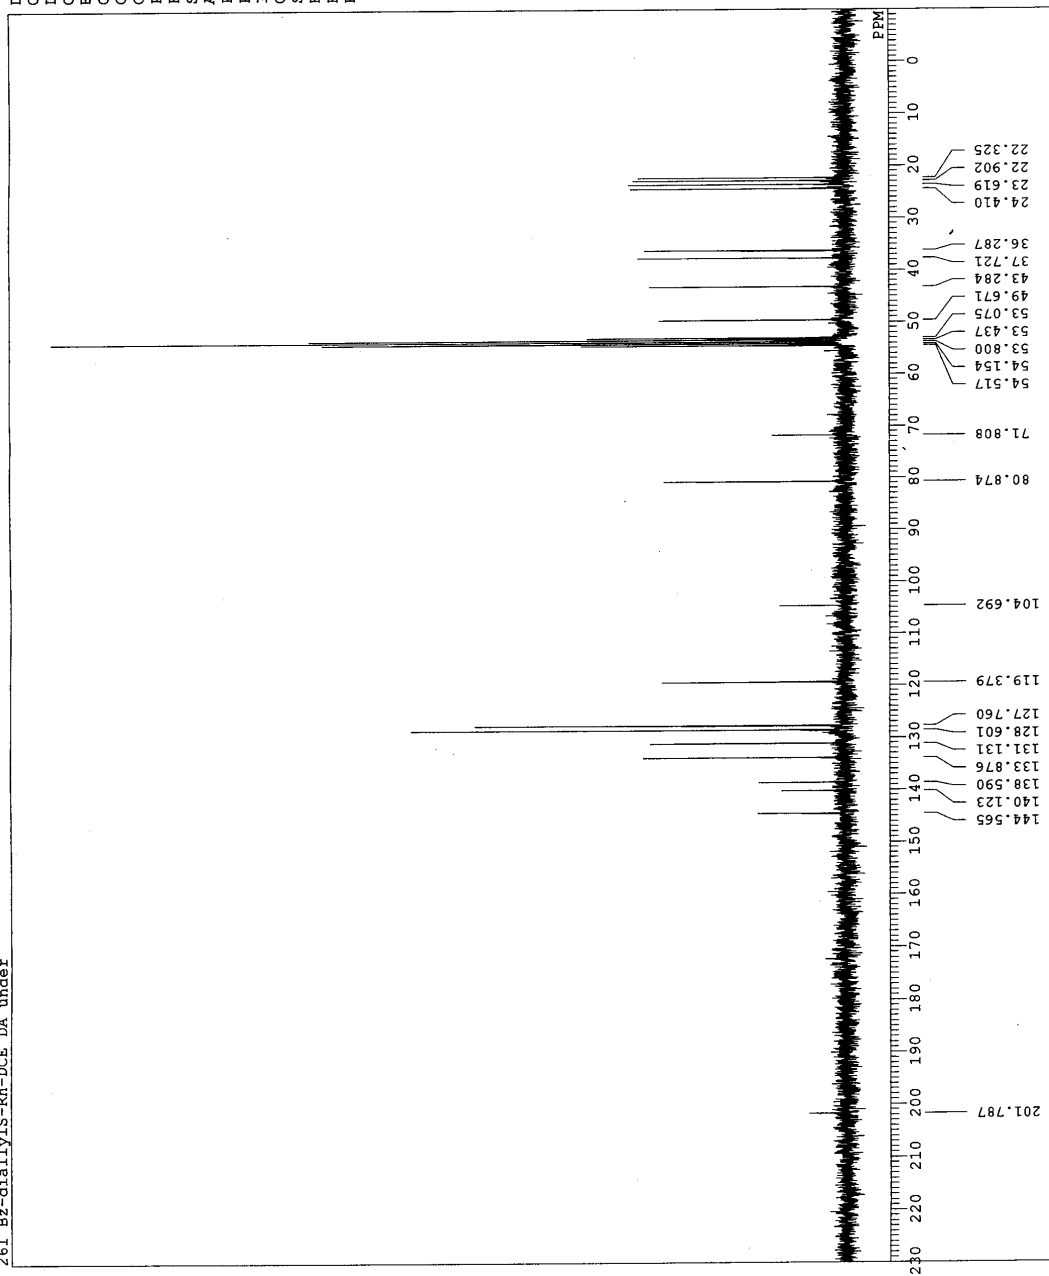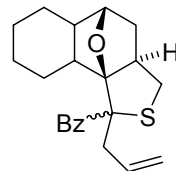

10b-minor

C:\WINMR98\COMMON\\_DEFAULT.ALS  
262 up

C:\WINMR98\COMMON\\_DEFAULT.ALS  
262 up  
DATIM Mon Dec 16 18:51:17 2002  
OBNUC 1H  
EXMOD NON  
OBFRQ 300.40 MHz  
OBSET 130.00 KHz  
OBFIN 1150.0 Hz  
POINT 32768  
FREQU 6013.2 Hz  
SCANS 16  
ACQTM 5.449 sec  
PD 1.551 sec  
PW1 5.7 us  
IRNUC 1H  
CTEMP 22.7 c  
SIVNT CD2CL2  
EXREF 5.32 ppm  
BF 0.12 Hz  
RGAIN 15

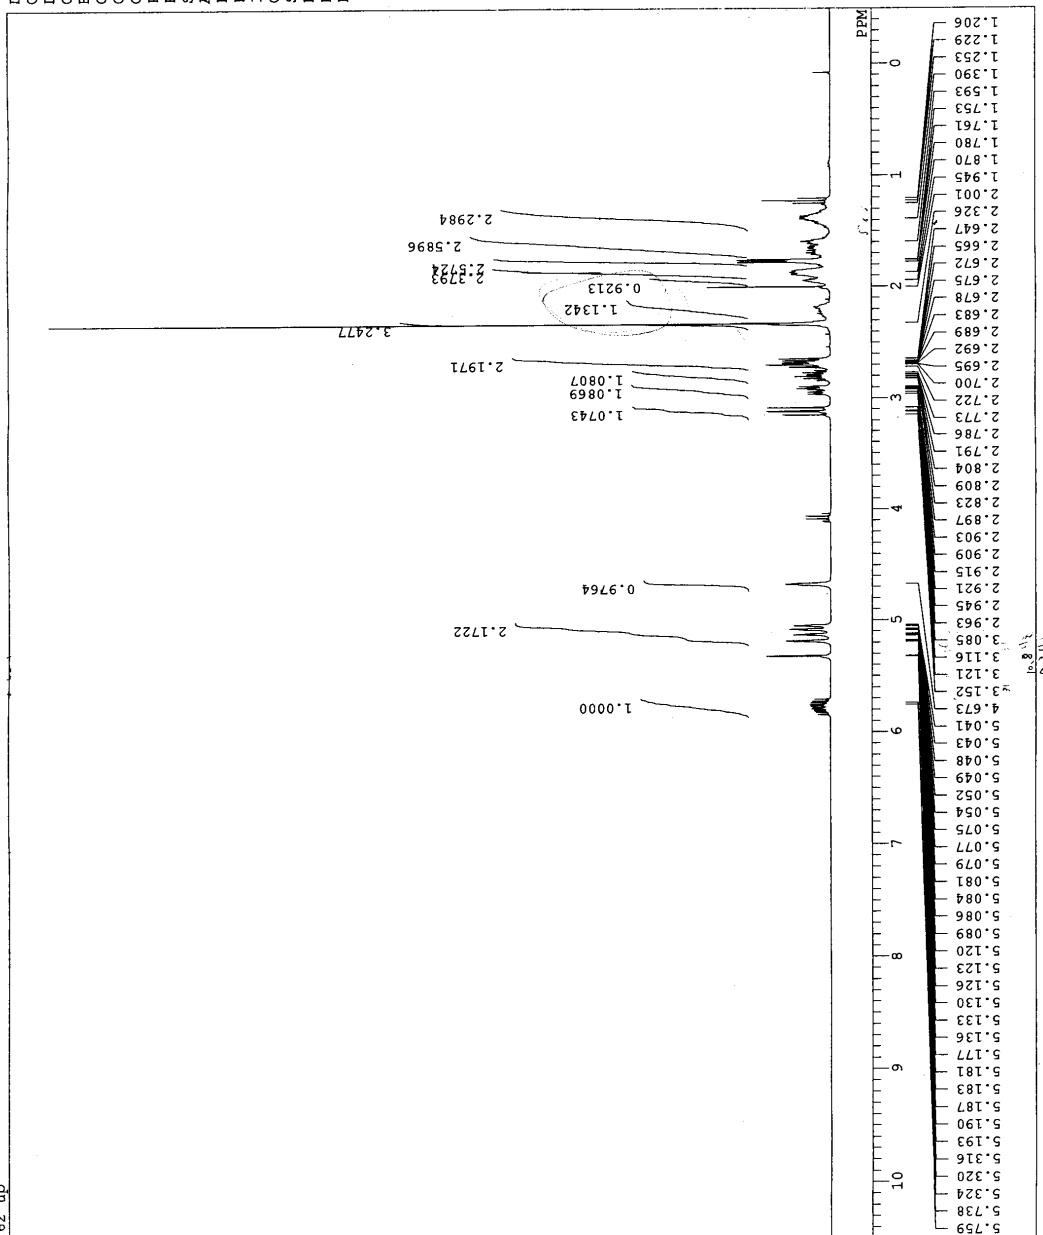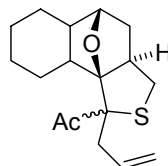

10c-major

C:\WINNMR98\COMMON\\_DEFAULT.ALS  
262 up

DFILE C:\WINNMR98\COMMON\\_DEFAULT.ALS  
 COMMT 262 up  
 DATIM Mon Dec 16 19:10:02 2002  
 QBNUC 13C  
 EXMOD BCM  
 OBFRQ 75.45 MHz  
 OBSET 124.00 KHz  
 OBFIN 1840.0 Hz  
 POINT 32768  
 FREQU 20408.1 Hz  
 SCANS 200  
 ACQTM 1.606 sec  
 PD 1.394 sec  
 PUL 4.4 us  
 1H  
 IRRUC 23.4 c  
 CD2CL2  
 SLVNT  
 EXREF 53.80 ppm  
 BF 0.12 Hz  
 RGAIN 24

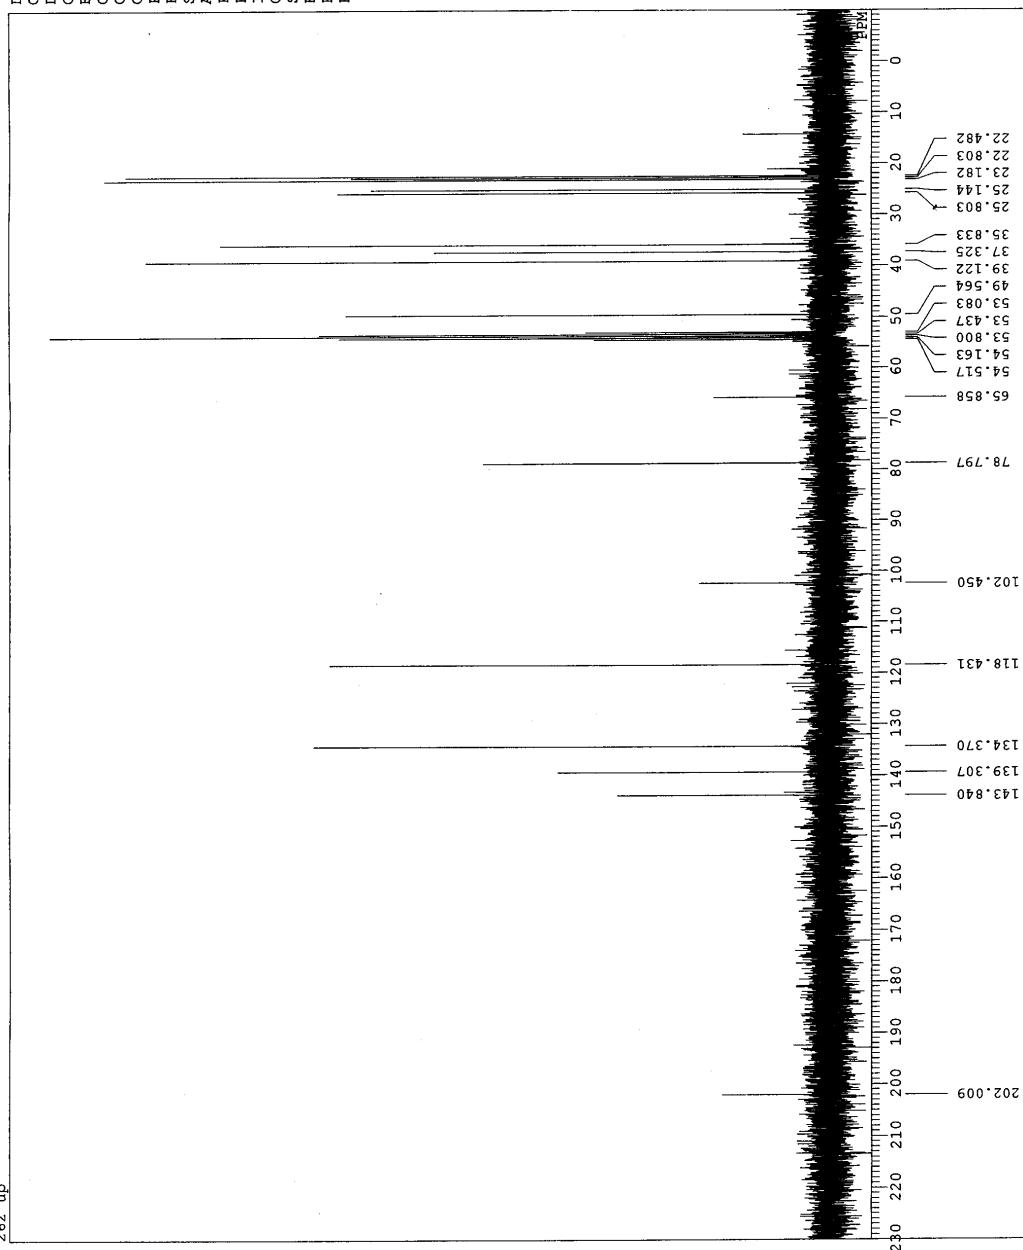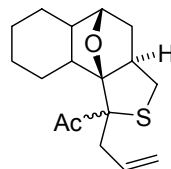

10c-major

C:\WINNR98\COMMON\DEFAULT.ALS  
262 under

DFILE C:\WINNR98\COMMON\DEFAULT.ALS  
COMNT 262 under  
DATIM Mon Dec 16 18:25:27 2002  
EXMOD 1H  
EXMOD NON

OSFRQ 300.40 MHz  
OSSET 130.00 KHz  
OBFIN 1150.0 Hz  
POINT 32768  
FREQU 6013.2 Hz  
SCANS 16  
ACQTM 5.449 sec  
PD 1.551 sec  
PWL 5.7 us  
IRNUC 1H  
CTEMP 22.2 C  
SLVNT CD2CL2  
EXREF 5.32 ppm  
BF 0.12 Hz  
RGAIN 15

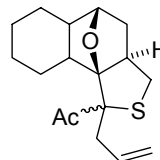

10c-minor

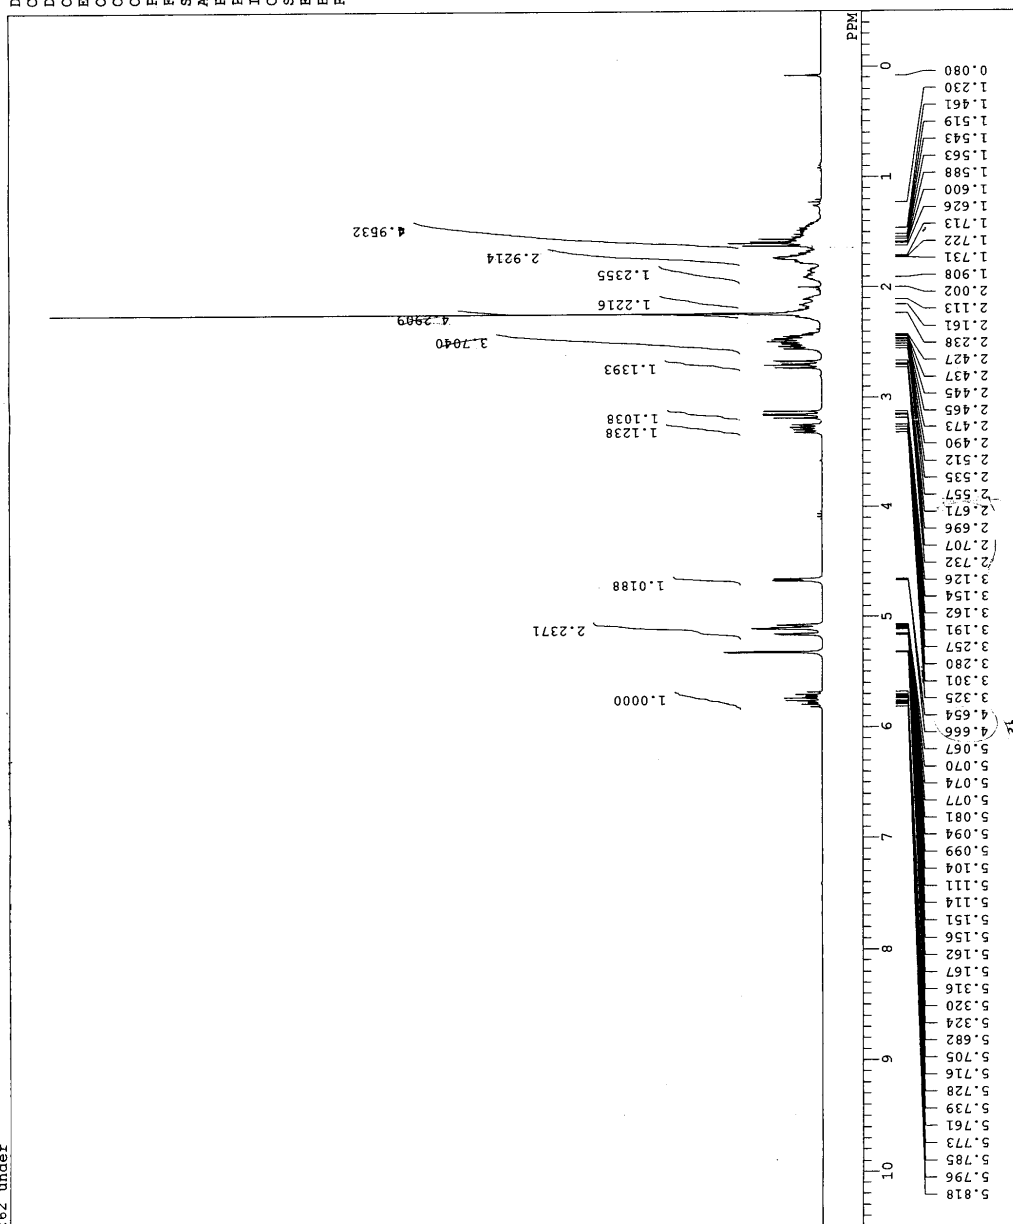



C:\WINNR98\COMMON\\_DEFAULT.ALS  
262 under

C:\WINNR98\COMMON\\_DEFAULT.ALS  
COMNT 262 under  
DATIM Mon Dec 16 18:43:39 2002  
OBNUC 13C  
EXMOD BCM  
OBFREQ 75.45 MHz  
OBSFQ 124.00 KHz  
OBSFQ 1840.0 Hz  
POINT 32768  
FREQ 20408.1 Hz  
SCANS 250  
ACQTM 1.606 sec  
PD 1.394 sec  
FWD 4.4 us  
IRNUC 1H  
CTEMP 22.9 c  
SLVNT CD2CL2  
EXREF 53.80 ppm  
BF 0.12 Hz  
RGAIN 24

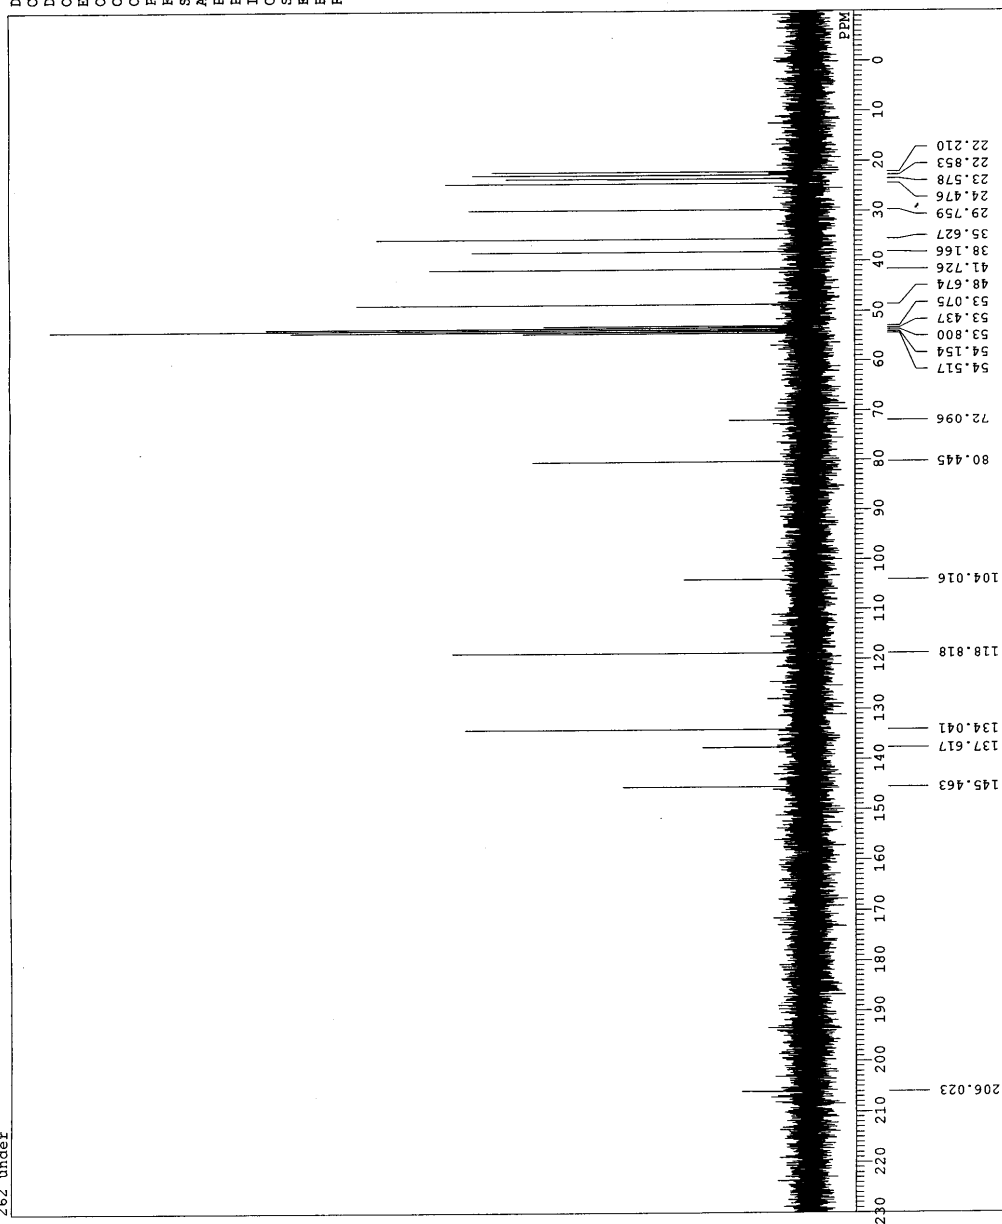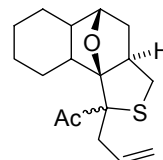

10c-minor

C:\WINNR98\COMMON\\_DEFAULT.ALS  
283-mid(D.A up)

DFILE C:\WINNR98\COMMON\\_DEFAULT.ALS  
COMNT 283-mid(D.A up)  
DATIM Mon Feb 17 11:45:52 2003  
OBNUC 1H  
EXMOD NON  
OBFRQ 399.65 MHz  
OBSET 124.00 KHz  
OBFIN 10500.0 Hz  
POINT 16384  
FREQU 8000.0 Hz  
SCANS 16  
ACQTM 2.048 sec  
PD 2.952 sec  
PWL 5.4 us  
IRNUC 1H  
CTEMP 24.3 C  
CD2CL  
SIVNT 0.07 ppm  
EXREF BF  
RGAIN 14

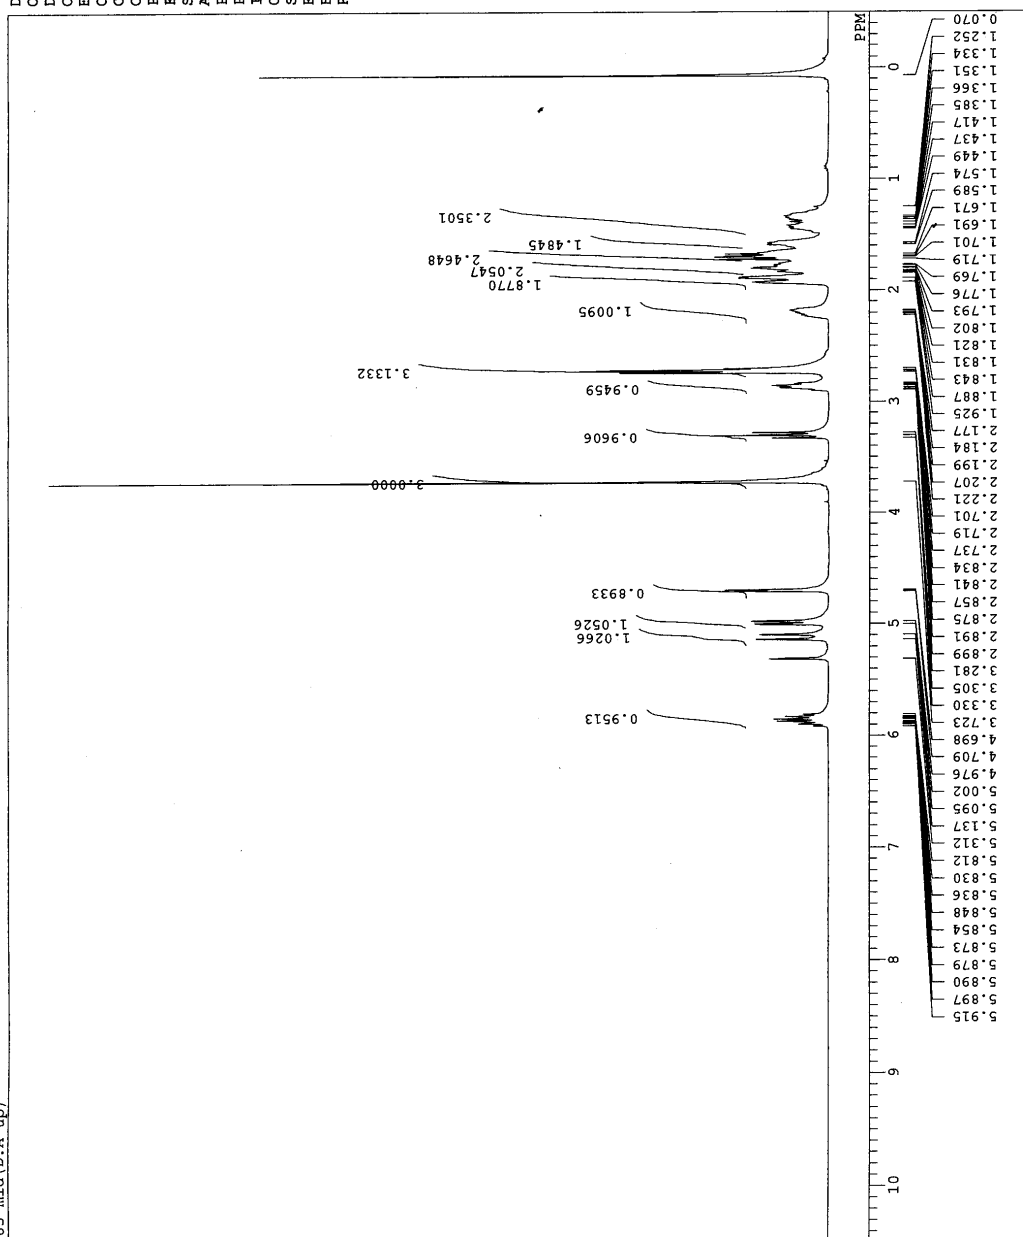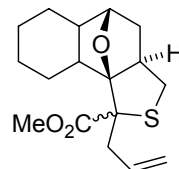

10d-major

C:\WINNR98\COMMON\\_DEFAULT.ALS  
283-mid (D.A up)

DFILE C:\WINNR98\COMMON\\_DEFAULT.ALS  
COMNT 283-mid (D.A up)  
DATIM Mon Feb 17 11:57:38 2003

OSNUC 13C  
EXMOD BCM  
OBFRQ 100.40 MHz  
OBSET 125.00 KHz  
OBFIN 10500.0 Hz  
POINT 32768  
FREQ 27173.9 Hz  
SCANS 130  
ACQTM 1.206 sec  
PD 1.794 sec  
F1 5.0 us  
IRNUC 1H  
CTEMP 25.1 c  
SIVNT CD2CL  
EXREF 53.80 dpm  
BF 1.00 Hz  
RGAIN 33

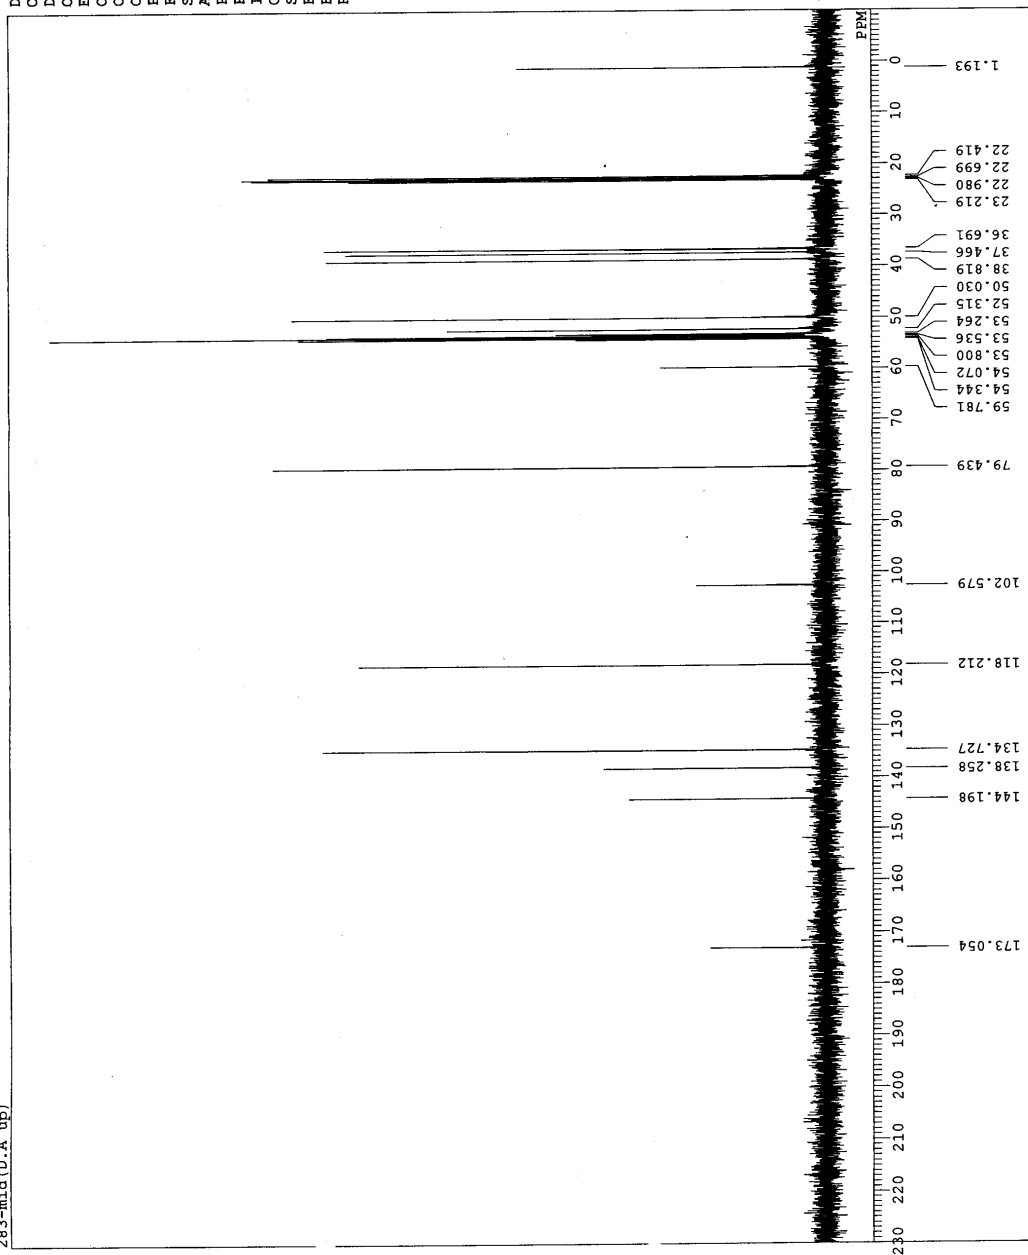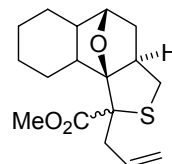

10d-major

C:\WINNR98\COMMON\\_DEFAULT.ALS  
284-D.A under

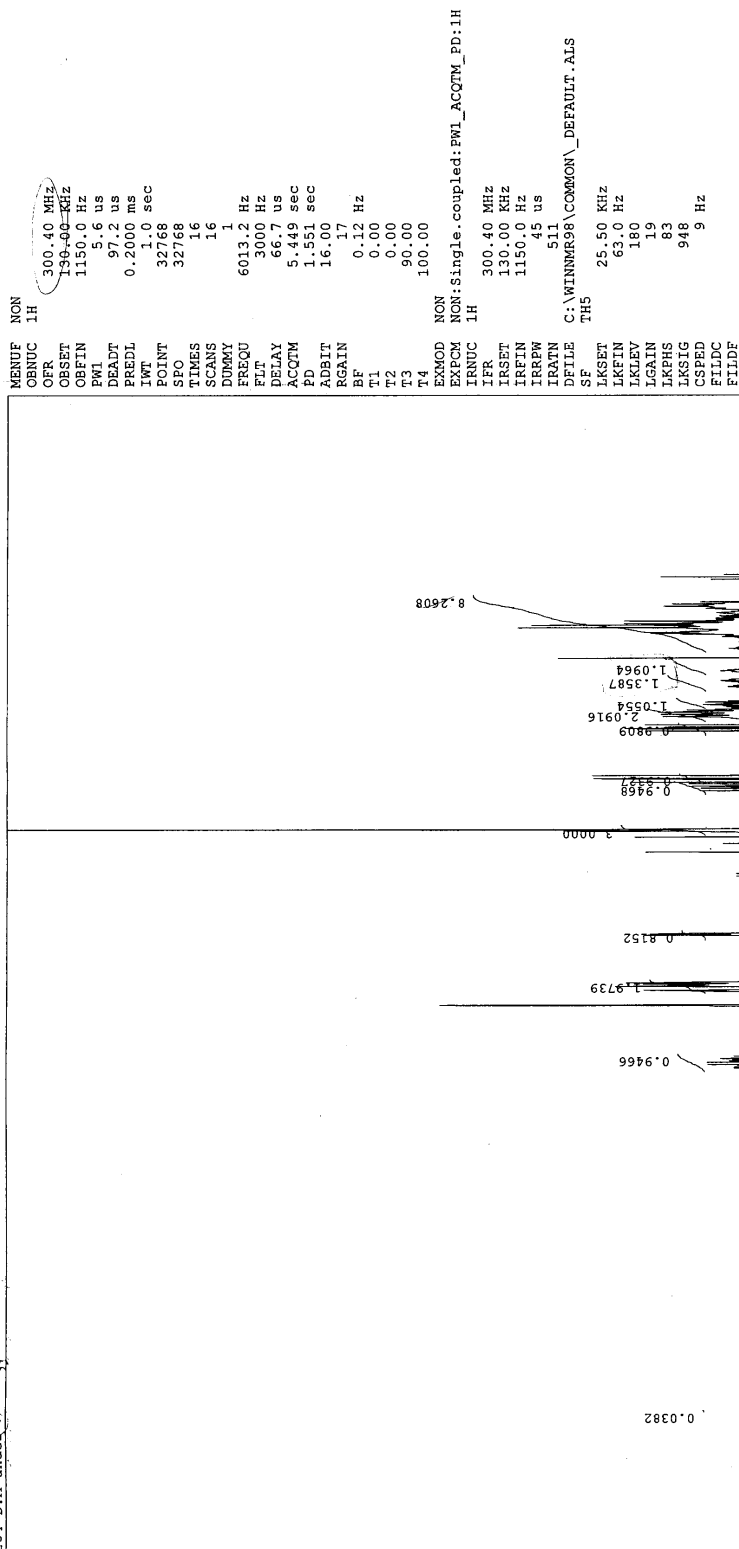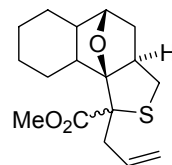

10d-minor

C:\WINNR98\COMMON\\_DEFAULT.ALS  
284-D.A under

```

MENUF BCM
OBNUC 13C
OPR 75.45 MHz
OBSET 124.00 KHz
OBFIN 1840.0 Hz
PWL 4.5 us
DEADT 27.2 us
FREDL 0.2000 ms
IWT 1.0 sec
POINT 32768
SPO 32768
TIMES 5000
SCANS 350
DUMMY 1
FREQ 20408.1 Hz
FLT 10200 Hz
DELAY 19.6 us
ACQTM 1.606 sec
PD 1.394 sec
ADBIT 16.00
RGAIN 24
BF 0.12 Hz
T1 0.00
T2 0.00
T3 90.00
T4 100.00
EXMOD BCM
EXFCM Bilevel.complete.decoupling.set_ir
IRNUC 1H
IFR 300.40 MHz
IRSET 130.00 KHz
IRFIN 1150.0 Hz
IRREW 45 us
IRATN 511
DFILE C:\WINNR98\COMMON\_DEFAULT.ALS
SF TH5
LKSET 25.50 KHz
LKFIN 63.0 Hz
LKLEV 180
LGAIN 19
LKPHS 83
LKSIG 929
CSPED 8 Hz
FILDC
FILDF

```

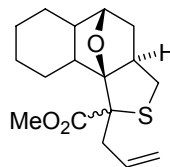

10d-minor

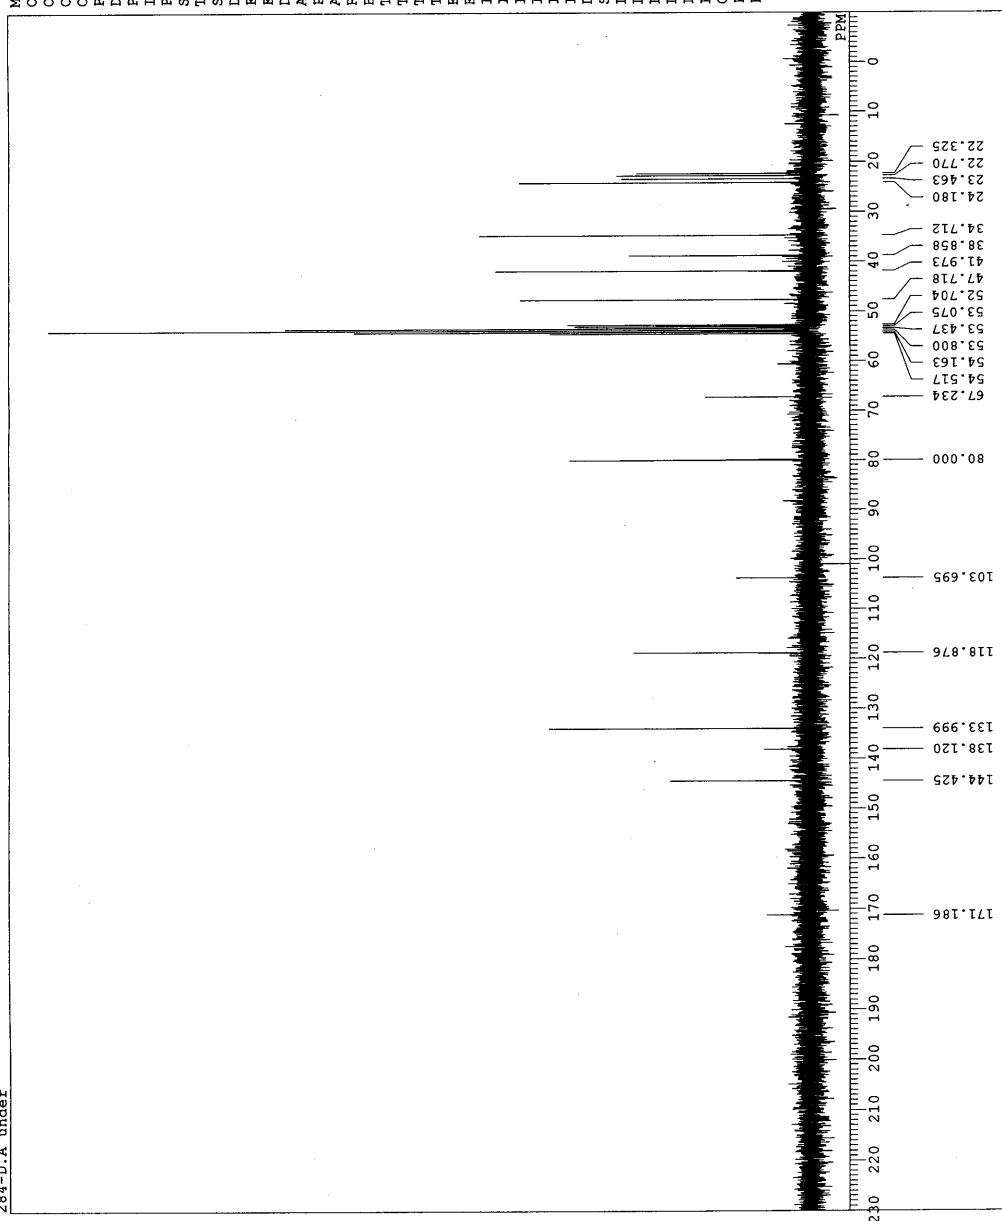

C:\WINNMR98\COMMON\DEFAULT.ALS  
cinnamyl-S-Rh

DFILE  
COMNT  
DATIM  
OBNUC  
EXMOD  
OBPRO  
OBSET  
OBFIN  
POINT  
FREQU  
SCANS  
ACQTM  
PD  
PWL  
IRNUC  
CTEMP  
SLVNT  
EXREF  
BF  
RGAIN

C:\WINNMR98\COMMON\DEFAULT.ALS  
cinnamyl-S-Rh  
Fri Mar 22 23:12:27 2002  
1H  
NON  
300.40 MHz  
130.00 KHz  
1150.0 Hz  
32768  
6013.2 Hz  
8  
5.449 sec  
1.551 sec  
5.7 us  
1H  
23.3 c  
C4D8O2  
3.58 ppm  
0.12 Hz  
11

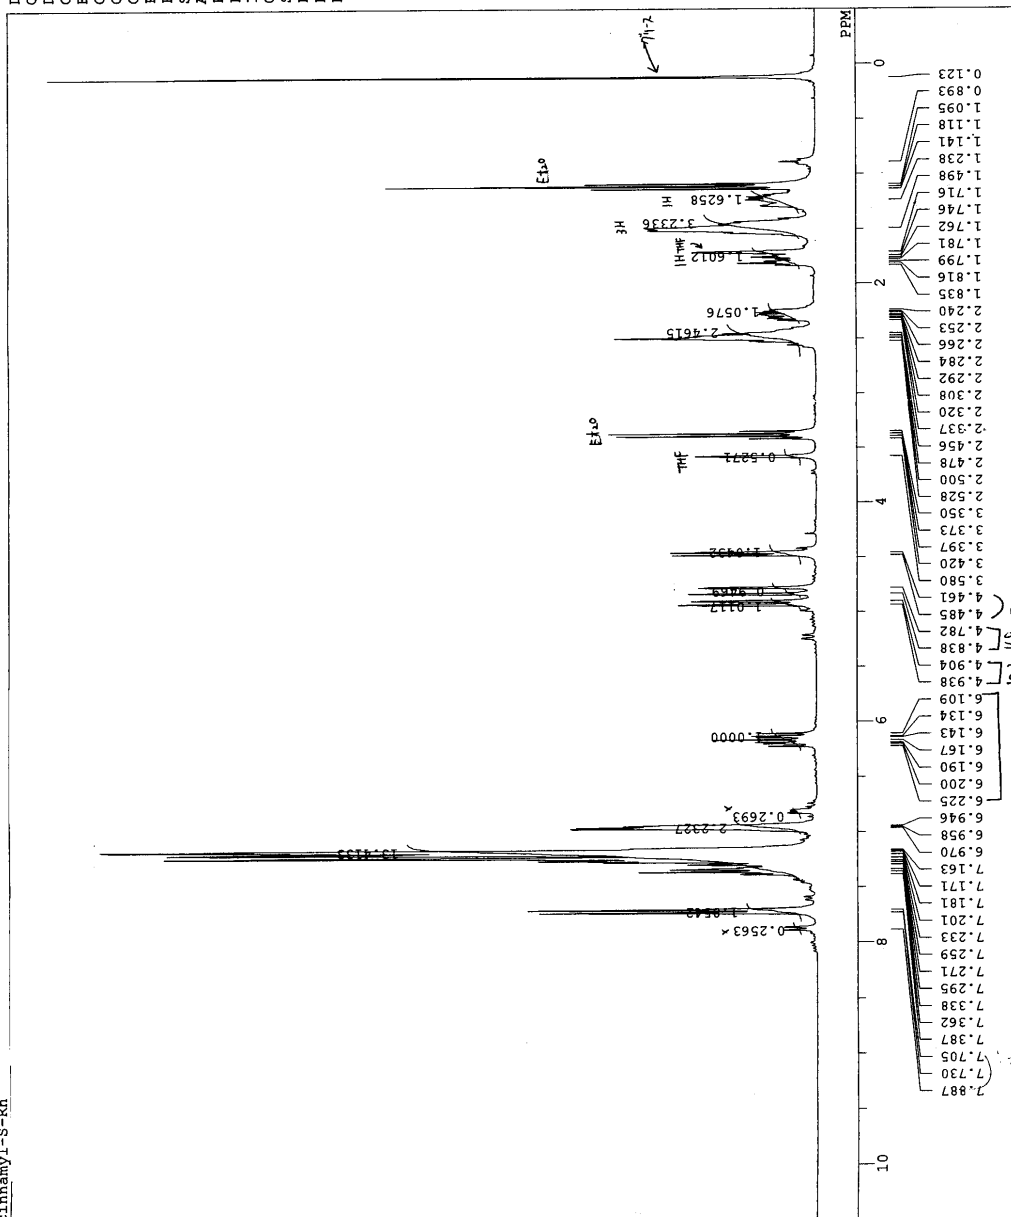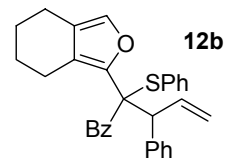

C:\WINNR98\COMMON\\_DEFAULT.ALS  
cinnamyl-S-Rh

D:\FILE C:\WINNR98\COMMON\\_DEFAULT.ALS  
COMNT cinnamyl-S-Rh  
DATIM Fri Mar 22 23:07:18 2002  
OBNUC 13C  
EXMOD BCM

OBFRQ 75.45 MHz  
OBSET 124.00 KHz  
OBFIN 1840.0 Hz  
POINT 32768  
FREQU 20408.1 Hz  
SCANS 56  
ACQTM 1.606 sec  
PD 1.394 sec  
PW1 4.3 us  
IRNUC 1H  
CTEMP 23.3 C  
SIUNT C4D802  
EXREF 65.80 ppm  
BF 0.12 Hz  
RGAIN 23

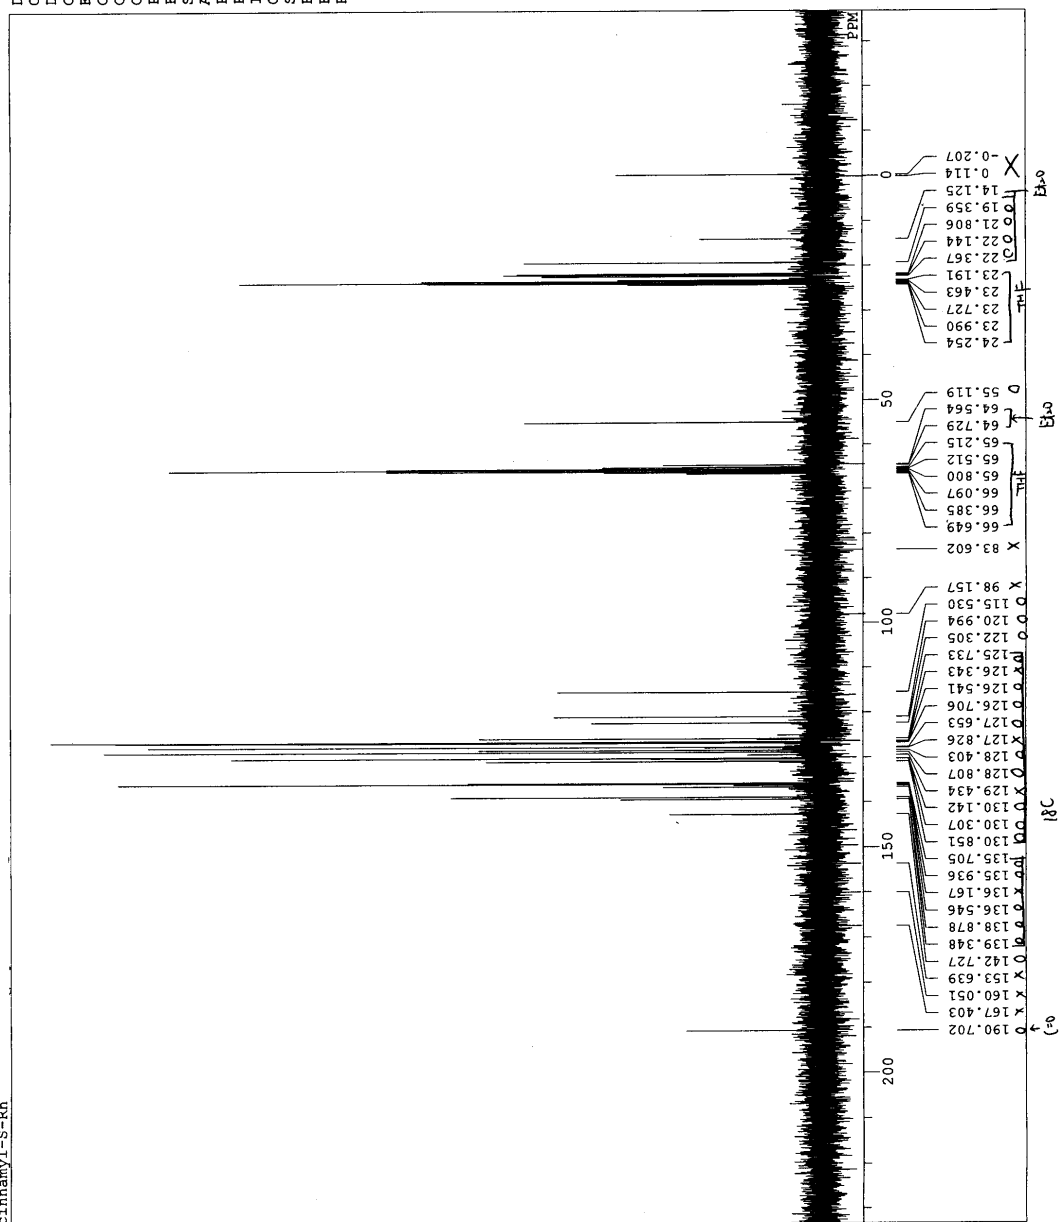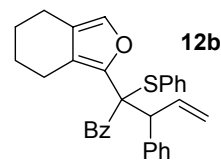

C:\WINMR98\COMMON\\_DEFAULT.ALS  
293 -L

DFILE C:\WINMR98\COMMON\\_DEFAULT.AL  
CONNT 293  
DATIM Tue Mar 11 19:23:49 2003  
OENUC 1H  
EXMOD NON  
OBFRQ 270.05 MHz  
OBSET 112.00 KHz  
OBFIN 5800.0 Hz  
POINT 16384  
FREQU 5402.4 Hz  
SCANS 16  
ACQTM 3.033 sec  
PD 2.000 sec  
PW1 5.6 us  
IRNUC 1H  
CTEMP 28.3 c  
SLVNT CD2CL  
EXREF 0.00 ppm  
BF 1.00 Hz  
YG  
IG  
RGAIN 20

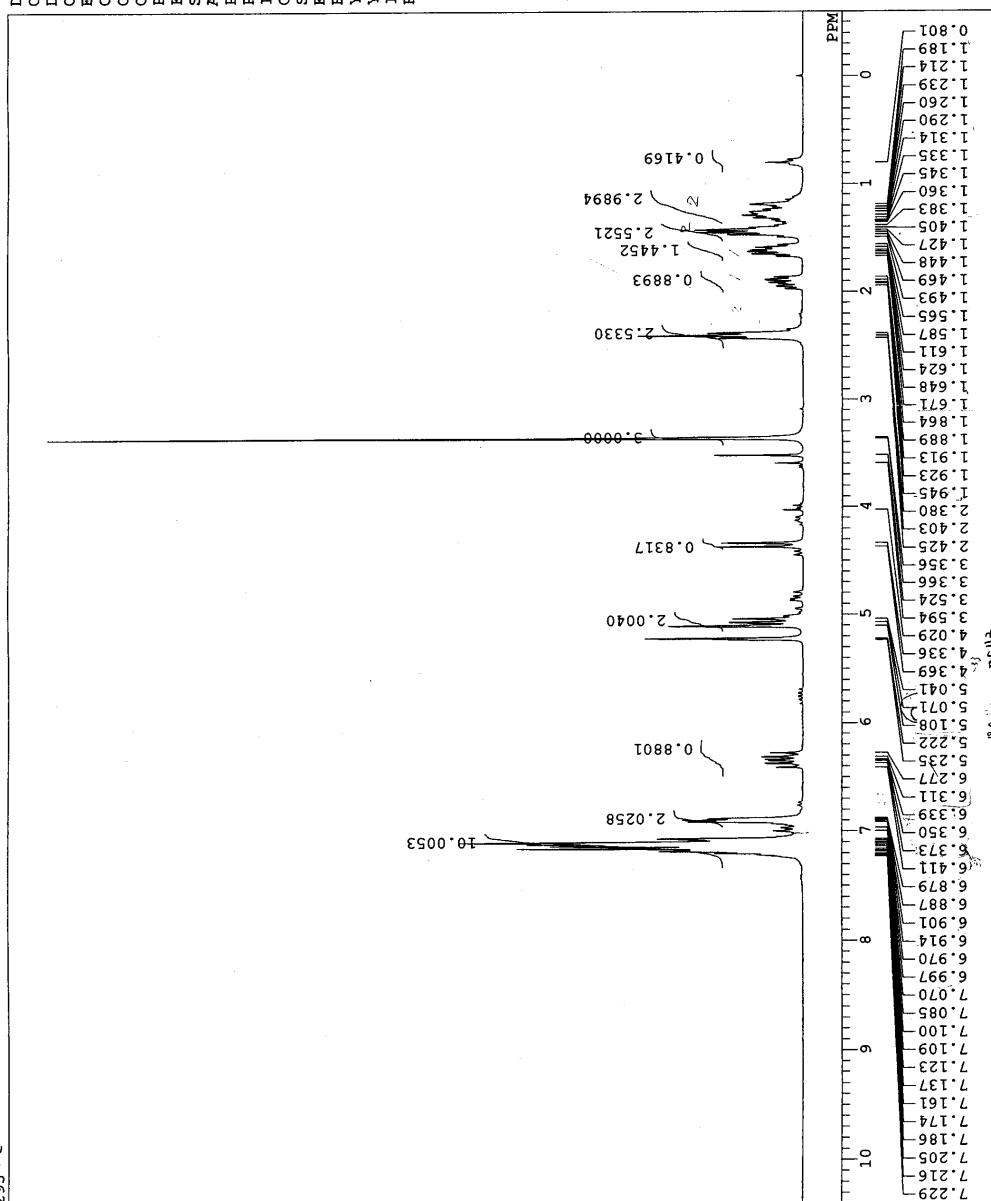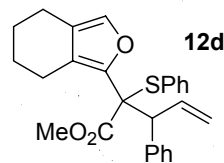



C:\WINNMR98\COMMON\\_DEFAULT.ALS  
293

DFILE C:\WINNMR98\COMMON\\_DEFAULT.ALS

COMNT 293  
DATIM Tue Mar 11 19:51:30 2003

OBNUC 13C  
EXMOD BCM

OBFRQ 67.80 MHz  
OBSET 135.00 KHz

OBFIN 5200.0 Hz  
POINT 32768

FREQU 18315.0 Hz  
SCANS 499

ACQTM 1.789 sec  
PD 1.211 sec

PW1 4.2 us  
IRNUC 1H

CTEMP 29.4 c  
SLVNT CD2CL

EXREF 53.80 ppm  
BF 1.00 Hz

YG  
IG

RGAIN 29

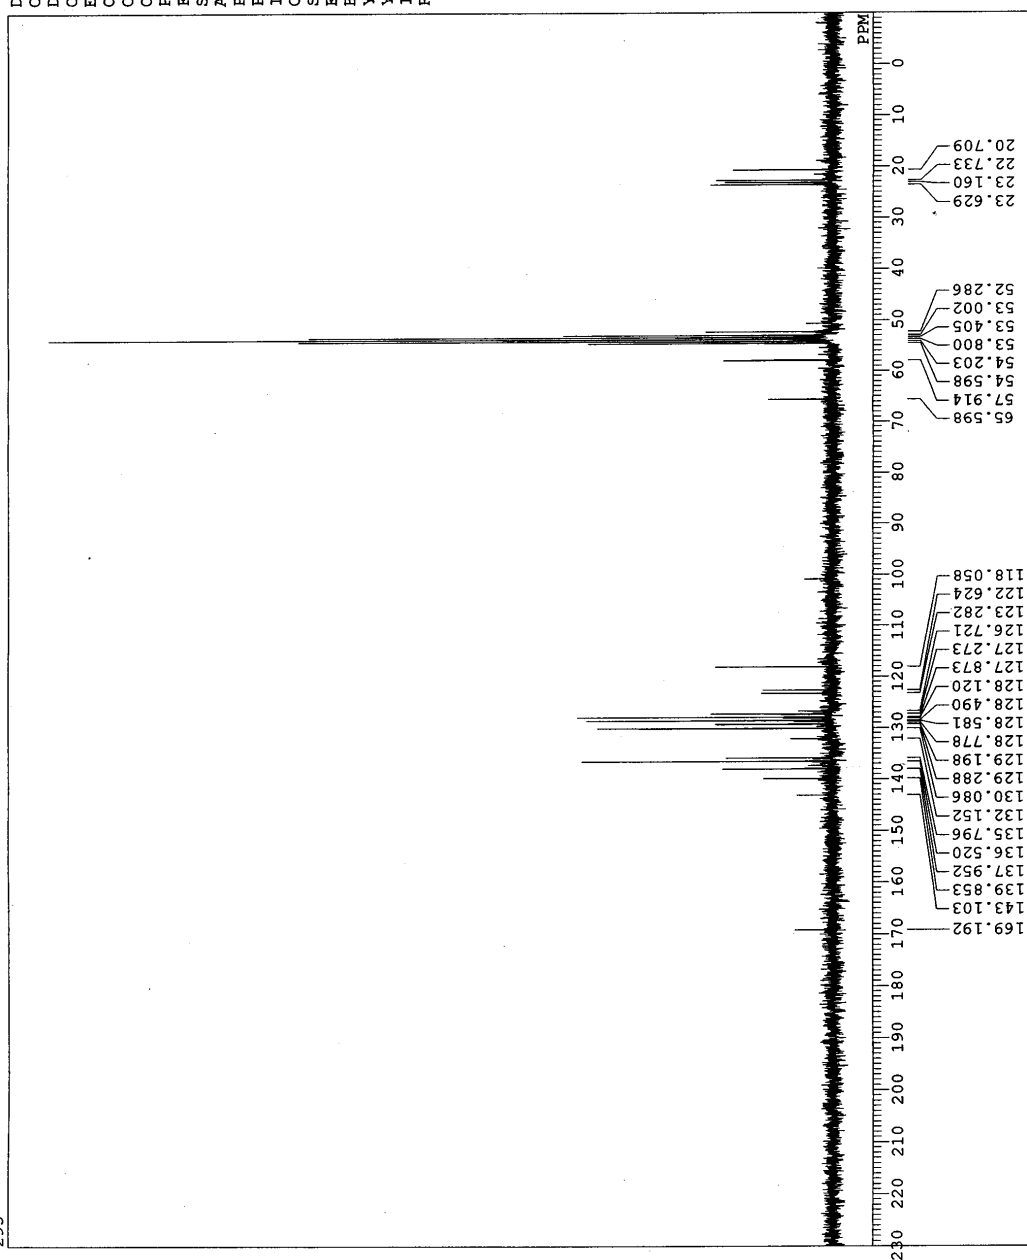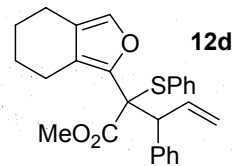

Supplement: Supplementary file 1 [file 5840544]
